# Supplementary material for: Transcranial magnetic stimulation enhances the specificity of multiple sclerosis diagnostic criteria: a critical narrative review
Source: PeerJ. 2024 Mar 29;12:e17155. doi: 10.7717/peerj.17155 (PMC10984191; doi:10.7717/peerj.17155)
Supplement: Supplemental Information 2 [file peerj-12-17155-s002.xlsx]

## Sheet: Title Review
Authors	Title	Journal	Year	Verdict	Rationale
[No Author]	A transcranialis mágneses ingerlés szerepe a klinikai diagnosztikában: motoros kiváltott válasz (MEP).	Ideggyógyászati szemle (2002) 55:9-10 (292-302). Date of Publication: 20 Sep 2002	2002	N	Not English
Abdelfatteh M., Mohamed B., Moncef B.R., Samir D.M., Mondher M., Chen L., Huang H., Masri W.S.E., Xi H., Bryukhovetskiy A.S., Chernykh E.R., Stupak V.V., Muradov G.M., Siziko M.Y., Shevela E.Y., Leplina O.Y., Tikhonova M.A., Kulagin A.D., Ostanin A.A.	Spinal cord injury	Neurorestoratology: Volume 2: Clinical Progress of Neurorestoratology	2015	N	Not MS
Abdelkader A.A.	Repetitive tms in treatment of resistant diabetic neuropathic pain	Egyptian Journal of Neurology, Psychiatry and Neurosurgery	2019	N	Not MS
Abe O., Yamada H., Masutani Y., Aoki S., Kunimatsu A., Yamasue H., Fukuda R., Kasai K., Hayashi N., Masumoto T., Mori H., Soma T., Ohtomo K.	Amyotrophic lateral sclerosis: Diffusion tensor tractography and voxel-based analysis	NMR in Biomedicine	2004	N	Not MS
Abe Y., Nakamura H., Yoshino O., Oya T., Kimura T.	Decreased neural damage after spinal cord injury in tPA-deficient mice	Journal of Neurotrauma	2003	N	Not MS
Abrams B.M., Waldman H.J.	Electromyography and evoked potentials	Practical Management of Pain: Fifth Edition	2013	Y
Absalom A.R., Grundy B.L., Lee M.	Monitoring the central nervous system	Wylie and Churchill-Davidsons: A Practice of Anesthesia, Seventh Edition	2003	Y
Adair D., Truong D., Esmaeilpour Z., Gebodh N., Borges H., Ho L., Douglas Bremner J., Badran B.W., Napadow V., Clark V.P., Bikson M.	Electrical stimulation of cranial nerves in cognition and disease	Brain Stimulation	2020	N	Not TMS
Adamovich S.V., Fluet G.G., Tunik E., Merians A.S.	Sensorimotor training in virtual reality: A review	NeuroRehabilitation	2009	N	Not original research
Ahn H., Suchting R., Woods A.J., Miao H., Green C., Cho R.Y., Choi E., Fillingim R.B.	Bayesian analysis of the effect of transcranial direct current stimulation on experimental pain sensitivity in older adults with knee osteoarthritis: Randomized sham-controlled pilot clinical study	Journal of Pain Research	2018	N	Not MS
Ahonen J.-P., Jehkonen M., Dastidar P., Molnár G., Häkkinen V.	Cortical silent period evoked by transcranial magnetic stimulation in ischemic stroke	Electroencephalography and Clinical Neurophysiology - Electromyography and Motor Control	1998	N	Not MS
Akerman S., Romero-Reyes M., Holland P.R.	Current and novel insights into the neurophysiology of migraine and its implications for therapeutics	Pharmacology and Therapeutics	2017	N	Not MS
Albert S.J., Kesselring J.	Neurorehabilitation of stroke	Journal of Neurology	2012	N	Not MS
Alhassani G., Treleaven J., Schabrun S.S.M.	Combined transcranial and trans-spinal direct current stimulation in chronic headache: A feasibility and safety trial for a novel intervention	Hong Kong Physiotherapy Journal	2017	N	Not MS
Allah Elshehaby F.G.	Brain Excitability Changes in the Relapsing and Remitting Phases of Multiple Sclerosis: A Study with Transcranial Magnetic Stimulation	Egyptian Journal of Neurology, Psychiatry and Neurosurgery	2010	Y
Allali G.	Brain imaging of locomotion in neurological conditions	Neurophysiologie Clinique	2018	N	Not original research
Almonte M.T., Capellàn P., Yap T.E., Cordeiro M.F.	Retinal correlates of psychiatric disorders	Therapeutic Advances in Chronic Disease	2020	N	Not TMS
Al-Sultan F., Al-Zahrani A., Al-Kahtani F., Al-Thaqib A., Al-Mousa A., Bashir S.	The future of transcranial magnetic stimulation in neuroscience and neurology in the Middle East	European Review for Medical and Pharmacological Sciences	2019	N
Amador M.J., Guest J.D.	An appraisal of ongoing experimental procedures in human spinal cord injury	Journal of Neurologic Physical Therapy	2005	N	Not MS
Amann M., Venturelli M., Ives S.J., McDaniel J., Layec G., Rossman M.J., Richardson R.S.	Peripheral fatigue limits endurance exercise via a sensory feedback-mediated reduction in spinal motoneuronal output	Journal of Applied Physiology	2013	N	Not MS
Amato M.P., Prestipino E., Bellinvia A.	Identifying risk factors for cognitive issues in multiple sclerosis	Expert Review of Neurotherapeutics	2019	Y
Amboni M., Santangelo G., Barone P.	Depression, apathy, anhedonia, and fatigue in Parkinson's disease	Neuropsychiatric Symptoms of Movement Disorders	2015	N	Not MS
Ammer K.	Medical Thermology 2017 - A computer-assisted literature survey	Thermology International	2018	N	Not original research
Anastakis D.J., Malessy M.J.A., Chen R., Davis K.D., Mikulis D.	Cortical Plasticity Following Nerve Transfer in the Upper Extremity	Hand Clinics	2008	N	Not MS
Anderson V., Northam E., Wrennall J.	Developmental neuropsychology: A clinical approach	Developmental Neuropsychology: A Clinical Approach	2018	N	Not MS
Andrewes D.	Neuropsychology: From theory to practice, Second Edition	Neuropsychology: From Theory to Practice, Second Edition	2015	N	Not TMS
Andrzejewska A., Dabrowska S., Lukomska B., Janowski M.	Mesenchymal Stem Cells for Neurological Disorders	Advanced Science	2021	N	Not TMS
Anisman H., Hayley S., Kusnecov A.	The immune system and mental health	The Immune System and Mental Health	2018	N	Not TMS
Antal A., Alekseichuk I., Bikson M., Brockmöller J., Brunoni A.R., Chen R., Cohen L.G., Dowthwaite G., Ellrich J., Flöel A., Fregni F., George M.S., Hamilton R., Haueisen J., Herrmann C.S., Hummel F.C., Lefaucheur J.P., Liebetanz D., Loo C.K., McCaig C.D., Miniussi C., Miranda P.C., Moliadze V., Nitsche M.A., Nowak R., Padberg F., Pascual-Leone A., Poppendieck W., Priori A., Rossi S., Rossini P.M…	Low intensity transcranial electric stimulation: Safety, ethical, legal regulatory and application guidelines	Clinical Neurophysiology	2017	N	Not original research
Antony A.B., Mazzola A.J., Dhaliwal G.S., Hunter C.W.	Neurostimulation for the treatment of chronic head and facial pain: A literature review	Pain Physician	2019	N	Not MS
Aoyagi K., Sharma N.K.	Correlation Between Central Sensitization and Remote Muscle Performance in Individuals With Chronic Low Back Pain	Journal of Manipulative and Physiological Therapeutics	2021	N	Not MS
Arányi Z, Simó M.	[Role of transcranial magnetic stimulation in clinical diagnosis: motor-evoked potential (MEP)]	Ideggyogy Sz	2002	N	Not English
Argyropoulos G.P.D., van Dun K., Adamaszek M., Leggio M., Manto M., Masciullo M., Molinari M., Stoodley C.J., Van Overwalle F., Ivry R.B., Schmahmann J.D.	The Cerebellar Cognitive Affective/Schmahmann Syndrome: a Task Force Paper	Cerebellum	2020	N	Not MS
Arioli M., Crespi C., Canessa N.	Social Cognition through the Lens of Cognitive and Clinical Neuroscience	BioMed Research International	2018	N	Not TMS
Arnold E., Farmer B., Keightley M., Lee D., Rigel T., Hoque M., Sabatier M.J.	Walking duration and slope steepness determine the effect of downslope walking on the soleus H-reflex pathway	Neuroscience Letters	2017	N	Not TMS
Arsiwalla X.D.	Network dynamics with BrainX(3): A large-scale simulation of the human brain network with real-time interaction	Frontiers in Neuroinformatics	2015	N	Not TMS
Aruta F.	Lichenoid rash: A new side effect of oral Cladribine	Multiple Sclerosis and Related Disorders	2020	N	Not TMS
Ashizawa T., Öz G., Paulson H.L.	Spinocerebellar ataxias: prospects and challenges for therapy development	Nature Reviews Neurology	2018	N	Not MS
Attarian S.	Triple-stimulation technique improves the diagnosis of chronic inflammatory demyelinating polyradiculoneuropathy	Muscle and Nerve	2015	N	Not MS
Aurora S.K., Barrodale P.M., Tipton R.L., Khodavirdi A.	Brainstem dysfunction in chronic migraine as evidenced by neurophysiological and positron emission tomography studies	Headache	2007	N	Not MS
Awai L., Dietz V., Curt A.	Rehabilitation-dependent neural plasticity after spinal cord injury	Translational Neuroscience: Fundamental Approaches for Neurological Disorders	2016	N	Not MS
Awiszus F., Feistner H.	Rapid on-line estimation of responses to transcranial magnetic and peripheral nerve electrical stimulation in single human motoneurons	Journal of Neuroscience Methods	1995	N	Not MS
Baars B.J., Gage N.M.	Cognition, Brain and Consciousness	Cognition, Brain and Consciousness	2010	N	Not original research
Baert I.A.C., Nijs J., Meeus M., Lluch E., Struyf F.	The effect of lateral wedge insoles in patients with medial compartment knee osteoarthritis: balancing biomechanics with pain neuroscience	Clinical Rheumatology	2014	N	Not MS
Baguley D., Andersson G., McFerran D., McKenna L.	Tinnitus: A Multidisciplinary Approach: Second Edition	Tinnitus: A Multidisciplinary Approach: Second Edition	2013	N	Not MS
Balasubramanian S., Melendez-Calderon A., Roby-Brami A., Burdet E.	On the analysis of movement smoothness	Journal of NeuroEngineering and Rehabilitation	2015	N	Not MS
Balloff C, Penner IK, Ma M, Georgiades I, Scala L, Troullinakis N, Graf J, Kremer D, Aktas O, Hartung HP, Meuth SG, Schnitzler A, Groiss SJ, Albrecht P.	The degree of cortical plasticity correlates with cognitive performance in patients with Multiple Sclerosis	Brain Stimul	2022	Y
Balloff C.	Synaptic plasticity is reduced in patients with rrms compared to healthy controls and associated with neuropsychological outcomes	Multiple Sclerosis Journal	2020	Y
Barofsky I.	Quality: Its definition and measurement as applied to the Medically ill	Quality: Its Definition and Measurement as Applied to the Medically Ill	2012	N	Not MS
Bar-Or A., Pachner A., Menguy-Vacheron F., Kaplan J., Wiendl H.	Teriflunomide and its mechanism of action in multiple sclerosis	Drugs	2014	Y
Barthélemy D., Grey M.J., Nielsen J.B., Bouyer L.	Involvement of the corticospinal tract in the control of human gait	Progress in Brain Research	2011	N	Not MS
Bartley J.E., Boeving E.R., Riedel M.C., Bottenhorn K.L., Salo T., Eickhoff S.B., Brewe E., Sutherland M.T., Laird A.R.	Meta-analytic evidence for a core problem solving network across multiple representational domains	Neuroscience and Biobehavioral Reviews	2018	N	Not original research
Bartolomeo P., Thiebaut De Schotten M., Doricchi F.	Left unilateral neglect as a disconnection syndrome	Cerebral Cortex	2007	N	Not MS
Barton J.J.S.	Disorders of higher visual processing	Handbook of Clinical Neurology	2011	N	Not MS
Barton J.J.S.	Motion perception and its disorders	Handbook of Clinical Neurology	2021	N	Not MS
Basu S.K., Pradhan S., du Plessis A.J., Ben-Ari Y., Limperopoulos C.	GABA and glutamate in the preterm neonatal brain: In-vivo measurement by magnetic resonance spectroscopy	NeuroImage	2021	N	Not adults
Bauer I.E., Suchting R., Cazala F., Alpak G., Sanches M., Nery F.G., Zunta-Soares G.B., Soares J.C.	Changes in amygdala, cerebellum, and nucleus accumbens volumes in bipolar patients treated with lamotrigine	Psychiatry Research - Neuroimaging	2018	N	Not MS
Bäumer T., Bock F., Koch G., Lange R., Rothwell J.C., Siebner H.R., Münchau A.	Magnetic stimulation of human premotor or motor cortex produces interhemispheric facilitation through distinct pathways	Journal of Physiology	2006	N	Not MS
Bede, P; Bokde, ALW; Byrne, S; Elamin, M; Fagan, AJ; Hardiman, O	Spinal cord markers in ALS: Diagnostic and biomarker considerations	AMYOTROPHIC LATERAL SCLEROSIS	2012	N	Not MS
Bedeutung der evozierten potenziale in der diagnostik der multiplen sklerose	Diagnostic relevance of evoked potentials in multiple sclerosis	Nervenheilkunde (2002) 21:2 (69-73). Date of Publication: 2002	2002	Y
Bedlack R.S., Joyce N., Carter G.T., Paganoni S., Karam C.	Complementary and Alternative Therapies in Amyotrophic Lateral Sclerosis	Neurologic Clinics	2015	N	Not MS
Begemann, MJ; Brand, BA; Curcic-Blake, B; Aleman, A; Sommer, IE	Efficacy of non-invasive brain stimulation on cognitive functioning in brain disorders: a meta-analysis	PSYCHOLOGICAL MEDICINE	2020	N	Not original research
Benedetti F., Bernasconi A., Pontiggia A.	Depression and neurological disorders	Current Opinion in Psychiatry	2006	N	Not original research
Benoliel R., Gaul C.	Persistent idiopathic facial pain	Cephalalgia	2017	N	Not MS
Benussi A., Alberici A., Buratti E., Ghidoni R., Gardoni F., Luca M.D., Padovani A., Borroni B.	Toward a glutamate hypothesis of frontotemporal dementia	Frontiers in Neuroscience	2019	N	Not MS
Beppi C., Ribeiro Violante I., Scott G., Sandrone S.	EEG, MEG and neuromodulatory approaches to explore cognition: Current status and future directions	Brain and Cognition	2021	N	Not MS
Berent S., Albers J.W.	Neurobehavioral toxicology: Neurological and neuropsychological perspectives, volume I: Foundations and methods	Neurobehavioral Toxicology: Neurological and Neuropsychological Perspectives, Volume I: Foundations and Methods	2012	N	Not MS
Bergen D., Schroer J., Woodin M.	Brain research in education and the social sciences: Implications for practice, parenting, and future society	Brain Research in Education and the Social Sciences: Implications for Practice, Parenting, and Future Society	2017	N	Not MS
Berger M., Nadler J.W., Browndyke J., Terrando N., Ponnusamy V., Cohen H.J., Whitson H.E., Mathew J.P.	Postoperative Cognitive Dysfunction. Minding the Gaps in Our Knowledge of a Common Postoperative Complication in the Elderly.	Anesthesiology Clinics	2015	N	Not MS
Bernabeu A., Alfaro A., García M., Fernández E.	Proton magnetic resonance spectroscopy (1H-MRS) reveals the presence of elevated myo-inositol in the occipital cortex of blind subjects	NeuroImage	2009	N	Not MS
Bernardi E., Moreva E., Traina P., Petrini G., Ditalia Tchernij S., Forneris J., Pastuovi? Ž., Degiovanni I.P., Olivero P., Genovese M.	A biocompatible technique for magnetic field sensing at (sub)cellular scale using Nitrogen-Vacancy centers	EPJ Quantum Technology	2020	N	Not MS
Berryhill M.E., Martin D.	Cognitive Effects of Transcranial Direct Current Stimulation in Healthy and Clinical Populations: An Overview	Journal of ECT	2018	N	Not MS
Bertoli M.	Fatigue in multiple sclerosis: Does the functional or structural damage prevail?	Multiple Sclerosis Journal	2020	Y
Bhattacharya A., Mrudula K., Sreepada S.S., Narsappa S.T., Pal P.K., Chen R., Dr K.U.	An overview of non-invasive brain stimulation: Basic principles and clinical applications	Canadian Journal of Neurological Sciences	2021	N	Not original research
Bigler E.D.	Neuroimaging biomarkers in mild traumatic brain injury (mTBI)	Neuropsychology Review	2013	N	Not MS
Bikson M., Brunoni A.R., Charvet L.E., Clark V.P., Cohen L.G., Deng Z.-D., Dmochowski J., Edwards D.J., Frohlich F., Kappenman E.S., Lim K.O., Loo C., Mantovani A., McMullen D.P., Parra L.C., Pearson M., Richardson J.D., Rumsey J.M., Sehatpour P., Sommers D., Unal G., Wassermann E.M., Woods A.J., Lisanby S.H.	Rigor and reproducibility in research with transcranial electrical stimulation: An NIMH-sponsored workshop	Brain Stimulation	2018	N	Not MS
Bikson, M; Hanlon, CA; Woods, AJ; Gillick, BT; Charvet, L; Lamm, C; Madeo, G; Holczer, A; Almeida, J; Antal, A; Ay, MR; Baeken, C; Blumberger, DM; Campanella, S; Camprodon, JA; Christiansen, L; Loo, C; Crinion, JT; Fitzgerald, P; Gallimberti, L; Ghobadi-Azbari, P; Ghodratitoostani, I; Grabner, RH; Hartwigsen, G; Hirata, A; Kirton, A; Knotkova, H; Krupitsky, E; Marangolo, P; Nakamura-Palacios, EM;…	Guidelines for TMS/tES clinical services and research through the COVID-19 pandemic	BRAIN STIMULATION	2020	N	Not original research
Billeri L., Naro A.	A narrative review on non-invasive stimulation of the cerebellum in neurological diseases	Neurological Sciences	2021	N	Not original research
Binhi V.N.	Electromagnetic mind control: Fact or fiction? A scientific view	Electromagnetic Mind Control: Fact or Fiction? A Scientific View	2009	N	Not MS
Bocci T., Caleo M., Tognazzi S., Francini N., Briscese L., Maffei L., Rossi S., Priori A., Sartucci F.	Evidence for metaplasticity in the human visual cortex	Journal of Neural Transmission	2014	N	Not MS
Bodnar R.J.	Endogenous opiates and behavior: 2017	Peptides	2020	N	Not MS
Boggio P.S., Rêgo G.G., Marques L.M., Costa T.L.	Social psychology and noninvasive electrical stimulation: A promising marriage	European Psychologist	2016	N	Not TMS
Bojakowski J.	The history of motor evoked potentials by using transcranial magnetic stimulation. Pioneers and continuators	Family Medicine and Primary Care Review	2015	N	Not original research
Bókkon I., Till A., Grass F., Erdöfi Szabó A.	Phantom pain reduction by low-frequency and low-intensity electromagnetic fields	Electromagnetic Biology and Medicine	2011	N	Not MS
Bolbocean O.	Motor evoked potentials modification in different forms and stages of multiple sclerosis	Romanian Journal of Neurology/ Revista Romana de Neurologie	2009	Y
Bonfiglio L., Rossi B., Sartucci F.	Prolonged intracortical delay of long-latency reflexes: Electrophysiological evidence for a cortical dysfunction in multiple sclerosis	Brain Research Bulletin	2006	Y
Boniface SJ, Schubert M, Mills KR.	Suppression and long latency excitation of single spinal motoneurons by transcranial magnetic stimulation in health, multiple sclerosis, and stroke	Muscle Nerve	1994	Y
Bonzano L.	Hand motor performance as a new quantitative clinical endpoint in MS: Longitudinal evaluation in patients with CIS and correlation with accumulation of disability and tissue integrity at MRI	Multiple Sclerosis	2016	Y
Borders J.C., Brates D.	Use of the Penetration-Aspiration Scale in Dysphagia Research: A Systematic Review	Dysphagia	2020	N	Not MS
Borenstein D.G., Wiesel S.W., Scott D., Boden M.B.	Low Back and Neck Pain: Comprehensive Diagnosis and Management: Third Edition	Low Back and Neck Pain: Comprehensive Diagnosis and Management: Third Edition	2004	N	Not MS
Boroojerdi B., Hungs M., Mull M., Töpper R., Noth J.	Interhemispheric inhibition in patients with multiple sclerosis	Electroencephalography and Clinical Neurophysiology - Electromyography and Motor Control	1998	Y
Borragán G., Gilson M., Guerrero-Mosquera C., Di Ricci E., Slama H., Peigneux P.	Transcranial direct current stimulation does not counteract cognitive fatigue, but induces sleepiness and an inter-hemispheric shift in brain oxygenation	Frontiers in Psychology	2018	N	Not TMS
Borsook D.	Neurological diseases and pain	Brain	2012	N	Not MS
Brandt T., Dieterich M., Strupp M.	Vertigo and dizziness: Common complaints, second edition	Vertigo and Dizziness: Common Complaints	2013	N	Not MS
Braune H.J., Fritz C.	Transcranial magnetic stimulation-evoked inhibition of voluntary muscle activity (silent period) is impaired in patients with ischemic hemispheric lesion	Stroke	1995	N	Not MS
Braune H.-J., Fritz C.	Asymmetry of silent period evoked by transcranial magnetic stimulation in stroke patients	Acta Neurologica Scandinavica	1996	N	Not MS
Braverman E.R., Blum K.	P300 (Latency) Event-Related Potential: An Accurate Predictor of Memory Impairment	Clinical EEG and Neuroscience	2003	N	Not MS
Brazis P.W., Masdeu J.C., Biller J.	Localization in clinical neurology: Sixth edition	Localization in Clinical Neurology: Sixth Edition	2012	N	Not MS
Brewer R., Murphy J., Bird G.	Atypical interoception as a common risk factor for psychopathology: A review	Neuroscience and Biobehavioral Reviews	2021	N	Not original research
Brinciotti M.	The use of evoked potentials in tuberous sclerosis [L'impiego dei potenziali evocati nella sclerosi tuberosa]	Rivista di Neuroradiologia	2003	N	Not MS
Brodsky M.C.	Pediatric neuro-ophthalmology, third edition	Pediatric Neuro-Ophthalmology, Third Edition	2016	N	Not MS
Brostrøm S.	Motor Evoked Potentials From the Pelvic Floor	Neurourology and Urodynamics	2003	N	Not MS
Brown KE, Neva JL, Ledwell NM, Boyd LA.	Use of transcranial magnetic stimulation in the treatment of selected movement disorders	Degener Neurol Neuromuscul Dis	2014	N	Not original research
Brunoni A.R., Fregni F., Pagano R.L.	Translational research in transcranial direct current stimulation (tDCS): A systematic review of studies in animals	Reviews in the Neurosciences	2011	N	Not original research
Brust J.	Neurological Aspects of Substance Abuse: Second Edition	Neurological Aspects of Substance Abuse: Second Edition	2004	N	Not MS
Buckley P., Prewette D., Bird J., Harrison G.	Examination notes in psychiatry, Fourth edition	Examination Notes in Psychiatry, Fourth Edition	2004	N	Not MS
Bühler R, Magistris MR, Truffert A, Hess CW, Rösler KM.	The triple stimulation technique to study central motor conduction to the lower limbs	Clin Neurophysiol	2001	N	Not MS
Burke M.J., Fried P.J., Pascual-Leone A.	Transcranial magnetic stimulation: Neurophysiological and clinical applications	Handbook of Clinical Neurology	2019	N	Not MS
Burke W.	The charles bonnet syndrome	Secondary Schizophrenia	2010	N	Not MS
Bustillo-Casero P., Cebrian-Bou S., Cruz-Montecinos C., Pardo A., García-Massó X.	Effects of A Dual-Task Intervention in Postural Control and Cognitive Performance in Adolescents	Journal of Motor Behavior	2020	N	Not TMS
Buzsáki G.	Rhythms of the Brain	Rhythms of the Brain	2009	N	Not TMS
Cabib C., Llufriu S., Martinez-Heras E., Saiz A., Valls-Solé J.	Enhanced mirror activity in 'crossed' reaction time tasks in multiple sclerosis	Clinical Neurophysiology	2016	Y
Cabib, C; Llufriu, S; Casanova-Molla, J; Saiz, A; Valls-Sole, J	Defective sensorimotor integration in preparation for reaction time tasks in patients with multiple sclerosis	JOURNAL OF NEUROPHYSIOLOGY	2015	Y
Cammisuli D.M., Cignoni F., Ceravolo R., Bonuccelli U., Castelnuovo G.	Transcranial Direct Current Stimulation (tDCS) as a Useful Rehabilitation Strategy to Improve Cognition in Patients With Alzheimer's Disease and Parkinson's Disease: An Updated Systematic Review of Randomized Controlled Trials	Frontiers in Neurology	2022	N	Not TMS
Canavero S., Bonicalzi V.	Central pain syndrome: Pathophysiology, diagnosis and management, second edition	Central Pain Syndrome: Pathophysiology, Diagnosis and Management, Second Edition	2011	N	Not MS
Cancelli A., Cottone C., Tecchio F., Truong D.Q., Dmochowski J., Bikson M.	A simple method for EEG guided transcranial electrical stimulation without models	Journal of Neural Engineering	2016	N	Not TMS
Cao Q., He Q., Wang Y., Cheng X., Howard R.M., Zhang Y., DeVries W.H., Shields C.B., Magnuson D.S.K., Xu X.-M., Kim D.H., Whittemore S.R.	Transplantation of ciliary neurotrophic factor-expressing adult oligodendrocyte precursor cells promotes remyelination and functional recovery after spinal cord injury	Journal of Neuroscience	2010	N	Not MS
Cao Q., Zhang Y.P., Iannotti C., DeVries W.H., Xu X.-M., Shields C.B., Whittemore S.R.	Functional and electrophysiological changes after graded traumatic spinal cord injury in adult rat	Experimental Neurology	2005	N	Not MS
Caplan L.R.	Caplan's Stroke: A Clinical Approach: Fourth Edition	Caplan's Stroke: A Clinical Approach: Fourth Edition	2009	N	Not MS
Caplan L.R.	Vertebrobasilar ischemia and hemorrhage: Clinical findings, diagnosis, and management of posterior circulation disease, second edition	Vertebrobasilar Ischemia and Hemorrhage: Clinical Findings, Diagnosis, and Management of Posterior Circulation Disease, Second Edition	2015	N	Not MS
Cappon D., den Boer T., Jordan C., Yu W., Lo A., LaGanke N., Biagi M.C., Skorupinski P., Ruffini G., Morales O., Metzger E., Manor B., Pascual-Leone A.	Safety and Feasibility of Tele-Supervised Home-Based Transcranial Direct Current Stimulation for Major Depressive Disorder	Frontiers in Aging Neuroscience	2022	N	Not MS
Cárdenas-Morales L., Nowak D.A., Kammer T., Wolf R.C., Schönfeldt-Lecuona C.	Mechanisms and applications of theta-burst rTMS on the human motor cortex	Brain Topography	2010	N	Not MS
Carpenter J.S., Crouse J.J., Scott E.M., Naismith S.L., Wilson C., Scott J., Merikangas K.R., Hickie I.B.	Circadian depression: A mood disorder phenotype	Neuroscience and Biobehavioral Reviews	2021	N	Not MS
Carson A.J., Brown R., David A.S., Duncan R., Edwards M.J., Goldstein L.H., Grunewald R., Howlett S., Kanaan R., Mellers J., Nicholson T.R., Reuber M., Schrag A.-E., Stone J., Voon V.	Functional (conversion) neurological symptoms: Research since the millennium	Journal of Neurology, Neurosurgery and Psychiatry	2012	N	Not MS
Carter A., Hall W.	Addiction Neuroethics: The promises and perils of neuroscience research on addiction	Addiction Neuroethics: The Promises and Perils of Neuroscience Research on Addiction	2011	N	Not MS
Carter G.T., Abood M.E., Aggarwal S.K., Weiss M.D.	Cannabis and amyotrophic lateral sclerosis: Hypothetical and practical applications, and a call for clinical trials	American Journal of Hospice and Palliative Medicine	2010	N	Not MS
Cassidy L., Taylor D., Harris C.	Abnormal supranuclear eye movements in the child: A practical guide to examination and interpretation	Survey of Ophthalmology	2000	N	Not adults
Castel-Lacanal E.	Sites of electrical stimulation used in neurology	Annals of Physical and Rehabilitation Medicine	2015	N	Not MS
Cattaneo L., Pavesi G.	The facial motor system	Neuroscience and Biobehavioral Reviews	2014	N	Not original research
Caulfield K.A., Badran B.W., DeVries W.H., Summers P.M., Kofmehl E., Li X., Borckardt J.J., Bikson M., George M.S.	Transcranial electrical stimulation motor threshold can estimate individualized tDCS dosage from reverse-calculation electric-field modeling	Brain Stimulation	2020	N	Not TMS
Cervetto L., Demontis G.C., Gargini C.	Cellular mechanisms underlying the pharmacological induction of phosphenes	British Journal of Pharmacology	2007	N	Not MS
Chae, KS; Kim, YH	Potential Impact of Geomagnetic Field in Transcranial Magnetic Stimulation for the Treatment of Neurodegenerative Diseases	FRONTIERS IN HUMAN NEUROSCIENCE	2017	N	Not original research
Chaitow L., Brown H., Lewis D.C., Neary D.E., Turner R.N., Maeckel L., Youngs B.K., Buratovich N.	Modalities, Methods and Techniques	Naturopathic Physical Medicine	2008	N	Not TMS
Chalah, MA; Lefaucheur, JP; Creange, A; Ayache, SS	Cortical excitability and alexithymia in multiple sclerosis: a transcranial magnetic stimulation study	MULTIPLE SCLEROSIS JOURNAL	2017	Y
Chalah, MA; Palm, U; Lefaucheur, JP; Creange, A; Ayache, SS	Interhermispheric inhibition predicts anxiety levels in multiple sclerosis: A corticospinal excitability study	BRAIN RESEARCH	2018	Y
Chalah, MA; Riachi, N; Ahdab, R; Creange, A; Lefaucheur, JP; Ayache, SS	Fatigue in Multiple Sclerosis: Neural Correlates and the Role of Non-Invasive Brain Stimulation	FRONTIERS IN CELLULAR NEUROSCIENCE	2015	Y
Charlet De Sauvage R., Grattepanche F., Cassand P., Caubet R., Moreau J.M.	Safety of the magnetic field generated by a neuronal magnetic stimulator: Evaluation of possible mutagenic effects	Clinical Neurophysiology	2003	N	Not MS
Charvet L., Shaw M., Dobbs B., Frontario A., Sherman K., Bikson M., Datta A., Krupp L., Zeinapour E., Kasschau M.	Remotely Supervised Transcranial Direct Current Stimulation Increases the Benefit of At-Home Cognitive Training in Multiple Sclerosis	Neuromodulation	2018	Y
Chaves A.R.	Asymmetry of Brain Excitability: A New Biomarker that Predicts Objective and Subjective Symptoms in Multiple Sclerosis	Behavioural Brain Research	2019	Y
Chaves AR, Kenny HM, Snow NJ, Pretty RW, Ploughman M.	Sex-specific disruption in corticospinal excitability and hemispheric (a)symmetry in multiple sclerosis	Brain Res	2021	Y
Chaves, AR; Devasahayam, AJ; Riemenschneider, M; Pretty, RW; Ploughman, M	Walking Training Enhances Corticospinal Excitability in Progressive Multiple Sclerosis-A Pilot Study	FRONTIERS IN NEUROLOGY	2020	Y
Chaves, AR; Kelly, LP; Moore, CS; Stefanelli, M; Ploughman, M	Prolonged cortical silent period is related to poor fitness and fatigue, but not tumor necrosis factor, in Multiple Sclerosis	CLINICAL NEUROPHYSIOLOGY	2019	Y
Chaves, AR; Kenny, HM; Snow, NJ; Pretty, RW; Ploughman, M	Sex-specific disruption in corticospinal excitability and hemispheric (a) symmetry in multiple sclerosis	BRAIN RESEARCH	2021	Y
Chen R.	Diagnostic utility of TMS	Clinical Neurophysiology	2014	Y
Chen R., Canales A., Anikeeva P.	Neural recording and modulation technologies	Nature Reviews Materials	2017	N	Not original research
Chen R., Corwell B., Hallett M.	Modulation of motor cortex excitability by median nerve and digit stimulation	Experimental Brain Research	1999	N	Not MS
Chen R., Petrescu N.	Diagnostic and therapeutic role of magnetic stimulation in neurology	Aminoff's Electrodiagnosis in Clinical Neurology	2012	Y
Chen Z., Tie Y., Olubiyi O., Zhang F., Mehrtash A., Rigolo L., Kahali P., Norton I., Pasternak O., Rathi Y., Golby A.J., O’Donnell L.J.	Corticospinal tract modeling for neurosurgical planning by tracking through regions of peritumoral edema and crossing fibers using two-tensor unscented Kalman filter tractography	International Journal of Computer Assisted Radiology and Surgery	2016	N	Not MS
Chen, ML; Yao, L; Boger, J; Mercer, K; Thompson, B; Jiang, N	Non-invasive brain stimulation interventions for management of chronic central neuropathic pain: a scoping review protocol	BMJ OPEN	2017	N	Not original research
Chen, R; Cros, D; Curra, A; Di Lazzaro, V; Lefaucheur, JP; Magistris, MR; Mills, K; Roesler, KM; Triggs, WJ; Ugawa, Y; Ziemann, U	The clinical diagnostic utility of transcranial magnetic stimulation: Report of an IFCN committee	CLINICAL NEUROPHYSIOLOGY	2008	Y
Cheshire Jr. W.P.	Trigeminal neuralgia: For one nerve a multitude of treatments	Expert Review of Neurotherapeutics	2007	N	Not original research
Chiang H.-S., Motes M., O'Hair R., Vanneste S., Kraut M., Hart J., Jr.	Baseline delayed verbal recall predicts response to high definition transcranial direct current stimulation targeting the superior medial frontal cortex	Neuroscience Letters	2021	N	Not MS
Chieffo R., Comi G., Leocani L.	Noninvasive Neuromodulation in Poststroke Gait Disorders:Rationale, Feasibility, and State of the Art	Neurorehabilitation and Neural Repair	2016	N	Not MS
Choi Y.-H., Jung S.-J., Lee C.H., Lee S.-U.	Additional effects of transcranial direct-current stimulation and trigger-point injection for treatment of myofascial pain syndrome: A pilot study with randomized, single-blinded trial	Journal of Alternative and Complementary Medicine	2014	N	Not MS
Christensen L.O.D., Petersen N., Andersen J.B., Sinkjær T., Nielsen J.B.	Evidence for transcortical reflex pathways in the lower limb of man	Progress in Neurobiology	2000	N	Not MS
Christiansen L., Siebner H.R.	Tools to explore neuroplasticity in humans: Combining interventional neurophysiology with functional and structural magnetic resonance imaging and spectroscopy	Handbook of Clinical Neurology	2022	N	Not original research
Christidi F., Migliaccio R., Santamaría-García H., Santangelo G., Trojsi F.	Social cognition dysfunctions in neurodegenerative diseases: Neuroanatomical correlates and clinical implications	Behavioural Neurology	2018	N	Not TMS
Clark D.L., Boutros N.N., Mendez M.F.	The brain and behavior: An introduction to behavioral neuroanatomy	The Brain and Behavior: An Introduction to Behavioral Neuroanatomy	2018	N	Not original research
Classen J.	Finger joint covariance patterns of TMS-evoked movements: A window into mechanisms of neural encoding of skills	Clinical Neurophysiology	2011	N	Not MS
Claus D., Brunhölzl C., Kerling F.P., Henschel S.	Transcranial magnetic stimulation as a diagnostic and prognostic test in amyotrophic lateral sclerosis	Journal of the Neurological Sciences	1995	N	Not MS
Clayton A.	Proceedings #42: A Case Series of Long-Term Open- Label Remotely Supervised Transcranial Direct Current Stimulation (RS-tDCS) in Neurologic Disorder Comorbidities	Brain Stimulation	2019	N	Not MS
Coco-Martin M.B., Piñero D.P., Leal-Vega L., Hernández-Rodríguez C.J., Adiego J., Molina-Martín A., De Fez D., Arenillas J.F.	The Potential of Virtual Reality for Inducing Neuroplasticity in Children with Amblyopia	Journal of Ophthalmology	2020	N	Not MS
Cohen R.A.	The neuropsychology of attention: Second edition	The Neuropsychology of Attention: Second Edition	2013	N	Not MS
Cohen-Adad J., El Mendili M.-M., Lehéricy S., Pradat P.-F., Blancho S., Rossignol S., Benali H.	Demyelination and degeneration in the injured human spinal cord detected with diffusion and magnetization transfer MRI	NeuroImage	2011	N	Not MS
Cohen-Adad J., Leblond H., Delivet-Mongrain H., Martinez M., Benali H., Rossignol S.	Wallerian degeneration after spinal cord lesions in cats detected with diffusion tensor imaging	NeuroImage	2011	N	Not humans
Cohen-Adad J., Mendili M.-M.E., Morizot-Koutlidis R., Lehéricy S., Meininger V., Blancho S., Rossignol S., Benali H., Pradat P.-F.	Involvement of spinal sensory pathway in ALS and specificity of cord atrophy to lower motor neuron degeneration	Amyotrophic Lateral Sclerosis and Frontotemporal Degeneration	2013	N	Not MS
Committee on the Assessment of Ongoing Efforts in the Treatment of Posttraumatic Stress Disorder, Board on the Health of Select Populations, Institute of Medicine	Treatment for Posttraumatic Stress Disorder in Military and Veteran Populations: Initial Assessment	Treatment for Posttraumatic Stress Disorder in Military and Veteran Populations: Initial Assessment	2012	N	Not MS
Compston A., McDonald I., Noseworthy J., Lassmann H., Miller D., Smith K., Wekerle H., Confavreux C.	McAlpine's Multiple Sclerosis	McAlpine's Multiple Sclerosis	2006	Y
Conta G., Libanori A., Tat T., Chen G., Chen J.	Triboelectric Nanogenerators for Therapeutic Electrical Stimulation	Advanced Materials	2021	N	Not MS
Cosottini M., Donatelli G., Costagli M., Caldarazzo Ienco E., Frosini D., Pesaresi I., Biagi L., Siciliano G., Tosetti M.	High-resolution 7T MR imaging of the motor cortex in amyotrophic lateral sclerosis	American Journal of Neuroradiology	2016	N	Not MS
Costa T.L., Lapenta O.M., Boggio P.S., Ventura D.F.	Transcranial direct current stimulation as a tool in the study of sensory-perceptual processing	Attention, Perception, and Psychophysics	2015	N	Not MS
Cotes J.E., Chinn D.J., Miller M.R.	Lung Function: Physiology, Measurement and Application in Medicine, Sixth Edition	Lung Function: Physiology, Measurement and Application in Medicine, Sixth Edition	2009	N	Not MS
Créange A, Lefaucheur JP, Balleyguier MO, Galactéros F.	Iron depletion induced by bloodletting and followed by rhEPO administration as a therapeutic strategy in progressive multiple sclerosis: a pilot, open-label study with neurophysiological measurements	Neurophysiol Clin	2013	Y
Crivelli D, Pedullà L, Bisio A, Rueda MDS, Brichetto G, Bove M, Balconi M.	When "Extraneous" Becomes "Mine". Neurophysiological Evidence of Sensorimotor Integration During Observation of Suboptimal Movement Patterns Performed by People with Multiple Sclerosis	Neuroscience	2018	Y
Cruccu G., Deuschl G.	The clinical use of brainstem reflexes and hand-muscle reflexes	Clinical Neurophysiology	2000	N	Not MS
Cruccu G., Truini A.	Diseases of cranial nerves and brainstem	Handbook of Clinical Neurophysiology	2006	N	Not original research
Cruciani R.A., Strada E.A., Knotkova H.	Neuropathic pain	Cancer Pain: Assessment and Management, Second Edition	2009	N	Not MS
Cucurachi L, Immovilli P, Granella F, Pavesi G, Cattaneo L.	Short-latency afferent inhibition predicts verbal memory performance in patients with multiple sclerosis	J Neurol	2008	Y
Cummings L.	The Cambridge handbook of communication disorders	The Cambridge Handbook of Communication Disorders	2015	N	Not original research
Curra, A; Modugno, N; Inghilleri, M; Manfredi, M; Hallett, M; Berardelli, A	Transcranial magnetic stimulation techniques in clinical investigation	NEUROLOGY	2002	Y
Curtin A., Ayaz H., Tang Y., Sun J., Wang J., Tong S.	Enhancing neural efficiency of cognitive processing speed via training and neurostimulation: An fNIRS and TMS study	NeuroImage	2019	N	Not MS
Cuypers K., Marsman A.	Transcranial magnetic stimulation and magnetic resonance spectroscopy: Opportunities for a bimodal approach in human neuroscience	NeuroImage	2021	N	Not MS
Czéh B.	Clinical findings documenting cellular and molecular abnormalities of glia in depressive disorders	Frontiers in Molecular Neuroscience	2018	N	Not MS
Damborská A., Piguet C., Aubry J.-M., Dayer A.G., Michel C.M., Berchio C.	Altered Electroencephalographic Resting-State Large-Scale Brain Network Dynamics in Euthymic Bipolar Disorder Patients	Frontiers in Psychiatry	2019	N	Not MS
Dan B., Christiaens F., Christophe C., Dachy B.	Transcranial magnetic stimulation and other evoked potentials in pediatric multiple sclerosis	Pediatric Neurology	2000	N	Not adults
Day, MA; Ehde, DM; Burns, J; Ward, LC; Friedly, JL; Thorn, BE; Ciol, MA; Mendoza, E; Chan, JF; Battalio, S; Borckardt, J; Jensen, MP	A randomized trial to examine the mechanisms of cognitive, behavioral and mindfulness-based psychosocial treatments for chronic pain: Study protocol	CONTEMPORARY CLINICAL TRIALS	2020	N	Not MS
De Gennaro, L; Ferrara, M; Bertini, M; Pauri, F; Cristiani, R; Curcio, G; Romei, V; Fratello, F; Rossini, PM	Reproducibility of callosal effects of transcranial magnetic stimulation (TMS) with interhemispheric paired pulses	NEUROSCIENCE RESEARCH	2003	N	Not MS
de la Monte S.M., Kay J., Yalcin E.B., Kril J.J., Sheedy D., Sutherland G.T.	Imaging mass spectrometry of frontal white matter lipid changes in human alcoholics	Alcohol	2018	N	Not MS
De Marinis M., Rinalduzzi S., Accornero N.	Impairment in color perception in migraine with and without aura	Headache	2007	N	Not MS
de Oliveira D.R., da Silva D.M., Florentino I.F., de Brito A.F., Fajemiroye J.O., da Silva D.P.B., da Rocha F.F., Costa E.A., Galdino P.M.	Monoamine involvement in the antidepressant-like effect of ?-caryophyllene	CNS and Neurological Disorders - Drug Targets	2018	N	Not TMS
de Paleville D.G.L.T., McKay W.B., Folz R.J., Ovechkin A.V.	Respiratory Motor Control Disrupted by Spinal Cord Injury: Mechanisms, Evaluation, and Restoration	Translational Stroke Research	2011	N	Not MS
De Ridder D., Stöckl T., To W.T., Langguth B., Vanneste S.	Noninvasive Transcranial Magnetic and Electrical Stimulation: Working Mechanisms	Rhythmic Stimulation Procedures in Neuromodulation	2017	N	Not MS
de Tommaso M., Betti V., Bocci T., Bolognini N., Di Russo F., Fattapposta F., Ferri R., Invitto S., Koch G., Miniussi C., Piccione F., Ragazzoni A., Sartucci F., Rossi S., Arcara G., Berchicci M., Bianco V., Delussi M., Gentile E., Giovannelli F., Mannarelli D., Marino M., Mussini E., Pauletti C., Pellicciari M.C., Pisoni A., Raggi A., Valeriani M.	Pearls and pitfalls in brain functional analysis by event-related potentials: a narrative review by the Italian Psychophysiology and Cognitive Neuroscience Society on methodological limits and clinical reliability—part I	Neurological Sciences	2020	N	Not original research
Decimo I., Bifari F., Krampera M., Fumagalli G.	Neural stem cell niches in health and diseases	Current Pharmaceutical Design	2012	N	Not TMS
Deelchand D.K., Ho M.-L., Nestrasil I.	Ultra-High-Field Imaging of the Pediatric Brain and Spinal Cord	Magnetic Resonance Imaging Clinics of North America	2021	N	Not TMS
Demirtas-Tatlidede A., Vahabzadeh-Hagh A.M., Pascual-Leone A.	Can noninvasive brain stimulation enhance cognition in neuropsychiatric disorders?	Neuropharmacology	2013	N	Not MS
Deng X., Yang Z., Liu R., Yi M., Lei D., Wang Z., Zhao H.	The maximum tolerated dose of gamma radiation to the optic nerve during gamma knife radiosurgery in an animal study	Stereotactic and Functional Neurosurgery	2013	N	Not humans
Desiato, MT; Caramia, MD	Towards a neurophysiological marker of amyotrophic lateral sclerosis as revealed by changes in cortical excitability	ELECTROMYOGRAPHY AND MOTOR CONTROL-ELECTROENCEPHALOGRAPHY AND CLINICAL NEUROPHYSIOLOGY	1997	N	Not MS
Despard J., Ternes A.-M., Dimech-Betancourt B., Poudel G., Churchyard A., Georgiou-Karistianis N.	Characterising upper limb movements in Huntington's disease and the impact of restricted visual cues	PLoS ONE	2015	N	Not MS
Dharmadasa T.	Cortical excitability across the ALS clinical motor phenotypes	Brain Sciences	2021	N	Not MS
Dharmadasa T., Matamala J.M., Huynh W., Zoing M.C., Kiernan M.C.	Motor neurone disease	Handbook of Clinical Neurology	2018	N	Not MS
Di Lazzaro V., Bella R., Benussi A., Bologna M., Borroni B., Capone F., Chen K.-H.S., Chen R., Chistyakov A.V., Classen J., Kiernan M.C., Koch G., Lanza G., Lefaucheur J.-P., Matsumoto H., Nguyen J.-P., Orth M., Pascual-Leone A., Rektorova I., Simko P., Taylor J.-P., Tremblay S., Ugawa Y., Dubbioso R., Ranieri F.	Diagnostic contribution and therapeutic perspectives of transcranial magnetic stimulation in dementia	Clinical Neurophysiology	2021	N	Not MS
Di Lazzaro, V; Oliviero, A; Profice, P; Ferrara, L; Saturno, E; Pilato, F; Tonali, P	The diagnostic value of motor evoked potentials	CLINICAL NEUROPHYSIOLOGY	1999	Y
Di Pede C., Mantovani M.E., Del Felice A., Masiero S.	Dysphagia in the elderly: focus on rehabilitation strategies	Aging Clinical and Experimental Research	2016	N	Not MS
Di Sapio A.	Motor evoked potentials from multiple recording sites of the lower limbs as a monitoring tool of central motor function in MS relapsing patients	Multiple Sclerosis	2014	Y
Di Sapio A.	Peripheral and central conduction time to proximal and distal muscle districts of lower limbs: Methodological aspects and clinical application in Multiple Sclerosis patients	Multiple Sclerosis	2010	Y
Dobkin B.H.	Behavioral, temporal, and spatial targets for cellular transplants as adjuncts to rehabilitation for stroke	Stroke	2007	N	Not MS
Dolcetta D.	Myelin deterioration in twitcher mice: Motor evoked potentials and magnetic resonance imaging as in vivo monitoring tools	Journal of Neuroscience Research	2005	N	Not humans
Donzé C.	Update on rehabilitation in multiple sclerosis	Presse Medicale	2015	Y
Doskas T., Vavougios G.D., Karampetsou P., Kormas C., Synadinakis E., Stavrogianni K., Sionidou P., Serdari A., Vorvolakos T., Iliopoulos I., Vadikolias ?.	Neurocognitive impairment and social cognition in multiple sclerosis	International Journal of Neuroscience	2021	Y
DosSantos M.F., Holanda-Afonso R.C., Lima R.L., DaSilva A.F., Moura-Neto V.	The role of the blood–brain barrier in the development and treatment of migraine and other pain disorders	Frontiers in Cellular Neuroscience	2014	N	Not MS
Douglas E.A., Edwards J.D., Goodyear B.G.	Longitudinal functional MRI of motor and cognitive recovery following stroke: A review	Current Medical Imaging Reviews	2006	N	Not MS
Douw L., Quaak M., Fitzsimmons S.M.D.D., de Wit S.J., van der Werf Y.D., van den Heuvel O.A., Vriend C.	Static and dynamic network properties of the repetitive transcranial magnetic stimulation target predict changes in emotion regulation in obsessive-compulsive disorder	Brain Stimulation	2020	N	Not MS
Douw L., van Dellen E., Gouw A.A., Griffa A., de Haan W., van den Heuvel M., Hillebrand A., Van Mieghem P., Nissen I.A., Otte W.M., Reijmer Y.D., Schoonheim M.M., Senden M., van Straaten E.C.W., Tijms B.M., Tewarie P., Stam C.J.	The road ahead in clinical network neuroscience	Network Neuroscience	2019	N	Not original research
Dragic M., Zeljkovic M., Stevanovic I., Ilic T., Ilic N., Nedeljkovic N., Ninkovic M.	Theta burst stimulation ameliorates symptoms of experimental autoimmune encephalomyelitis and attenuates reactive gliosis	Brain Research Bulletin	2020	N	Not MS
Dubbioso R.	Different cortical excitability profiles in hereditary brain iron and copper accumulation	Neurological Sciences	2020	N	Not MS
Durlach J., Pagès N., Bac P., Bara M., Guiet-Bara A.	Headache due to photosensitive magnesium depletion	Magnesium Research	2005	N	Not MS
Dvorak A.V., Ljungberg E., Vavasour I.M., Liu H., Johnson P., Rauscher A., Kramer J.L.K., Tam R., Li D.K.B., Laule C., Barlow L., Briemberg H., MacKay A.L., Traboulsee A., Kozlowski P., Cashman N., Kolind S.H.	Rapid myelin water imaging for the assessment of cervical spinal cord myelin damage	NeuroImage: Clinical	2019	N	No TMS
Ebrahimzadeh E., Asgarinejad M., Saliminia S., Ashoori S., Seraji M.	Predicting clinical response to transcranial magnetic stimulation in major depression using time-frequency eeg signal processing	Biomedical Engineering - Applications, Basis and Communications	2021	N	Not MS
Eddy C.M.	What do you have in mind? Measures to assess mental state reasoning in neuropsychiatric populations	Frontiers in Psychiatry	2019	N	Not MS
Edelmuth R.C.L., Nitsche M.A., Battistella L., Fregni F.	Why do some promising brain-stimulation devices fail the next steps of clinical development?	Expert Review of Medical Devices	2010	N	Not original research
Eggermont J.J.	The Neuroscience of Tinnitus	The Neuroscience of Tinnitus	2012	N	Not MS
Eichert N., Papp D., Mars R.B., Watkins K.E.	Mapping human laryngeal motor cortex during vocalization	Cerebral Cortex	2020	N	Not MS
Eisen A.A.	AAEM minimonograph #35: Clinical experience with transcranial magnetic stimulation	Muscle and Nerve	1990	Y
Elias G.J.B., Namasivayam A.A., Lozano A.M.	Deep brain stimulation for stroke: Current uses and future directions	Brain Stimulation	2018	N	Not MS
Ellwardt E.	Network alterations underlying anxiety symptoms in early multiple sclerosis	Multiple Sclerosis Journal	2021	Y
Enck P., Klosterhalfen S.	Does sex/gender play a role in placebo and nocebo effects? Conflicting evidence from clinical trials and experimental studies	Frontiers in Neuroscience	2019	N	Not MS
Erdem N.?., Uslu F.?., Bozkurt S., Uysal H.	Relationship between diaphragm MEP and swallowing, respiratory function and survive in ALS patients	Neurological Sciences and Neurophysiology	2019	N	Not MS
Escribano, BM; Colin-Gonzalez, AL; Santamaria, A; Tunez, I	The Role of Melatonin in Multiple Sclerosis, Huntington's Disease and Cerebral Ischemia	CNS & NEUROLOGICAL DISORDERS-DRUG TARGETS	2014	N	No TMS
Estes S.P., Iddings J.A., Field-Fote E.C.	Priming neural circuits to modulate spinal reflex excitability	Frontiers in Neurology	2017	N	Not MS
Fabig S.-C., Kersebaum D., Sendel M., Gierthmühlen J., Baron R.	Diagnosis and therapy of neuropathic pain [Diagnostik und Therapie neuropathischer Schmerzen]	Nervenheilkunde	2021	N	Not English
Faig J., Busse O.	Silent period evoked by transcranial magnetic stimulation in unilateral thalamic infarcts	Journal of the Neurological Sciences	1996	N	Not MS
Fakolade A., Bisson E.J., Pétrin J., Lamarre J., Finlayson M.	Effect of comorbidities on outcomes of neurorehabilitation interventions in multiple sclerosis: A scoping review	International Journal of MS Care	2016	Y
Falup-Pecurariu C., Ferreira J., Martinez-Martin P., Chaudhuri K.R.	Movement Disorders Curricula	Movement Disorders Curricula	2017	N	No TMS
Fantini S., Sassaroli A.	Frequency-Domain Techniques for Cerebral and Functional Near-Infrared Spectroscopy	Frontiers in Neuroscience	2020	N	No TMS
Farooqui A.A.	Ischemic and traumatic brain and spinal cord injuries: Mechanisms and potential therapies	Ischemic and Traumatic Brain and Spinal Cord Injuries: Mechanisms and Potential Therapies	2018	N	Not MS
Farooqui A.A.	Molecular mechanisms of dementia: Biomarkers, neurochemistry, and therapy	Molecular Mechanisms of Dementia: Biomarkers, Neurochemistry, and Therapy	2019	N	Not MS
Fatih P.	A Systematic Review of Long-Interval Intracortical Inhibition as a Biomarker in Neuropsychiatric Disorders	Frontiers in Psychiatry	2021	N	Not MS
Fedorov A., Jobke S., Bersnev V., Chibisova A., Chibisova Y., Gall C., Sabel B.A.	Restoration of vision after optic nerve lesions with noninvasive transorbital alternating current stimulation: A clinical observational study	Brain Stimulation	2011	N	No TMS
Feistner, H; Awiszus, F; Sailer, M; Hinrichs, H; Heinze, HJ	Method for rapid response estimation of single human motoneurons to transcranial magnetic and peripheral electrical stimulation	EEG-EMG-ZEITSCHRIFT FUR ELEKTROENZEPHALOGRAPHIE ELEKTROMYOGRAPHIE UND VERWANDTE GEBIETE	1996	N	Not MS
Fernandez, V	The Use of Motor-Evoked Potentials in Clinical Trials in Multiple Sclerosis	JOURNAL OF CLINICAL NEUROPHYSIOLOGY	2021	Y
Fernandez, V; Valls-Sole, J; Relova, JL; Raguer, N; Miralles, F; Dinca, L; Taramundi, S; Costa-Frossardo, L; Ferrandiz, M; Ramio-Torrenta, L; Villoslada, P; Saiz, A; Callesef, C; Antiguedad, A; Alvarez-Cermeno, JC; Prieto, JM; Izquierdo, G; Montalban, X; Fernandez, Y	Recommendations for the clinical use of motor evoked potentials in multiple sclerosis	NEUROLOGIA	2013	Y
Fernández-Corazza M., Turovets S., Luu P., Anderson E., Tucker D.	Transcranial electrical neuromodulation based on the reciprocity principle	Frontiers in Psychiatry	2016	N	Not MS
Fernández-Corazza M., Turovets S., Muravchik C.H.	Unification of optimal targeting methods in transcranial electrical stimulation	NeuroImage	2020	N	Not MS
Ferrazzano G.	Early diagnosis of secondary progressive multiple sclerosis: focus on fluid and neurophysiological biomarkers	Journal of Neurology	2021	Y
Ferris J.K., Neva J.L., Vavasour I.M., Attard K.J., Greeley B., Hayward K.S., Wadden K.P., MacKay A.L., Boyd L.A.	Cortical N-acetylaspartate concentrations are impacted in chronic stroke but do not relate to motor impairment: A magnetic resonance spectroscopy study	Human Brain Mapping	2021	N	Not MS
Fiander M.D.J., Stifani N., Nichols M., Akay T., Robertson G.S.	Kinematic gait parameters are highly sensitive measures of motor deficits and spinal cord injury in mice subjected to experimental autoimmune encephalomyelitis	Behavioural Brain Research	2017	N	Not humans
Fierro B, Salemi G, Brighina F, Buffa D, Conte S, La Bua V, Piazza A, Savettieri G.	A transcranial magnetic stimulation study evaluating methylprednisolone treatment in multiple sclerosis	Acta Neurol Scand	2002	Y
Filley C.M.	White matter dementia	White Matter Dementia	2016	N	Not MS
Finnerup N.B.	A review of central neuropathic pain states	Current Opinion in Anaesthesiology	2008	N	Not MS
Finsterer, J; Zarrouk-Mahjoub, S	Involvement of the Spinal Cord in Mitochondrial Disorders	JOURNAL OF NEUROSCIENCES IN RURAL PRACTICE	2018	N	Not MS
Fisher, BE; Lee, YY; Pitsch, EA; Moore, B; Southam, A; Faw, TD; Powers, CM	Method for Assessing Brain Changes Associated With Gluteus Maximus Activation	JOURNAL OF ORTHOPAEDIC & SPORTS PHYSICAL THERAPY	2013	N	Not MS
Fling, BW; Benson, BL; Seidler, RD	Transcallosal sensorimotor fiber tract structure-function relationships	HUMAN BRAIN MAPPING	2013	N	Not MS
Fornito A., Zalesky A., Breakspear M.	The connectomics of brain disorders	Nature Reviews Neuroscience	2015	N	Not original research
Forstenpointner J., Berry D., Baron R., Borsook D.	The cornucopia of central disinhibition pain – An evaluation of past and novel concepts	Neurobiology of Disease	2020	N	Not MS
Fox M.D., Halko M.A., Eldaief M.C., Pascual-Leone A.	Measuring and manipulating brain connectivity with resting state functional connectivity magnetic resonance imaging (fcMRI) and transcranial magnetic stimulation (TMS)	NeuroImage	2012	N	Not MS
Froestl W., Muhs A., Pfeifer A.	Cognitive enhancers (nootropics). Part 2: Drugs interacting with enzymes	Journal of Alzheimer's Disease	2013	N	No TMS
Frye C.A., Paris J.J., Walf A.A., Rusconi J.C.	Effects and mechanisms of 3?,5?,-THP on emotion, motivation, and reward functions involving pregnane xenobiotic receptor	Frontiers in Neuroscience	2012	N	Not MS
Frye R.E., Rotenberg A., Ousley M., Pascual-Leone A.	Transcranial magnetic stimulation in child neurology: Current and future directions	Journal of Child Neurology	2008	N	Not adults
Fuhr P.	Clinical Neurophysiology in multiple sclerosis - From diagnostic tool to biomarker	Clinical Neurophysiology	2015	Y
Fullam T.	Upper motor neuron disorders: Primary lateral sclerosis, upper motor neuron dominant amyotrophic lateral sclerosis, and hereditary spastic paraplegia	Brain Sciences	2021	N	Not MS
Funk R.H.W., Fähnle M.	A short review on the influence of magnetic fields on neurological diseases	Frontiers in Bioscience - Scholar	2021	N	Not original research
Furman A.J., Thapa T., Summers S.J., Cavaleri R., Fogarty J.S., Steiner G.Z., Schabrun S.M., Seminowicz D.A.	Cerebral peak alpha frequency reflects average pain severity in a human model of sustained, musculoskeletal pain	Journal of Neurophysiology	2019	N	Not MS
Galazka M.	Central Action of Botulinum Toxin Type A – Is It Possible?	Neurophysiology	2015	N	Not MS
Gall C., Sgorzaly S., Schmidt S., Brandt S., Fedorov A., Sabel B.A.	Noninvasive transorbital alternating current stimulation improves subjective visual functioning and vision-related quality of life in optic neuropathy	Brain Stimulation	2011	N	Not MS
Gallagher S.	How the Body Shapes the Mind	How the Body Shapes the Mind	2006	N	Not MS
Gandelman-Marton R.	Posturography in MS patients treated with high dose methylprednisolone	Neurological Research	2016	N	No TMS
Gandevia S.C.	Spinal and supraspinal factors in human muscle fatigue	Physiological Reviews	2001	N	Not MS
Gandolfi M., Geroin C., Antonini A., Smania N., Tinazzi M.	Understanding and Treating Pain Syndromes in Parkinson's Disease	International Review of Neurobiology	2017	N	Not MS
Gandolfi M., Smania N., Vella A., Picelli A., Chirumbolo S.	Assessed and Emerging Biomarkers in Stroke and Training-Mediated Stroke Recovery: State of the Art	Neural Plasticity	2017	N	Not MS
Gao L., Zhang Y., Sterling K., Song W.	Brain-derived neurotrophic factor in Alzheimer’s disease and its pharmaceutical potential	Translational Neurodegeneration	2022	N	Not MS
Garaci F., Toschi N., Lanzafame S., Marfia G.A., Marziali S., Meschini A., Di Giuliano F., Simonetti G., Guerrisi M., Massa R., Floris R.	Brain MR diffusion tensor imaging in Kennedy's disease	Neuroradiology Journal	2015	N	Not MS
Garcia A.M., DeLeon J., Tee B.L.	Neurodegenerative disorders of speech and language: Non-language-dominant diseases	Encyclopedia of Behavioral Neuroscience: Second Edition	2021	N	Not MS
Garcia A.M., Hesse E., Birba A., Adolfi F., Mikulan E., Caro M.M., Petroni A., Bekinschtein T.A., Del Carmen Garcia M., Silva W., Ciraolo C., Vaucheret E., Sedeno L., Ibanez A.	Time to Face Language: Embodied Mechanisms Underpin the Inception of Face-Related Meanings in the Human Brain	Cerebral Cortex	2020	N	Not MS
Gehr S., Kaiser T., Kreutz R., Ludwig W.-D., Paul F.	Suggestions for improving the design of clinical trials in multiple sclerosis—results of a systematic analysis of completed phase III trials	EPMA Journal	2019	N	No TMS
George M.S., Short E.B., Kerns S., Li X., Hanlon C., Pelic C., Taylor J.J., Badran B.W., Borckardt J.J., Williams N., Fox J.	Repetitive transcranial magnetic stimulation for depression and other indications	Bioelectromagnetic and Subtle Energy Medicine	2014	N	Not MS
Gersztenkorn D., Lee A.G.	Palinopsia revamped: A systematic review of the literature	Survey of Ophthalmology	2015	N	Not MS
Ghasemzadeh H., Fallahzadeh R., Jafari R.	A hardware-Assisted energy-efficient processing model for activity recognition using Wearables	ACM Transactions on Design Automation of Electronic Systems	2016	N	Not MS
Gianni C.	Abnormal individual finger movement control in MS: A neurophysiological and neuroimaging study	Multiple Sclerosis Journal	2018	Y
Giaschi D.	The Processing of Motion-Defined Form	Seeing Spatial Form	2012	N	No TMS
Gillett G., Tomlinson A., Efthimiou O., Cipriani A.	Predicting treatment effects in unipolar depression: A meta-review	Pharmacology and Therapeutics	2020	N	No TMS
Goadsby P.J.	Can we develop neurally acting drugs for the treatment of migraine?	Nature Reviews Drug Discovery	2005	N	Not MS
Gobbi C., Rocca M.A., Pagani E., Riccitelli G.C., Pravatà E., Radaelli M., Martinelli-Boneschi F., Falini A., Copetti M., Comi G., Filippi M.	Forceps minor damage and co-occurrence of depression and fatigue in multiple sclerosis	Multiple Sclerosis Journal	2014	N	No TMS
Godeiro C., França C., Carra R.B., Saba F., Saba R., Maia D., Brandão P., Allam N., Rieder C.R.M., Freitas F.C., Capato T., Spitz M., De Faria D.D.D., Cordellini M., Veiga B.A.A.G., Rocha M.S.G., MacIel R., De Melo L.B., Möller P.D.S., Júnior M.R.R., Fornari L.H.T., Mantese C.E., Barbosa E.R., Munhoz R.P., Della Coletta M.V., Cury R.G., Neuromodulation for Movement Disorders Study Group Brazilian…	Use of non-invasive stimulation in movement disorders: A critical review [O uso da estimulação não-invasiva em distúrbios do movimento: Uma revisão crítica]	Arquivos de Neuro-Psiquiatria	2021	N	Not English
Gokden M.	Neuropathologic evaluation: From pathologic features to diagnosis	Neuropathologic Evaluation: From Pathologic Features to Diagnosis	2013	N	Not original research
Goldstein J.A.	Tuning the brain: Principles and practice of neurosomatic medicine	Tuning the Brain: Principles and Practice of Neurosomatic Medicine	2013	N	Not original research
Gomez-Tames J., Laakso I., Murakami T., Ugawa Y., Hirata A.	TMS activation site estimation using multiscale realistic head models	Journal of Neural Engineering	2020	N	Not MS
González-Zamorano Y., Fernández-Carnero J., Sánchez-Cuesta F.J., Arroyo-Ferrer A., Vourvopoulos A., Figueiredo P., Serrano J.I., Romero J.P.	New approaches based on non-invasive brain stimulation and mental representation techniques targeting pain in parkinson’s disease patients: Two study protocols for two randomized controlled trials	Brain Sciences	2021	N	Not MS
Gooijers J., Swinnen S.P.	Interactions between brain structure and behavior: The corpus callosum and bimanual coordination	Neuroscience and Biobehavioral Reviews	2014	N	Not MS
Govindan R.B., Raethjen J., Arning K., Kopper F., Deuschl G.	Time delay and partial coherence analyses to identify cortical connectivities	Biological Cybernetics	2006	N	Not MS
Gracies J.-M.	Pathophysiology of spastic paresis. I: Paresis and soft tissue changes	Muscle and Nerve	2005	N	Not MS
Grade M., Hernandez Tamames J.A., Pizzini F.B., Achten E., Golay X., Smits M.	A neuroradiologist’s guide to arterial spin labeling MRI in clinical practice	Neuroradiology	2015	N	No TMS
Grandori F., Ravazzani P.	Magnetic Stimulation of the Motor Cortex—Theoretical Considerations	IEEE Transactions on Biomedical Engineering	1991	N	Not MS
Grapperon, AM; Ridley, B; Verschueren, A; Maarouf, A; Confort-Gouny, S; Fortanier, E; Schad, L; Guye, M; Ranjeva, JP; Attarian, S; Zaaraoui, W	Quantitative Brain Sodium MRI Depicts Corticospinal Impairment in Amyotrophic Lateral Sclerosis	RADIOLOGY	2019	N	Not MS
Grégoire S., Michaud V., Chapuy E., Eschalier A., Ardid D.	Study of emotional and cognitive impairments in mononeuropathic rats: Effect of duloxetine and gabapentin	Pain	2012	N	Not humans
Grey M.J., Bouyer L., Nielsen J.B.	Neural control of walking	Routledge Handbook of Motor Control and Motor Learning	2013	N	Not MS
Grothe M.	Noninvasive electrophysiology	Neuromethods	2021	N	Not MS
Guerra A., Pogosyan A., Nowak M., Tan H., Ferreri F., Di Lazzaro V., Brown P.	Phase Dependency of the Human Primary Motor Cortex and Cholinergic Inhibition Cancelation during Beta tACS	Cerebral Cortex	2016	N	Not MS
Guerriero F, Ricevuti G.	Extremely low frequency electromagnetic fields stimulation modulates autoimmunity and immune responses: a possible immuno-modulatory therapeutic effect in neurodegenerative diseases	Neural Regen Res	2016	N	No TMS
Gueugneau, N; Bove, M; Ballay, Y; Papaxanthis, C	Interhemispheric inhibition is dynamically regulated during action observation	CORTEX	2016	N	Not MS
Gugino L.D., Aglio L.S., Potts G., Grimson W.E.L., Shenton M.E., Kikinis R., Alexander III E., Gonzalez A.A., Romero R., Ettinger G.J., Cote W.A., Leventon M.E., Black P.M.	Perioperative use of transcranial magnetic stimulation	Techniques in Neurosurgery	2001	N	Not MS
Gugino L.D., Romero R., Rameriz M., Richardson M.E., Aglio L.S.	TMS in the perioperative period	Oxford Handbook of Transcranial Stimulation	2012	N	Not MS
Güllmar D., Haueisen J., Reichenbach J.R.	Influence of anisotropic electrical conductivity in white matter tissue on the EEG/MEG forward and inverse solution. A high-resolution whole head simulation study	NeuroImage	2010	N	No TMS
Guo F., Zheng X., He Z., Zhang R., Zhang S., Wang M., Chen H., Wang W.	Nimodipine Promotes Functional Recovery After Spinal Cord Injury in Rats	Frontiers in Pharmacology	2021	N	Not humans
Guo P., Zhao P., Lv H., Su Y., Liu M., Chen Y., Wang Y., Hua H., Kang S.	Abnormal Regional Spontaneous Neural Activity in Nonarteritic Anterior Ischemic Optic Neuropathy: A Resting-State Functional MRI Study	Neural Plasticity	2020	N	Not humans
Gurel N.Z., Hadaya J., Ardell J.L.	Stress-related dysautonomias and neurocardiology-based treatment approaches	Autonomic Neuroscience: Basic and Clinical	2022	N	Not MS
Hallett M.	Transcranial Magnetic Stimulation: A Primer	Neuron	2007	N	Not original research
Halligan P.W., Wade D.T.	The Effectiveness of Rehabilitation for Cognitive Deficits	The Effectiveness of Rehabilitation for Cognitive Deficits	2012	N	Not MS
Hampel H., Toschi N., Babiloni C., Baldacci F., Black K.L., Bokde A.L.W., Bun R.S., Cacciola F., Cavedo E., Chiesa P.A., Colliot O., Coman C.-M., Dubois B., Duggento A., Durrleman S., Ferretti M.-T., George N., Genthon R., Habert M.-O., Herholz K., Koronyo Y., Koronyo-Hamaoui M., Lamari F., Langevin T., Lehéricy S., Lorenceau J., Neri C., Nisticò R., Nyasse-Messene F., Ritchie C., Rossi S., Santa…	Revolution of Alzheimer Precision Neurology. Passageway of Systems Biology and Neurophysiology	Journal of Alzheimer's Disease	2018	N	Not MS
Hardmeier M., Schindler C., Kuhle J., Fuhr P.	Validation of Quantitative Scores Derived From Motor Evoked Potentials in the Assessment of Primary Progressive Multiple Sclerosis: A Longitudinal Study	Frontiers in Neurology	2020	Y
Hardmeier, M; Fuhr, P	Multimodal Evoked Potentials as Candidate Prognostic and Response Biomarkers in Clinical Trials of Multiple Sclerosis	JOURNAL OF CLINICAL NEUROPHYSIOLOGY	2021	Y
Harrigan M.R., Deveikis J.P.	Handbook of Cerebrovascular Disease and Neurointerventional Technique: Second Edition	Handbook of Cerebrovascular Disease and Neurointerventional Technique: Second Edition	2013	N	Not MS
Harris-Love M.L., Perez M.A., Chen R., Cohen L.G.	Interhemispheric inhibition in distal and proximal arm representations in the primary motor cortex	Journal of Neurophysiology	2007	N	Not MS
Harro J., Oreland L.	Depression as a spreading adjustment disorder of monoaminergic neurons: A case for primary implication of the locus coeruleus	Brain Research Reviews	2001	N	Not MS
Hasey G.	Transcranial magnetic stimulation in the treatment of mood disorder: A review and comparison with electroconvulsive therapy	Canadian Journal of Psychiatry	2001	N	Not MS
Hashimoto R, Kanho M, Fujimoto K, Tanaka Y.	[Left hand clumsiness due to disturbance of kinesthesia after damage to the dorsal column of the high cervical cord]	Rinsho Shinkeigaku	1997	N	Not English
Hatzinger M., Hemmeter U., Hirsbrunner T., Holsboer-Trachsler E., Leyhe T., Mall J.-F., Mosimann U., Rach N., Trächsel N., Savaskan E.	Therapy recommendations for diagnosis and treatment of depression in old age [Empfehlungen für Diagnostik und Therapie der Depression im Alter]	Praxis	2018	N	Not English
Haug BA, Kukowski B.	Latency and duration of the muscle silent period following transcranial magnetic stimulation in multiple sclerosis, cerebral ischemia, and other upper motoneuron lesions	Neurology	1994	Y
Hayek D., Antonenko D., Witte A.V., Lehnerer S.M., Meinzer M., Külzow N., Prehn K., Rujescu D., Schneider A., Grittner U., Flöel A.	Impact of COMT val158met on tDCS-induced cognitive enhancement in older adults	Behavioural Brain Research	2021	N	No TMS
Hayes K.C., Potter P.J., Wolfe D.L., Hsieh J.T.C., Delaney G.A., Blight A.R.	4-Aminopyridine-Sensitive Neurologic Deficits in Patients with Spinal Cord Injury	Journal of Neurotrauma	1994	N	Not MS
Hayes K.C., Wolfe D.L.	Central conduction studies in patients with spinal cord injury and other forms of myelopathy	Journal of Electromyography and Kinesiology	1995	N	Not MS
Hedera P.	Emerging strategies in the management of essential tremor	Therapeutic Advances in Neurological Disorders	2017	N	Not MS
Hellewell S.C., Welton T., Pearce A.J., Maller J.J., Grieve S.M.	Diffusion MRI as a complementary assessment to cognition, emotion, and motor dysfunction after sports-related concussion: a systematic review and critical appraisal of the literature	Brain Imaging and Behavior	2021	N	Not MS
Henkin R.I.	Carbonic anhydrase I, II, and VI, blood plasma, erythrocyte and saliva zinc and copper increase after repetitive transcranial magnetic stimulation	American Journal of the Medical Sciences	2010	N	Not MS
Henry J.A., Roberts L.E., Caspary D.M., Theodoroff S.M., Salvi R.J.	Underlying mechanisms of tinnitus: Review and clinical implications	Journal of the American Academy of Audiology	2014	N	Not MS
Henry M., Baudry S.	Age-related changes in leg proprioception: Implications for postural control	Journal of Neurophysiology	2019	N	Not MS
Hernandez-Garcia L., Buschkuehl M.	Advances in longitudinal MRI diagnostic tests	Expert Opinion on Medical Diagnostics	2012	N	Not MS
Hill A.T., Rogasch N.C., Fitzgerald P.B., Hoy K.E.	Impact of concurrent task performance on transcranial direct current stimulation (tDCS)-Induced changes in cortical physiology and working memory	Cortex	2019	N	Not MS
Hirst R.J., McGovern D.P., Setti A., Shams L., Newell F.N.	What you see is what you hear: Twenty years of research using the Sound-Induced Flash Illusion	Neuroscience and Biobehavioral Reviews	2020	N	No TMS
Hoffmann M.	Clinical mentation evaluation: A connectomal approach to rapid and comprehensive assessment	Clinical Mentation Evaluation: A Connectomal Approach to Rapid and Comprehensive Assessment	2020	N	Not MS
Hoffmann M.	Cognitive, conative and behavioral neurology: An evolutionary perspective	Cognitive, Conative and Behavioral Neurology: An Evolutionary Perspective	2016	N	Not MS
Hofstadt-van Oy U.	Clinical isolated syndromes: Sensitivity to detect clinically silent lesions with the triple stimulation technique in comparison to transcranial magnetic stimulation and visual/somatosensory evoked potentials	Neurology	2013	Y
Hofstadt-Van Oy U.	Motor conduction, walking ability and cognitive function in patients with clinical isolated syndromes and remitting relapsing multiple sclerosis: A one year follow-up study after initiation of a disease modifying therapy	Multiple Sclerosis	2013	Y
Hofstadt-van Oy U.	Motor-conduction failure in clinical isolated syndromes: Sensitivity to detect clinically silent lesions with transcranial magnetic stimulation and the triple-stimulation technique	Klinische Neurophysiologie	2011	Y
Hofstadt-Van Oy U.	Triple stimulation in patients with clinical isolated syndromes. Sensitivity to detect clinically silent lesions in comparison to transcranial magnetic stimulation and visual/somatosensory evoked potentials	Journal of Neurology	2011	Y
Hofstadt-van Oy, U; Keune, PM; Muenssinger, J; Hagenburger, D; Oschmann, P	Normative data and long-term test-retest reliability of the triple stimulation technique (TST) in multiple sclerosis	CLINICAL NEUROPHYSIOLOGY	2015	Y
Hojat M.	Empathy in health professions education and patient care	Empathy in Health Professions Education and Patient Care	2016	N	Not MS
Holland P.R.	Headache and sleep: Shared pathophysiological mechanisms	Cephalalgia	2014	N	Not MS
Honeine J.-L., Schieppati M.	Time-interval for integration of stabilizing haptic and visual information in subjects balancing under static and dynamic conditions	Frontiers in Systems Neuroscience	2014	N	No TMS
Höppner J.	Demyelination and axonal degeneration in corpus callosum assessed by analysis of transcallosally mediated inhibition in multiple sclerosis	Clinical Neurophysiology	1999	Y
Hopwood V., Donnellan C.	Acupuncture in neurological conditions	Acupuncture in Neurological Conditions	2010	N	No TMS
Horvath A.A., Csernus E.A., Lality S., Kaminski R.M., Kamondi A.	Inhibiting Epileptiform Activity in Cognitive Disorders: Possibilities for a Novel Therapeutic Approach	Frontiers in Neuroscience	2020	N	Not MS
Horvath J.C., Forte J.D., Carter O.	Evidence that transcranial direct current stimulation (tDCS) generates little-to-no reliable neurophysiologic effect beyond MEP amplitude modulation in healthy human subjects: A systematic review	Neuropsychologia	2015	N	Not MS
Hosp J.A., Reisert M., von Kageneck C., Rijntjes M., Weiller C.	Approximation to pain-signaling network in humans by means of migraine	Human Brain Mapping	2021	N	Not MS
Houdayer E., Comi G., Leocani L.	The neurophysiologist perspective into MS plasticity	Frontiers in Neurology	2015	Y
Howard I.P., Rogers B.J.	Perceiving in Depth	Perceiving in Depth	2012	N	Not MS
Hsu M.-J., Chan H.-L., Huang Y.-Z., Lin J.-H., Hsu H.-H., Chang Y.-J.	Mechanism of Fatigue Induced by Different Cycling Paradigms With Equivalent Dosage	Frontiers in Physiology	2020	N	Not MS
Hupé J.-M., Dojat M.	A critical review of the neuroimaging literature on synesthesia	Frontiers in Human Neuroscience	2015	N	Not MS
Iarrobino I., Bongiardina A., Dal Monte O., Sarasso P., Ronga I., Neppi-Modona M., Actis-Grosso R., Salatino A., Ricci R.	Right and left inferior frontal opercula are involved in discriminating angry and sad facial expressions	Brain Stimulation	2021	N	Not MS
Ilmoniemi R.J., Ruohonen J., Karhu J.	Transcranial magnetic stimulation - A new tool for functional imaging of the brain	Critical Reviews in Biomedical Engineering	1999	N	Not MS
Innocenti G.M., Schmidt K., Milleret C., Fabri M., Knyazeva M.G., Battaglia-Mayer A., Aboitiz F., Ptito M., Caleo M., Marzi C.A., Barakovic M., Lepore F., Caminiti R.	The functional characterization of callosal connections	Progress in Neurobiology	2022	N	Not MS
Inomata-Terada S., Okabe S., Arai N., Hanajima R., Terao Y., Frubayashi T., Ugawa Y.	Effects of high frequency Electromagnetic Field (EMF) emitted by mobile phones on the human motor cortex	Bioelectromagnetics	2007	N	Not MS
Isley M.R., Balzer J.R., Pearlman R.C., Zhang X.-F.	Intraoperative motor evoked potentials	Neurodiagnostic Journal	2001	N	Not MS
Jääskeläinen S.K.	Clinical neurophysiology and quantitative sensory testing in the investigation of orofacial pain and sensory function	Journal of Orofacial Pain	2004	N	Not MS
Jacques C., Jonas J., Maillard L., Colnat-Coulbois S., Koessler L., Rossion B.	The inferior occipital gyrus is a major cortical source of the face-evoked N170: Evidence from simultaneous scalp and intracerebral human recordings	Human Brain Mapping	2019	N	Not MS
Jahanshahi M., Ridding M.C., Limousin P., Profice P., Fogel W., Dressler D., Fuller R., Brown R.G., Brown P., Rothwell J.C.	Rapid rate transcranial magnetic stimulation - A safety study	Electroencephalography and Clinical Neurophysiology - Electromyography and Motor Control	1997	N	Not MS
Jain K.K.	The handbook of neuroprotection	The Handbook of Neuroprotection	2011	N	Not MS
Jaswal R., Gohel S., Biswal B.B., Alvarez T.L.	Task-modulated coactivation of vergence neural substrates	Brain Connectivity	2014	N	Not MS
Jay G.W.	Chronic pain	Chronic Pain	2007	N	Not MS
Jay G.W., Barkin R.L.	Trigeminal neuralgia and persistent idiopathic facial pain (atypical facial pain)	Disease-a-Month	2022	N	Not MS
Jensen M.P., Day M.A., Miró J.	Neuromodulatory treatments for chronic pain: Efficacy and mechanisms	Nature Reviews Neurology	2014	N	Not MS
Jia W., Kamen Y., Pivonkova H., Káradóttir R.T.	Neuronal activity-dependent myelin repair after stroke	Neuroscience Letters	2019	N	Not MS
Jiang J., Zhao Y.-J., Hu X.-Y., Du M.-Y., Chen Z.-Q., Wu M., Li K.-M., Zhu H.-Y., Kumar P., Gong Q.-Y.	Microstructural brain abnormalities in medication-free patients with major depressive disorder: A systematic review and meta-analysis of diffusion tensor imaging	Journal of Psychiatry and Neuroscience	2017	N	Not MS
Jiao Y., Liu Y.-W., Chen W.-G., Liu J.	Neuroregeneration and functional recovery after stroke: Advancing neural stem cell therapy toward clinical application	Neural Regeneration Research	2021	N	Not MS
Jin H., Liang Z., Zhu Z., Yan S., Lin L., Aisikaer A., Yin J., Jiang Y., Tian X.	Aging of global motion perception is accompanied by the changes of resting-state functional activity in the middle temporal gyrus	Acta Psychologica Sinica	2020	N	Not MS
Johansen S.L., Robakis T.K., Williams K.E., Rasgon N.L.	Management of perinatal depression with non-drug interventions	BMJ (Online)	2019	N	Not MS
Jones H.G., Braithwaite F.A., Edwards L.M., Causby R.S., Conson M., Stanton T.R.	The effect of handedness on mental rotation of hands: a systematic review and meta-analysis	Psychological Research	2021	N	Not MS
Juckel G., Norra C., Herpertz S., Baghai T.C., Lieb M., Schäfer M.	Depressive disorders in internal and neurological diseases [Depressive störungen bei internistischen und neurologischen Erkrankungen: Ursachen, häufigkeit und therapie]	Nervenheilkunde	2013	N	Not English
Julkunen P., Kimiskidis V.K., Belardinelli P.	Bridging the gap: TMS-EEG from lab to clinic	Journal of Neuroscience Methods	2022	Y
Jung, P; Beyerle, A; Hurnpich, M; Neumann-Haefelin, T; Lanfermann, H; Ziemann, U	Ipsilateral silent period: A marker of callosal conduction abnormality in early relapsing-remitting multiple sclerosis?	JOURNAL OF THE NEUROLOGICAL SCIENCES	2006	Y
Jung, P; Ziemann, U	Differences of the ipsilateral silent period in small hand muscles	MUSCLE & NERVE	2006	N	Not MS
Jung, P; Ziemann, U	Transcranial magnetic stimulation in multiple sclerosis	KLINISCHE NEUROPHYSIOLOGIE	2005	Y
Jürgens T.P., Leone M.	Pearls and pitfalls: Neurostimulation in headache	Cephalalgia	2013	N	Not MS
Kakigi R., Inui K., Tamura Y.	Electrophysiological studies on human pain perception	Clinical Neurophysiology	2005	N	Not MS
Kalloch B., Bazin P.-L., Villringer A., Sehm B., Hlawitschka M.	A flexible workflow for simulating transcranial electric stimulation in healthy and lesioned brains	PLoS ONE	2020	N	Not MS
Kan, RLD; Xu, GXJ; Shu, KT; Lai, FHY; Kranz, G; Kranz, GS	Effects of non-invasive brain stimulation in multiple sclerosis: systematic review and meta-analysis	THERAPEUTIC ADVANCES IN CHRONIC DISEASE	2022	Y
Kapur N., Cole J., Manly T., Viskontas I., Ninteman A., Hasher L., Pascual-Leone A.	Positive clinical neuroscience: Explorations in positive neurology	Neuroscientist	2013	N	Not MS
Kapur N., Kopelman M.D.	Advanced brain imaging procedures and human memory disorder	British Medical Bulletin	2003	N	No TMS
Karunakaran K.D., Peng K., Berry D., Green S., Labadie R., Kussman B., Borsook D.	NIRS measures in pain and analgesia: Fundamentals, features, and function	Neuroscience and Biobehavioral Reviews	2021	N	No TMS
Kaufman D.M., Geyer H., Milstein M.J.	Kaufman's Clinical Neurology for Psychiatrists: Eighth Edition	Kaufman's Clinical Neurology for Psychiatrists: Eighth Edition	2016	N	Not MS
Keshavan M., Eack S.	Cognitive enhancement in schizophrenia and related disorders	Cognitive Enhancement in Schizophrenia and Related Disorders	2019	N	Not MS
Kikkert S., Pfyffer D., Verling M., Freund P., Wenderoth N.	Finger somatotopy is preserved after tetraplegia but deteriorates over time	eLife	2021	N	Not MS
Kim, HJ; Tetreault, LA; Massicotte, EM; Arnold, PM; Skelly, AC; Brodt, ED; Riew, KD	Differential Diagnosis for Cervical Spondylotic Myelopathy Literature Review	SPINE	2013	N	Not MS
Kimberley T.J., Borich M.R., Prochaska K.D., Mundfrom S.L., Perkins A.E., Poepping J.M.	Establishing the definition and inter-rater reliability of cortical silent period calculation in subjects with focal hand dystonia and healthy controls	Neuroscience Letters	2009	N	Not MS
Kimmey B.A., McCall N.M., Wooldridge L.M., Satterthwaite T.D., Corder G.	Engaging endogenous opioid circuits in pain affective processes	Journal of Neuroscience Research	2022	N	Not MS
King B.R., Rumpf J.-J., Heise K.-F., Veldman M.P., Peeters R., Doyon J., Classen J., Albouy G., Swinnen S.P.	Lateralized effects of post-learning transcranial direct current stimulation on motor memory consolidation in older adults: An fMRI investigation	NeuroImage	2020	N	Not MS
Kiylioglu N., Parlaz A.U., Akyildiz U.O., Tataroglu C.	Evoked potentials and disability in multiple sclerosis: A different perspective to a neglected method	Clinical Neurology and Neurosurgery	2015	Y
Klein M.M., Treister R., Raij T., Pascual-Leone A., Park L., Nurmikko T., Lenz F., Lefaucheur J.-P., Lang M., Hallett M., Fox M., Cudkowicz M., Costello A., Carr D.B., Ayache S.S., Oaklander A.L.	Transcranial magnetic stimulation of the brain: Guidelines for pain treatment research	Pain	2015	N	Not MS
Knikou M.	Neural control of locomotion and training-induced plasticity after spinal and cerebral lesions	Clinical Neurophysiology	2010	N	Not MS
Knikou M., Angeli C.A., Ferreira C.K., Harkema S.J.	Soleus H-reflex modulation during body weight support treadmill walking in spinal cord intact and injured subjects	Experimental Brain Research	2009	N	Not MS
Knox A.D.C., Goswami R., Anastakis D.J., Davis K.D.	Cortical Plasticity After Peripheral Nerve Injury	Nerves and Nerve Injuries	2015	N	Not MS
Kobayashi M., Pascual-Leone A.	Transcranial magnetic stimulation in neurology	Lancet Neurology	2003	N	Not MS
Koch G.	TMS investigations into the task-dependent functional interplay between human posterior parietal and motor cortex	Behavioural Brain Research	2009	N	Not MS
Kolbe R., Aytulun A., Müller A.-K., Ringelstein M., Aktas O., Schnitzler A., Hartung H.-P., Groiss S.J., Albrecht P.	Occipital repetitive transcranial magnetic stimulation does not affect multifocal visual evoked potentials	BMC Neuroscience	2020	N	Not MS
Komssi S., Aronen H.J., Huttunen J., Kesäniemi M., Soinne L., Nikouline V.V., Ollikainen M., Roine R.O., Karhu J., Savolainen S., Ilmoniemi R.J.	Ipsi- and contralateral EEG reactions to transcranial magnetic stimulation	Clinical Neurophysiology	2002	N	Not MS
Koo H., Kim M.S., Han S.W., Paulus W., Nitche M.A., Kim Y.-H., Kim H.-I., Ko S.-H., Shin Y.-I.	After-effects of anodal transcranial direct current stimulation on the excitability of the motor cortex in rats	Restorative Neurology and Neuroscience	2016	N	Not MS
Koob G.F., Le Moal M.	Neurobiology of Addiction	Neurobiology of Addiction	2006	N	Not MS
Kool V.K., Agrawal R.	Psychology of technology	Psychology of Technology	2016	N	Not MS
Koppi St., Conca A., Swoboda E., König P.	Transcranial Magnetic Stimulation in Depressive Disorder: A New Antidepressant Aproach? [Die transkranielle Magnetstimulation bei depressiven Patienten: Ein neues antidepressives Therapieprinzip? - Präsentation eines Pilotversuchs]	Wiener Medizinische Wochenschrift	1996	N	Not MS
Korai S.A., Ranieri F., Di Lazzaro V., Papa M., Cirillo G.	Neurobiological After-Effects of Low Intensity Transcranial Electric Stimulation of the Human Nervous System: From Basic Mechanisms to Metaplasticity	Frontiers in Neurology	2021	N	Not MS
Kordsachia C.C., Labuschagne I., Stout J.C.	Beyond emotion recognition deficits: A theory guided analysis of emotion processing in Huntington's disease	Neuroscience and Biobehavioral Reviews	2017	N	Not MS
Kosa P., Ghazali D., Tanigawa M., Barbour C., Cortese I., Kelley W., Snyder B., Ohayon J., Fenton K., Lehky T., Wu T., Greenwood M., Nair G., Bielekova B.	Development of a sensitive outcome for economical drug screening for progressive multiple sclerosis treatment	Frontiers in Neurology	2016	Y
Kostic, VS; Svetel, M; Dragasevic, N; Stefanova, E; Petrovic, I	Dystonia: Road to understanding movements	NEUROBIOLOGICAL STUDIES - FROM GENES TO BEHAVIOUR 2006	2006	N	Not MS
Koyama S., Tanabe S., Takeda K., Sakurai H., Kanada Y.	Modulation of spinal inhibitory reflexes depends on the frequency of transcutaneous electrical nerve stimulation in spastic stroke survivors	Somatosensory and Motor Research	2016	N	Not MS
Krarup C.	Physiology and function	Handbook of Clinical Neurophysiology	2006	N	Not MS
Krenn M.J., Vargas Luna J.L., Mayr W., Stokic D.S.	Bipolar transcutaneous spinal stimulation evokes short-latency reflex responses in human lower limbs alike standard unipolar electrode configuration	Journal of Neurophysiology	2020	N	Not MS
Krishnan V., Nestler E.J.	Animal models of depression: Molecular perspectives	Current Topics in Behavioral Neurosciences	2011	N	Not MS
Krivickas L.S., Carter G.T.	Adult motor neuron disease	DeLisa's Physical Medicine and Rehabilitation: Principles and Practice: Fifth Edition	2012	N	Not MS
Kubanek J., Shi J., Marsh J., Chen D., Deng C., Cui J.	Ultrasound modulates ion channel currents	Scientific Reports	2016	N	Not MS
Kumru H., Kofler M.	Effect of spinal cord injury and of intrathecal baclofen on brainstem reflexes	Clinical Neurophysiology	2012	N	Not MS
Küper M.	Motor rehabilitation of degenerative cerebellar disorders [Motorische Rehabilitation von degenerativen Kleinhirnerkrankungen]	Aktuelle Neurologie	2014	N	Not MS
Kuppuswamy A.	The Neurobiology of Pathological Fatigue: New Models, New Questions	Neuroscientist	2021	N	Not MS
Kure A.J., Savas H., Hijaz T.A., Hussaini S.F., Korutz A.W.	Advancements in Positron Emission Tomography/Magnetic Resonance Imaging and Applications to Diagnostic Challenges in Neuroradiology	Seminars in Ultrasound, CT and MRI	2021	N	Not MS
La Rocca G., Sabatino G., Menna G., Altieri R., Ius T., Marchese E., Olivi A., Barresi V., Della Pepa G.M.	5-Aminolevulinic Acid False Positives in Cerebral Neuro-Oncology: Not All That Fluorescent Is Tumor. A Case-Based Update and Literature Review	World Neurosurgery	2020	N	Not MS
Lai K.-L., Liao K.-K., Fuh J.-L., Wang S.-J.	Subcortical hyperexcitability in migraineurs: A high-frequency oscillation study	Canadian Journal of Neurological Sciences	2011	N	Not MS
Lambert G.A.	Looking in the wrong place? The search for an ideal migraine preventative	Drug Development Research	2007	N	Not MS
Lambert G.A., Hoskin K.L., Zagami A.S.	Cortico-NRM influences on trigeminal neuronal sensation	Cephalalgia	2008	N	Not MS
Lambert G.A., Zagami A.S.	The mode of action of migraine triggers: A hypothesis	Headache	2009	N	Not MS
Lambru G., Benemei S., Andreou A.P., Luciani M., Serafini G., van den Brink A.M., Martelletti P.	Position Paper on Post-Traumatic Headache: The Relationship Between Head Trauma, Stress Disorder, and Migraine	Pain and Therapy	2021	N	Not MS
Lappin M.S., Lawrie F.W., Richards T.L., Kramer E.D.	Effects of a pulsed electromagnetic therapy on multiple sclerosis fatigue and quality of life: A double-blind, placebo controlled trial	Alternative Therapies in Health and Medicine	2003	Y
Lascano, AM; Lalive, PH; Hardmeier, M; Fuhr, P; Seeck, M	Clinical evoked potentials in neurology: a review of techniques and indications	JOURNAL OF NEUROLOGY NEUROSURGERY AND PSYCHIATRY	2017	Y
Latash M.L.	Fifty years of physics of living systems	Advances in Experimental Medicine and Biology	2016	N	Not MS
Latash M.L.	Physics of Biological Action and Perception	Physics of Biological Action and Perception	2019	N	Not MS
Latash M.L.	Synergy	Synergy	2009	N	Not MS
Lee J., Hyun J.-W., Lee J., Choi E.-J., Shin H.-G., Min K., Nam Y., Kim H.J., Oh S.-H.	So You Want to Image Myelin Using MRI: An Overview and Practical Guide for Myelin Water Imaging	Journal of Magnetic Resonance Imaging	2021	N	Not MS
Leemhuis E.	Disconnected body representation: Neuroplasticity following spinal cord injury	Journal of Clinical Medicine	2019	N	Not MS
Lefaucheur J.-P.	A comprehensive database of published tDCS clinical trials (2005–2016) [Une base de données complète des études cliniques utilisant la tDCS (2005–2016)]	Neurophysiologie Clinique	2016	N	Not MS
Lefaucheur J.-P.	Clinical neurophysiology of pain	Handbook of Clinical Neurology	2019	N	Not MS
Lefaucheur J.-P.	Transcranial magnetic stimulation	Handbook of Clinical Neurology	2019	N	Not MS
Lefaucheur J.-P., Aleman A., Baeken C., Benninger D.H., Brunelin J., Di Lazzaro V., Filipovi? S.R., Grefkes C., Hasan A., Hummel F.C., Jääskeläinen S.K., Langguth B., Leocani L., Londero A., Nardone R., Nguyen J.-P., Nyffeler T., Oliveira-Maia A.J., Oliviero A., Padberg F., Palm U., Paulus W., Poulet E., Quartarone A., Rachid F., Rektorová I., Rossi S., Sahlsten H., Schecklmann M., Szekely D., Zi…	Evidence-based guidelines on the therapeutic use of repetitive transcranial magnetic stimulation (rTMS): An update (2014–2018)	Clinical Neurophysiology	2020	Y
Lefaucheur J.-P., Antal A., Ayache S.S., Benninger D.H., Brunelin J., Cogiamanian F., Cotelli M., De Ridder D., Ferrucci R., Langguth B., Marangolo P., Mylius V., Nitsche M.A., Padberg F., Palm U., Poulet E., Priori A., Rossi S., Schecklmann M., Vanneste S., Ziemann U., Garcia-Larrea L., Paulus W.	Evidence-based guidelines on the therapeutic use of transcranial direct current stimulation (tDCS)	Clinical Neurophysiology	2017	N	Not MS
Leff A., Starrfelt R.	Alexia: Diagnosis, Treatment and Theory	Alexia: Diagnosis, Treatment and Theory	2014	N	Not MS
Lehmann N., Taubert M.	Exercise- induced improvement in motor learning	The Exercise Effect on Mental Health: Neurobiological Mechanisms	2018	N	Not MS
Lei Y., Han H., Yuan F., Javeed A., Zhao Y.	The brain interstitial system: Anatomy, modeling, in vivo measurement, and applications	Progress in Neurobiology	2017	N	Not MS
Lema A., Carvalho S., Fregni F., Gonçalves Ó.F., Leite J.	The effects of direct current stimulation and random noise stimulation on attention networks	Scientific Reports	2021	N	Not MS
Lenz F.A., Casey K.L., Jones E.G., Willis W.D.	The human pain system: Experimental and clinical perspectives	The Human Pain System: Experimental and Clinical Perspectives	2010	N	Not MS
Leocani L.	Clinical neurophysiology of multiple sclerosis	Handbook of Clinical Neurology	2014	Y
Leocani L., Comi G.	Electrophysiological assessment in multiple sclerosis	Multiple Sclerosis: Recovery of Function and Neurorehabilitation	2010	Y
Leocani L., Rocca M.A., Comi G.	MRI and neurophysiological measures to predict course, disability and treatment response in multiple sclerosis	Current Opinion in Neurology	2016	Y
Leocani, L; Comi, G	Movement-related event-related desynchronization in neuropsychiatric disorders	EVENT-RELATED DYNAMICS OF BRAIN OSCILLATIONS	2006	N	Not MS
León Ruiz M, Sospedra M, Arce Arce S, Tejeiro-Martínez J, Benito-León J.	Current evidence on the potential therapeutic applications of transcranial magnetic stimulation in multiple sclerosis: A systematic review of the literature	Neurologia (Engl Ed)	2018	Y
Leon-Sarmiento, FE; Elfakhani, M; Boutros, NN	THE MOTOR EVOKED POTENTIAL IN AIDS AND HAM/TSP State of the evidence	ARQUIVOS DE NEURO-PSIQUIATRIA	2009	N	Not MS
Letzen J.E., Seminowicz D.A., Campbell C.M., Finan P.H.	Exploring the potential role of mesocorticolimbic circuitry in motivation for and adherence to chronic pain self-management interventions	Neuroscience and Biobehavioral Reviews	2019	N	Not MS
Leung A., Agarin T.	Allodynia: Symptoms, causes and treatment options	Horizons in Neuroscience Research	2015	N	Not MS
Lewis G.N., Rice D.A.	Chronic pain: We should not underestimate the contribution of neural plasticity	Critical Reviews in Physical and Rehabilitation Medicine	2014	N	Not MS
Li F., Huang X., Yang Y., Li B., Wu Q., Zhang T., Lui S., Kemp G.J., Gong Q.	Microstructural brain abnormalities in patients with obsessive-compulsive disorder: Diffusion-tensor MR imaging study at 3.0 T	Radiology	2011	N	Not MS
Li H., Flé G., Bhatt M., Qu Z., Ghazavi S., Yazdani L., Bosio G., Rafati I., Cloutier G.	Viscoelasticity Imaging of Biological Tissues and Single Cells Using Shear Wave Propagation	Frontiers in Physics	2021	N	No TMS
Li L.-S., Yu H., Raynald R., Wang X.-D., Dai G.-H., Cheng H.-B., Liu X.-B., An Y.-H.	Anatomical mechanism of spontaneous recovery in regions caudal to thoracic spinal cord injury lesions in rats	PeerJ	2017	N	Not humans
Li M., Yang L., Bai Y., Liu H.	Analytical methods in lipidomics and their applications	Analytical Chemistry	2014	N	Not MS
Li M.D.	Tobacco smoking addiction: Epidemiology, genetics, mechanisms, and treatment	Tobacco Smoking Addiction: Epidemiology, Genetics, Mechanisms, and Treatment	2018	N	Not MS
Liao Z., Yang X., Wang W., Deng W., Zhang Y., Song A., Ni B., Zhao H., Zhang S., Li Z.	hucMSCs transplantation promotes locomotor function recovery, reduces apoptosis and inhibits demyelination after SCI in rats	Neuropeptides	2021	N	Not MS
Lin D.J., Cramer S.C.	Principles of Neural Repair and Their Application to Stroke Recovery Trials	Seminars in Neurology	2021	N	Not MS
Lindberg P.G., Feydy A., Maier M.A.	White Matter Organization in Cervical Spinal Cord Relates Differently to Age and Control of Grip Force in Healthy Subjects	Journal of Neuroscience	2010	N	Not MS
Liou L.-M.	Diagnostic and predictive value of central motor conduction time (CMCT) for acute ischemic stroke patients	Clinical Neurophysiology	2018	N	Not MS
Liu F., Guo W., Yu D., Gao Q., Gao K., Xue Z., Du H., Zhang J., Tan C., Liu Z., Zhao J., Chen H.	Classification of different therapeutic responses of major depressive disorder with multivariate pattern analysis method based on structural MR scans	PLoS ONE	2012	N	Not MS
Liu J., Kou Z.F., Tian Y.Q.	Diffuse axonal injury after traumatic cerebral microbleeds: An evaluation of imaging techniques	Neural Regeneration Research	2014	N	Not MS
Liveson J.A., Ma D.M.	Laboratory Reference for Clinical Neurophysiology	Laboratory Reference for Clinical Neurophysiology	1999	N	Not MS
Lo, YL; Chan, LL; Lim, W; Tan, SB; Tan, CT; Chen, JLT; Fook-Chong, S; Ratnagopal, P	Systematic correlation of transcranial magnetic stimulation and magnetic resonance Imaging in cervical spondylotic myelopathy	SPINE	2004	N	Not MS
Lok H.C., Kwok J.B.	The role of white matter dysfunction and leukoencephalopathy/leukodystrophy genes in the aetiology of frontotemporal dementias: Implications for novel approaches to therapeutics	International Journal of Molecular Sciences	2021	N	Not MS
Lozeron P., Poujois A., Richard A., Masmoudi S., Meppiel E., Woimant F., Kubis N.	Contribution of TMS and rTMS in the understanding of the pathophysiology and in the treatment of dystonia	Frontiers in Neural Circuits	2016	N	Not MS
Lüscher B., Möhler H.	Brexanolone, a neurosteroid antidepressant, vindicates the gabaergic deficit hypothesis of depression and may foster resilience [version 1; peer review: 4 approved]	F1000Research	2019	N	Not MS
Macaulay T.R., Peters B.T., Wood S.J., Clément G.R., Oddsson L., Bloomberg J.J.	Developing Proprioceptive Countermeasures to Mitigate Postural and Locomotor Control Deficits After Long-Duration Spaceflight	Frontiers in Systems Neuroscience	2021	N	Not MS
Maccora S., Bolognini N., Cosentino G., Baschi R., Vallar G., Fierro B., Brighina F.	Multisensorial Perception in Chronic Migraine and the Role of Medication Overuse	Journal of Pain	2020	N	Not MS
Maddess T., Ho Y.-L., Wong S.S.Y., Kolic M., Goh X.-L., Carle C.F., James A.C.	Multifocal pupillographic perimetry with white and colored stimuli	Journal of Glaucoma	2011	N	Not MS
Madsen M.A.J.	Cortical lesions detected with 7T MRI are associated with disruption of local cortical function and area specific symptoms	Multiple Sclerosis Journal	2021	N	Not MS
Maeo S., Balshaw T.G., Lanza M.B., Hannah R., Folland J.P.	Corticospinal excitability and motor representation after long-term resistance training	European Journal of Neuroscience	2021	N	Not MS
Maertens De Noordhout A.	Cortical magnetic stimulation [Applications de la stimulation magnetique corticale]	Neurophysiologie Clinique	1998	N	Not MS
Magistris, MR; Rosler, KM; Truffert, A; Landis, T; Hess, CW	A clinical study of motor evoked potentials using a triple stimulation technique	BRAIN	1999	N	Not MS
Magnin E.	What Are the Minimal Detectable Changes in SDMT and Verbal Fluency Tests for Assessing Changes in Cognitive Performance in Persons with Multiple Sclerosis and Non-Multiple Sclerosis Controls?	European Neurology	2020	Y
Makarov S.N., Golestanirad L., Wartman W.A., Nguyen B.T., Noetscher G.M., Ahveninen J.P., Fujimoto K., Weise K., Nummenmaa A.R.	Boundary element fast multipole method for modeling electrical brain stimulation with voltage and current electrodes	Journal of Neural Engineering	2021	N	Not MS
Makarov S.N., Wartman W.A., Noetscher G.M., Fujimoto K., Zaidi T., Burnham E.H., Daneshzand M., Nummenmaa A.	Degree of improving TMS focality through a geometrically stable solution of an inverse TMS problem	NeuroImage	2021	N	Not MS
Malhi G.S., Bassett D., Boyce P., Bryant R., Fitzgerald P.B., Fritz K., Hopwood M., Lyndon B., Mulder R., Murray G., Porter R., Singh A.B.	Royal Australian and New Zealand College of Psychiatrists clinical practice guidelines for mood disorders	Australian and New Zealand Journal of Psychiatry	2015	N	Not MS
Malmivuo J., Plonsey R.	Bioelectromagnetism: Principles and Applications of Bioelectric and Biomagnetic Fields	Bioelectromagnetism: Principles and Applications of Bioelectric and Biomagnetic Fields	2012	N	Not MS
Mancini A., de Iure A., Picconi B.	Basic mechanisms of plasticity and learning	Handbook of Clinical Neurology	2022	N	Not MS
Mancini A., Ghiglieri V., Parnetti L., Calabresi P., Di Filippo M.	Neuro-Immune Cross-Talk in the Striatum: From Basal Ganglia Physiology to Circuit Dysfunction	Frontiers in Immunology	2021	Y
Manogaran P.	Assessing conductivity in the cortical-spinal pathway using motor evoked potentials in multiple sclerosis and neuromyelitis optica patients	Neurology	2013	Y
Manogaran P.	Corticospinal tract integrity measured using transcranial magnetic stimulation and magnetic resonance imaging in neuromyelitis optica and multiple sclerosis	Multiple Sclerosis	2016	Y
Manto M., Argyropoulos G.P.D., Bocci T., Celnik P.A., Corben L.A., Guidetti M., Koch G., Priori A., Rothwell J.C., Sadnicka A., Spampinato D., Ugawa Y., Wessel M.J., Ferrucci R.	Consensus Paper: Novel Directions and Next Steps of Non-invasive Brain Stimulation of the Cerebellum in Health and Disease	Cerebellum	2021	N	Not MS
Manto M.U.	Cerebellar disorders: A practical approach to diagnosis and management	Cerebellar Disorders: A Practical Approach to Diagnosis and Management	2010	N	Not MS
Mariani, LL; Corvol, JC	Maximizing placebo response in neurological clinical practice	PLACEBO EFFECTS IN NEUROLOGIC DISEASE	2020	N	Not MS
Marion S.	Effects of modified-release fampridine on upper limb impairment in patients with Multiple Sclerosis	Multiple Sclerosis and Related Disorders	2020	Y
Markowitsch H.J., Staniloiu A.	Memory, autonoetic consciousness, and the self	Consciousness and Cognition	2011	N	Not MS
Marsden, J; Harris, C	Cerebellar ataxia: pathophysiology and rehabilitation	CLINICAL REHABILITATION	2011	N	Not MS
Martin A.R., Tetreault L., Davies B.M., Curt A., Freund P., Rahimi-Movaghar V., Wilson J.R., Fehlings M.G., Kwon B.K., Harrop J.S., Davies B.M., Kotter M.R.N., Guest J.D., Aarabi B., Kurpad S.N.	Imaging and Electrophysiology for Degenerative Cervical Myelopathy [AO Spine RECODE DCM Research Priority Number 9]	Global Spine Journal	2021	N	Not MS
Martín H., Del Río M.S., De Silanes C.L., Álvarez-Linera J., Hernández J.A., Pareja J.A.	Photoreactivity of the occipital cortex measured by functional magnetic resonance imaging-blood oxygenation level dependent in migraine patients and healthy volunteers: Pathophysiological implications	Headache	2011	N	Not MS
Martin L.J., Koren S.A., Persinger M.A.	Influence of a complex magnetic field application in rats upon thermal nociceptive thresholds: The importance of polarity and timing	International Journal of Neuroscience	2004	N	Not MS
Marufa S.A., Hsieh T.-H., Liou J.-C., Chen H.-Y., Peng C.-W.	Neuromodulatory effects of repetitive transcranial magnetic stimulation on neural plasticity and motor functions in rats with an incomplete spinal cord injury: A preliminary study	PLoS ONE	2021	N	Not MS
Masri R., Keller A.	Chronic Pain Following Spinal Cord Injury	Advances in Experimental Medicine and Biology	2012	N	Not MS
Mastropasqua A., Dowsett J., Dieterich M., Taylor P.C.J.	Right frontal eye field has perceptual and oculomotor functions during optokinetic stimulation and nystagmus	Journal of Neurophysiology	2020	N	Not MS
Mathis, J; Hess, CW	Motor-evoked potentials from multiple target muscles in multiple sclerosis and cervical myelopathy	EUROPEAN JOURNAL OF NEUROLOGY	1996	Y
Matsuya R., Ushiyama J., Ushiba J.	Prolonged reaction time during episodes of elevated ?-band corticomuscular coupling and associated oscillatory muscle activity	Journal of Applied Physiology	2013	N	Not MS
Matthews P.M.	An introduction to functional magnetic resonance imaging of the brain	Functional Magnetic Resonance Imaging: An Introduction to Methods	2012	N	Not MS
Matthews P.M.	Functional Brain Reorganization and Recovery After Injury to White Matter	Multiple Sclerosis as A Neuronal Disease	2005	N	Not MS
Matthews P.M., Johansen-Berg H., Reddy H.	Non-invasive mapping of brain functions and brain recovery: Applying lessons from cognitive neuroscience to neurorehabilitation	Restorative Neurology and Neuroscience	2004	N	Not MS
Maurits N.	From neurology to methodology and back: An introduction to clinical neuroengineering	From Neurology to Methodology and Back: An Introduction to Clinical Neuroengineering	2012	N	Not MS
Maxner C.E., Moeller J.J.	Visual disturbances and migraine	Current Neurology and Neuroscience Reports	2005	N	Not MS
Mayer M.	Neurophysiological and kinesiological aspects of spastic gait: The need for a functional approach	Functional Neurology	2002	N	Not MS
McCandless D.W.	Epilepsy: Animal and human correlations	Epilepsy: Animal and Human Correlations	2014	N	Not MS
McCann H., Pisano G., Beltrachini L.	Variation in Reported Human Head Tissue Electrical Conductivity Values	Brain Topography	2019	N	Not MS
McCombe P.A., Gordon T.P., Jackson M.W.	Bladder dysfunction in multiple sclerosis	Expert Review of Neurotherapeutics	2009	N	No TMS
McDonald W.M., Greenberg B.D.	Electroconvulsive therapy in the treatment of neuropsychiatric conditions and transcranial magnetic stimulation as a pathophysiological probe in neuropsychiatry	Depression and Anxiety	2000	N	Not MS
McGilchrist I.	Divine understanding and the divided brain	Handbook of Neuroethics	2015	N	Not MS
McGilchrist I.	God, metaphor, and the language of the hemispheres	Religion, Language, and the Human Mind	2018	N	Not MS
McMackin R., Muthuraman M., Groppa S., Babiloni C., Taylor J.-P., Kiernan M.C., Nasseroleslami B., Hardiman O.	Measuring network disruption in neurodegenerative diseases: New approaches using signal analysis	Journal of Neurology, Neurosurgery and Psychiatry	2019	N	Not MS
McMorris T., Tomporowski P.D., Audiffren M.	Exercise and Cognitive Function	Exercise and Cognitive Function	2009	N	Not MS
Meek B.P., Hill S., Modirrousta M.	Accelerated repetitive transcranial magnetic stimulation in the treatment of post-concussion symptoms due to mild traumatic brain injury: a pilot study	Brain Injury	2021	N	Not MS
Meesen R.L., Cuypers K., Rothwell J.C., Swinnen S.P., Levin O.	The effect of long-term TENS on persistent neuroplastic changes in the human cerebral cortex	Human Brain Mapping	2011	N	Not MS
Menezes Costa L.d.C., Maher C.G., McAuley J.H., Costa L.O.P.	Systematic review of cross-cultural adaptations of McGill Pain Questionnaire reveals a paucity of clinimetric testing	Journal of Clinical Epidemiology	2009	N	Not MS
Menon P, Kiernan MC, Vucic S.	Cortical dysfunction underlies the development of the split-hand in amyotrophic lateral sclerosis	PLoS One	2014	N	Not MS
Meskers C.G.M., De Groot J.H., De Vlugt E., Schouten A.C.	Neurocontrol of movement: System identification approach for clinical benefit	Frontiers in Integrative Neuroscience	2015	N	Not MS
Metcalfe A.B., Lawes N.	A modern interpretation of the Rood Approach	Physical Therapy Reviews	1998	N	Not MS
Meyer L., Obleser J., Anwander A., Friederici A.D.	Linking ordering in Broca's area to storage in left temporo-parietal regions: The case of sentence processing	NeuroImage	2012	N	Not MS
Michel C.M., Koenig T.	EEG microstates as a tool for studying the temporal dynamics of whole-brain neuronal networks: A review	NeuroImage	2018	N	No TMS
Michou E., Hamdy S.	Neurostimulation as an Approach to Dysphagia Rehabilitation: Current Evidence	Current Physical Medicine and Rehabilitation Reports	2013	N	Not MS
Mignarri, A; Rossi, S; Ballerini, M; Gallus, GN; Del Puppo, M; Galluzzi, P; Federico, A; Dotti, MT	Clinical relevance and neurophysiological correlates of spasticity in cerebrotendinous xanthomatosis	JOURNAL OF NEUROLOGY	2011	N	Not MS
Milosevic M., Nakanishi T., Sasaki A., Yamaguchi A., Nomura T., Popovic M.R., Nakazawa K.	Cortical Re-organization After Traumatic Brain Injury Elicited Using Functional Electrical Stimulation Therapy: A Case Report	Frontiers in Neuroscience	2021	N	Not MS
Minutillo A., Panza G., Mauri M.C.	Musical practice and BDNF plasma levels as a potential marker of synaptic plasticity: an instrument of rehabilitative processes	Neurological Sciences	2021	N	Not MS
Miscio G, Guastamacchia G, Priano L, Baudo S, Mauro A.	Are the neurophysiological techniques useful for the diagnosis of diaphragmatic impairment in multiple sclerosis (MS)?	Clin Neurophysiol	2003	Y
Miscio, G; Pisano, F; Mora, G; Mazzini, L	Motor neuron disease: usefulness of transcranial magnetic stimulation in improving the diagnosis	CLINICAL NEUROPHYSIOLOGY	1999	N	Not MS
Miterko L.N., Baker K.B., Beckinghausen J., Bradnam L.V., Cheng M.Y., Cooperrider J., DeLong M.R., Gornati S.V., Hallett M., Heck D.H., Hoebeek F.E., Kouzani A.Z., Kuo S.-H., Louis E.D., Machado A., Manto M., McCambridge A.B., Nitsche M.A., Taib N.O.B., Popa T., Tanaka M., Timmann D., Steinberg G.K., Wang E.H., Wichmann T., Xie T., Sillitoe R.V.	Consensus Paper: Experimental Neurostimulation of the Cerebellum	Cerebellum	2019	N	Not MS
Miyaguchi S., Kojima S., Kirimoto H., Tamaki H., Onishi H.	Do differences in levels, types, and duration of muscle contraction have an effect on the degree of post-exercise depression?	Frontiers in Human Neuroscience	2016	N	Not MS
Mochizuki H., Yosipovitch G.	Central representation of itch	Pruritus: Second Edition	2016	N	Not MS
Møller A.R.	Neural plasticity and disorders of the nervous system	Neural Plasticity and Disorders of the Nervous System	2006	N	Not MS
Møller A.R.	The malleable brain: Benefits and harm from plasticity of the brain	The Malleable Brain: Benefits and Harm from Plasticity of the Brain	2009	N	Not MS
Momosaki R., Yamada N., Ota E., Abo M.	Repetitive peripheral magnetic stimulation for activities of daily living and functional ability in people after stroke	Cochrane Database of Systematic Reviews	2017	N	Not MS
Monfils M.-H., Plautz E.J., Kleim J.A.	In search of the motor engram: Motor map plasticity as a mechanism for encoding motor experience	Neuroscientist	2005	N	Not MS
Montagni E., Resta F., Mascaro A.L.A., Pavone F.S.	Optogenetics in brain research: From a strategy to investigate physiological function to a therapeutic tool	Photonics	2019	N	Not MS
Moreva E., Bernardi E., Pugliese V., Traina P., Sosso A., Ditalia Tchernij S., Forneris J., Picollo F., Petrini G., Pastuovic Z., Degiovanni I.P., Olivero P., Genovese M.	High sensitivity nitrogen-vacancy-assisted magnetic/electric field sensing at INRIM	24th IMEKO TC4 International Symposium and 22nd International Workshop on ADC and DAC Modelling and Testing	2020	N	Not MS
Mori F, Nisticò R, Mandolesi G, Piccinin S, Mango D, Kusayanagi H, Berretta N, Bergami A, Gentile A, Musella A, Nicoletti CG, Nicoletti F, Buttari F, Mercuri NB, Martino G, Furlan R, Centonze D.	Interleukin-1? promotes long-term potentiation in patients with multiple sclerosis	Neuromolecular Med	2014	Y
Mori F.	Cortical plasticity predicts recovery from relapse in multiple sclerosis	Multiple Sclerosis Journal	2014	Y
Morris G., Berk M., Puri B.K.	A Comparison of Neuroimaging Abnormalities in Multiple Sclerosis, Major Depression and Chronic Fatigue Syndrome (Myalgic Encephalomyelitis): is There a Common Cause?	Molecular Neurobiology	2018	Y
Morya E., Monte-Silva K., Bikson M., Esmaeilpour Z., Biazoli C.E., Jr., Fonseca A., Bocci T., Farzan F., Chatterjee R., Hausdorff J.M., Da Silva Machado D.G., Brunoni A.R., Mezger E., Moscaleski L.A., Pegado R., Sato J.R., Caetano M.S., Sá K.N., Tanaka C., Li L.M., Baptista A.F., Okano A.H.	Beyond the target area: an integrative view of tDCS-induced motor cortex modulation in patients and athletes	Journal of NeuroEngineering and Rehabilitation	2019	N	Not MS
Moskowitz S., Russ D.W., Clark L.A., Wages N.P., Grooms D.R., Woods A.J., Suhr J., Simon J.E., O’Shea A., Criss C.R., Fadda P., Clark B.C.	Is impaired dopaminergic function associated with mobility capacity in older adults?	GeroScience	2021	N	Not MS
Mostafa R.M., Mostafa Y.M., Ennaceur A.	Effects of exposure to extremely low-frequency magnetic field of 2 G intensity on memory and corticosterone level in rats	Physiology and Behavior	2002	N	Not MS
Moussavi Z., Suleiman A., Rutherford G., Ranjbar Pouya O., Dastgheib Z., Zhang W., Salter J., Wang X., Mansouri B., Lithgow B.	A Pilot Randomised Double-Blind Study of the Tolerability and efficacy of repetitive Transcranial Magnetic Stimulation on Persistent Post-Concussion Syndrome	Scientific Reports	2019	N	Not MS
Moustafa A.A.	Cognitive, clinical, and neural aspects of drug addiction	Cognitive, Clinical, and Neural Aspects of Drug Addiction	2020	N	Not MS
Muñoz-Ruata J., Martínez-Pérez L., Caro-Martínez E., Borja-Tomé M.	Frontal dysfunction in intellectual disability	Frontal Lobe: Anatomy, Functions and Injuries	2013	N	Not MS
Murillo N., Valls-Sole J., Vidal J., Opisso E., Medina J., Kumru H.	Focal vibration in neurorehabilitation	European Journal of Physical and Rehabilitation Medicine	2014	N	Not MS
Murray M.M., Spierer L.	Auditory spatio-temporal brain dynamics and their consequences for multisensory interactions in humans	Hearing Research	2009	N	Not MS
Murray N.M.F.	Motor Evoked Potentials	Electrodiagnosis in Clinical Neurology	2005	N	Not MS
Murray, D; Stoessl, AJ	Mechanisms and therapeutic implications of the placebo effect in neurological and psychiatric conditions	PHARMACOLOGY & THERAPEUTICS	2013	N	Not MS
Muzyka I.M., Estephan B.	Somatosensory evoked potentials	Handbook of Clinical Neurology	2019	N	Not MS
Nagasaka K., Nemoto K., Takashima I., Bando D., Matsuda K., Higo N.	Structural Plastic Changes of Cortical Gray Matter Revealed by Voxel-Based Morphometry and Histological Analyses in a Monkey Model of Central Post-Stroke Pain	Cerebral Cortex	2021	N	Not MS
Nantes J.C.	Intracortical inhibition in multiple sclerosis: Relation to clinical subtype, motor disability, and cortical damage	Multiple Sclerosis	2015	Y
Nantes J.C., Proulx S., Zhong J., Holmes S.A., Narayanan S., Brown R.A., Hoge R.D., Koski L.	GABA and glutamate levels correlate with MTR and clinical disability: Insights from multiple sclerosis	NeuroImage	2017	Y
Nantes J.C., Zhong J., Holmes S.A., Whatley B., Narayanan S., Lapierre Y., Arnold D.L., Koski L.	Intracortical inhibition abnormality during the remission phase of multiple sclerosis is related to upper limb dexterity and lesions	Clinical Neurophysiology	2016	Y
Nardone R.	Central motor conduction studies in patients with spinal cord disorders: A review	Spinal Cord	2014	N	Not MS
Nardone R., Höller Y., Brigo F., Frey V.N., Lochner P., Leis S., Golaszewski S., Trinka E.	The contribution of neurophysiology in the diagnosis and management of cervical spondylotic myelopathy: A review	Spinal Cord	2016	N	Not MS
Naro A., Bramanti A., Leo A., Manuli A., Sciarrone F., Russo M., Bramanti P., Calabrò R.S.	Effects of cerebellar transcranial alternating current stimulation on motor cortex excitability and motor function	Brain Structure and Function	2017	N	Not MS
Naser Moghadasi A.	Neural implant for the treatment of multiple sclerosis	Med Hypotheses	2020	Y
Naseri Kouzehgarani G., Feldsien T., Engelhard H.H., Mirakhur K.K., Phipps C., Nimmrich V., Clausznitzer D., Lefebvre D.R.	Harnessing cerebrospinal fluid circulation for drug delivery to brain tissues	Advanced Drug Delivery Reviews	2021	N	Not MS
Nasios G., Messinis L., Dardiotis E., Papathanasopoulos P.	Repetitive Transcranial Magnetic Stimulation, Cognition, and Multiple Sclerosis: An Overview	Behavioural Neurology	2018	Y
Navarrete F., García-Gutiérrez M.S., Jurado-Barba R., Rubio G., Gasparyan A., Austrich-Olivares A., Manzanares J.	Endocannabinoid System Components as Potential Biomarkers in Psychiatry	Frontiers in Psychiatry	2020	N	Not MS
Neige C., Rannaud Monany D., Lebon F.	Exploring cortico-cortical interactions during action preparation by means of dual-coil transcranial magnetic stimulation: A systematic review	Neuroscience and Biobehavioral Reviews	2021	N	Not MS
Neva J.L., Lakhani B., Brown K.E., Wadden K.P., Mang C.S., Ledwell N.H.M., Borich M.R., Vavasour I.M., Laule C., Traboulsee A.L., MacKay A.L., Boyd L.A.	Multiple measures of corticospinal excitability are associated with clinical features of multiple sclerosis	Behavioural Brain Research	2016	Y
Nezu A.	Transcranial magnetic stimulation in an adrenoleukodystrophy patient	Brain and Development	1996	N	Not MS
Nguyen-Thanh T., Reisert M., Anastasopoulos C., Hamzei F., Reithmeier T., Vry M.S., Kiselev V.G., Weyerbrock A., Mader I.	Global tracking in human gliomas: A comparison with established tracking methods	Clinical Neuroradiology	2013	N	Not MS
Nicoletti C.G.	Treatment with dimethyl fumarate enhances cholinergic transmission in multiple sclerosis	Multiple Sclerosis Journal	2018	Y
Nielsen J.F.	Standardization of facilitation of compound muscle action potentials using a modified myometer during magnetic stimulation in healthy volunteers	Electroencephalography and Clinical Neurophysiology/ Evoked Potentials	1994	N	Not MS
Nitsche M.A., Paulus W.	Transcranial direct current stimulation - Update 2011	Restorative Neurology and Neuroscience	2011	N	Not MS
Nollet, H; Van Ham, L; Deprez, P; Vanderstraeten, G	Transcranial magnetic stimulation: review of the technique, basic principles and applications	VETERINARY JOURNAL	2003	N	Not MS
Nordli D.R., Jr., Riviello J.J., Jr., Niedermeyer E.	Seizures and epilepsy in infants to adolescents	Niedermeyer's Electroencephalography: Basic Principles, Clinical Applications, and Related Fields: Sixth Edition	2012	N	Not MS
Notturno F., Capasso M., Delauretis A., Carpo M., Uncini A.	Glial fibrillary acidic protein as a marker of axonal damage in chronic neuropathies	Muscle and Nerve	2009	N	Not MS
Nové-Josserand A., André-Obadia N., Mauguière F.	Cervical spondylotic myelopathy: Motor and somatosensory evoked potentials, clinical and radiological correlations [Myélopathie cervicarthrosique: Intérêt des explorations électrophysiologiques et correlations avec les données radiologiques]	Revue Neurologique	2002	N	Not English
Nowak D.A.	Diagnostic relevance of transcranial magnetic and electric stimulation of the facial nerve in the management of facial palsy	Clinical Neurophysiology	2005	N	Not MS
Nuruki A., Tsujimura S.-I., Furuichi H., Takenaka T., Yunokuchi K.	Application of pulsed magnetic stimulation for recovery from muscle fatigue in hypokalemic and normal Wistar rats	Transactions of Japanese Society for Medical and Biological Engineering	2009	N	Not MS
Nuwer M.R.	Evoked potentials	Handbook of Multiple Sclerosis, Fourth Edition	2006	Y
Nuzzo J.L., Taylor J.L., Gandevia S.C.	CORP: Measurement of upper and lower limb muscle strength and voluntary activation	Journal of Applied Physiology	2018	N	Not MS
O'Connell N.E., Cossar J., Marston L., Wand B.M., Bunce D., De Souza L.H., Maskill D.W., Sharp A., Moseley G.L.	Transcranial direct current stimulation of the motor cortex in the treatment of chronic nonspecific low back pain: A randomized, double-blind exploratory study	Clinical Journal of Pain	2013	N	Not MS
Oertel F.C., Zimmermann H.G., Brandt A.U., Paul F.	Novel uses of retinal imaging with optical coherence tomography in multiple sclerosis	Expert Review of Neurotherapeutics	2019	Y
Olney, NT; Bischof, A; Rosen, H; Caverzasi, E; Stern, WA; Lomen-Hoerth, C; Miller, BL; Henry, RG; Papinutto, N	Measurement of spinal cord atrophy using phase sensitive inversion recovery (PSIR) imaging in motor neuron disease	PLOS ONE	2018	N	Not MS
Ommaya A.K., Adams K.M., Allman R.M., Collins E.G., Cooper R.A., Dixon C.E., Fishman P.S., Henry J.A., Kardon R., Kerns R.D., Kupersmith J., Lo A., Macko R., McArdle R., McGlinchey R.E., McNeil M.R., O'Toole T.P., Peckham P.H., Tuszynski M.H., Waxman S.G., Wittenberg G.F.	Opportunities in rehabilitation research	Journal of Rehabilitation Research and Development	2013	N	Not MS
Ong W.-Y., Stohler C.S., Herr D.R.	Role of the Prefrontal Cortex in Pain Processing	Molecular Neurobiology	2019	N	Not MS
Osborn A.G., Digre K.B.	Imaging in Neurology	Imaging in Neurology	2016	N	Not MS
Otte C., Gold S.M., Penninx B.W., Pariante C.M., Etkin A., Fava M., Mohr D.C., Schatzberg A.F.	Major depressive disorder	Nature Reviews Disease Primers	2016	N	Not MS
Pace T.W.W., Raison C.L., Miller A.H.	Implications of inflammation for neuropsychiatric disease: Contributions and consequences	Inflammation, Lifestyle and Chronic Diseases: The Silent Link	2016	N	Not MS
Pacheco-Barrios K., Cardenas-Rojas A., Thibaut A., Costa B., Ferreira I., Caumo W., Fregni F.	Methods and strategies of tDCS for the treatment of pain: current status and future directions	Expert Review of Medical Devices	2020	N	Not MS
Palagi E., Celeghin A., Tamietto M., Winkielman P., Norscia I.	The neuroethology of spontaneous mimicry and emotional contagion in human and non-human animals	Neuroscience and Biobehavioral Reviews	2020	N	Not MS
Pall M.L.	Electromagnetic fields act via activation of voltage-gated calcium channels to produce beneficial or adverse effects	Journal of Cellular and Molecular Medicine	2013	N	Not MS
Pallix-Guyot, M; Guennoc, AM; Blasco, H; de Toffol, B; Corcia, P; Praline, J	Predictive value of motor evoked potentials in clinically isolated syndrome	ACTA NEUROLOGICA SCANDINAVICA	2011	Y
Panksepp J.	The long-term psychobiological consequences of infant emotions: Prescriptions for the twenty-first century	Neuropsychoanalysis	2001	N	Not MS
Papakostas G.I., Fava M.	Pharmacotherapy for depression and treatment-resistant depression	Pharmacotherapy for Depression and Treatment-Resistant Depression	2010	N	Not MS
Paraskevoudi N., Pezaris J.S.	Eye movement compensation and spatial updating in visual prosthetics: Mechanisms, limitations and future directions	Frontiers in Systems Neuroscience	2019	N	Not MS
Parmar V.K.	Supraspinal stimulation for treatment of refractory pain	Clinical Neurology and Neurosurgery	2014	N	Not MS
Parul, Mishra A., Singh S., Singh S., Tiwari V., Chaturvedi S., Wahajuddin M., Palit G., Shukla S.	Chronic unpredictable stress negatively regulates hippocampal neurogenesis and promote anxious depression-like behavior via upregulating apoptosis and inflammatory signals in adult rats	Brain Research Bulletin	2021	N	Not MS
Pateraki G., Anargyros K., Aloizou A.-M., Siokas V., Bakirtzis C., Liampas I., Tsouris Z., Ziogka P., Sgantzos M., Folia V., Peristeri E., Dardiotis E.	Therapeutic application of rTMS in neurodegenerative and movement disorders: A review	Journal of Electromyography and Kinesiology	2022	N	Not MS
Pavlou M., Bronstein A.M., Davies R.A.	Randomized trial of supervised versus unsupervised optokinetic exercise in persons with peripheral vestibular disorders	Neurorehabilitation and Neural Repair	2013	N	Not MS
Payne S.J.	Cerebral blood flow and metabolism: A quantitative approach	Cerebral Blood Flow and Metabolism: A Quantitative Approach	2017	N	Not MS
Pellegrini M., Zoghi M., Jaberzadeh S.	Can genetic polymorphisms predict response variability to anodal transcranial direct current stimulation of the primary motor cortex?	European Journal of Neuroscience	2021	N	Not MS
Pellegrini M., Zoghi M., Jaberzadeh S.	Genetic Polymorphisms Do Not Predict Interindividual Variability to Cathodal Transcranial Direct Current Stimulation of the Primary Motor Cortex	Brain Connectivity	2021	N	Not MS
Pelletier S.J., Cicchetti F.	Cellular and molecular mechanisms of action of transcranial direct current stimulation: Evidence from in vitro and in vivo models	International Journal of Neuropsychopharmacology	2015	N	Not MS
Peña-Ortega F.	Brain arrhythmias induced by amyloid beta and inflammation: Involvement in alzheimer’s disease and other inflammation-related pathologies	Current Alzheimer Research	2019	N	Not MS
Pereira S.R., Tello Velasquez J., Duggan S., Ivanisevic B., McKenna J.P., McCreary C., Downer E.J.	Recent advances in the understanding of the aetiology and therapeutic strategies in burning mouth syndrome: Focus on the actions of cannabinoids	European Journal of Neuroscience	2020	N	Not MS
Pérez-Fernández C., Sánchez-Kuhn A., Cánovas R., Flores P., Sánchez-Santed F.	The effect of transcranial direct current stimulation (tDCS) over human motor function	Lecture Notes in Computer Science (including subseries Lecture Notes in Artificial Intelligence and Lecture Notes in Bioinformatics)	2016	N	Not MS
Perfil electrofisiologico en la polineuropatia cronica desmielinizante inflamatoria	Electrophysiological characteristics of chronic inflammatory demyelinating polyneuropathy	Revista de Neurologia (1999) 28:4 (353-357). Date of Publication: 28 Feb 1999	1999	N	Not MS
Pervin Z., Stephen J.M.	Effect of Alcohol on the Central Nervous System to Develop Neurological Disorder: Pathophysiological and Lifestyle Modulation can be Potential Therapeutic Options for Alcohol-Induced Neurotoxication	AIMS Neuroscience	2021	N	Not MS
Petersen, TH; Rosenberg, K; Petersen, NC; Nielsen, JB	Cortical involvement in anticipatory postural reactions in man	EXPERIMENTAL BRAIN RESEARCH	2009	N	Not MS
Petrosyan H., Liang L., Tesfa A., Sisto S.A., Fahmy M., Arvanian V.L.	Modulation of H-reflex responses and frequency-dependent depression by repetitive spinal electromagnetic stimulation: From rats to humans and back to chronic spinal cord injured rats	European Journal of Neuroscience	2020	N	Not MS
Phan K.H., Anderson J.G., Bohay D.R.	Complications Associated with Peripheral Nerve Blocks	Orthopedic Clinics of North America	2021	N	Not MS
Pierrot-Deseilligny E., Burke D.	The circuitry of the human spinal cord: Its role in motor control and movement disorders	The Circuitry of the Human Spinal Cord: Its Role in Motor Control and Movement Disorders	2005	N	Not MS
Pierrot-Deseilligny E., Burke D.	The circuitry of the human spinal cord: Spinal and corticospinal mechanisms of movement	The Circuitry of the Human Spinal Cord: Spinal and Corticospinal Mechanisms of Movement	2012	N	Not MS
Pievani M., Pini L., Ferrari C., Pizzini F.B., Boscolo Galazzo I., Cobelli C., Cotelli M., Manenti R., Frisoni G.B.	Coordinate-Based Meta-Analysis of the Default Mode and Salience Network for Target Identification in Non-Invasive Brain Stimulation of Alzheimer's Disease and Behavioral Variant Frontotemporal Dementia Networks	Journal of Alzheimer's Disease	2017	N	Not MS
Pinault D.	A neurophysiological perspective on a preventive treatment against schizophrenia using transcranial electric stimulation of the corticothalamic pathway	Brain Sciences	2017	N	Not MS
Pisa M.	Dexterity impairment in progressive MS is related to intracortical motor conduction slowing	Multiple Sclerosis Journal	2019	Y
Pisa M.	Intracortical motor conduction is associated with hand dexterity in progressive multiple sclerosis	Multiple Sclerosis Journal	2021	Y
Playford D.	Outcome measurement in neurological disease	Current Opinion in Neurology	2008	N	Not MS
Plecash A.R.	Aquatherapy for neurodegenerative disorders	Journal of Huntington's Disease	2014	N	Not MS
Pollock A., Farmer S.E., Brady M.C., Langhorne P., Mead G.E., Mehrholz J., van Wijck F.	Interventions for improving upper limb function after stroke	Cochrane Database of Systematic Reviews	2014	N	Not MS
Potok W., van der Groen O., Bächinger M., Edwards D., Wenderoth N.	Transcranial random noise stimulation modulates neural processing of sensory and motor circuits – from potential cellular mechanisms to behaviour: A scoping review	eNeuro	2021	N	Not MS
Potter P.J., Hayes K.C., Hsieh J.T.C., Delaney G.A., Segal J.L.	Sustained improvements in neurological function in spinal cord injured patients treated with oral 4-aminopyridine: Three cases	Spinal Cord	1998	N	Not MS
Potter-Baker K.A.	A picture is worth a 1000 words: The potential of defining incompleteness of injury with neuroimaging and brain neurophysiology	Journal of Spinal Cord Medicine	2016	N	Not MS
Pourzitaki C., Dardalas I., Poutoglidou F., Kouvelas D., Kimiskidis V.K.	The combination of rtms and pharmacotherapy on in vitro models: A mini-review	CNS and Neurological Disorders - Drug Targets	2020	N	Not MS
Poynter W.D.	Pupil-size asymmetry is a physiologic trait related to gender, attentional function, and personality	Laterality	2017	N	Not MS
Premji A., Ziluk A., Nelson A.J.	Bilateral somatosensory evoked potentials following intermittent theta-burst repetitive transcranial magnetic stimulation	BMC Neuroscience	2010	N	Not MS
Prinz C., Starke L., Millward J.M., Fillmer A., Delgado P.R., Waiczies H., Pohlmann A., Rothe M., Nazaré M., Paul F., Niendorf T., Waiczies S.	In vivo detection of teriflunomide-derived fluorine signal during neuroinflammation using fluorine MR spectroscopy	Theranostics	2021	N	Not MS
Prior M.J.W.	NMR in living systems	Nuclear Magnetic Resonance	2021	N	No TMS
Qiao J., Hayes K.C., Hsieh J.T.C., Potter P.J., Delaney G.A.	Effects of 4-aminopyridine on motor evoked potentials in patients with spinal cord injury	Journal of Neurotrauma	1997	N	Not MS
Qin Z., Liang H.-B., Li M., Hu Y., Wu J., Qiao Y., Liu J.-R., Du X.	Disrupted White Matter Functional Connectivity With the Cerebral Cortex in Migraine Patients	Frontiers in Neuroscience	2022	N	Not MS
Quartarone A.	Brain plasticity and mechanisms of neural encoding of skills	Clinical Neurophysiology	2011	N	Not MS
Radetz A.	Dissecting task-specific plasticity capacity in patients with multiple sclerosis with transcranial magnetic stimulation	Clinical Neurophysiology	2020	Y
Radetz A.	Linking Microstructural Integrity and Motor Cortex Excitability in Multiple Sclerosis	Frontiers in Immunology	2021	Y
Radvansky G.A.	Human memory: Fourth edition	Human Memory	2021	N	Not MS
Rae C.L., Hughes L.E., Anderson M.C., Rowe J.B.	The prefrontal cortex achieves inhibitory control by facilitating subcortical motor pathway connectivity	Journal of Neuroscience	2015	N	Not MS
Ráez A., Oliveras I., Río-Álamos C., Díaz-Morán S., Cañete T., Blázquez G., Tobeña A., Fernández-Teruel A.	A missing link between depression models: Forced swimming test, helplessness and passive coping in genetically heterogeneous NIH-HS rats	Behavioural Processes	2020	N	Not MS
Raghavendra U., Acharya U.R., Adeli H.	Artificial Intelligence Techniques for Automated Diagnosis of Neurological Disorders	European Neurology	2020	N	Not MS
Ratliff J., Ortega R.A., Ooi H.Y., Mirallave A., Glickman A., Yu Q., Raymond D., Bressman S., Pullman S., Saunders-Pullman R.	Digitized spiral analysis may be a potential biomarker for brachial dystonia	Parkinsonism and Related Disorders	2018	N	Not MS
Restivo D.A.	Pharyngeal electrical stimulation device for the treatment of neurogenic dysphagia: Technology update	Medical Devices: Evidence and Research	2018	N	Not MS
Ribary U., Mackay A.L., Rauscher A., Tipper C.M., Giaschi D.E., Woodward T.S., Sossi V., Doesburg S.M., Ward L.M., Herdman A., Hamarneh G., Booth B.G., Moiseev A.	Emerging neuroimaging technologies: Toward future personalized diagnostics, prognosis, targeted intervention, and ethical challenges	Neuroethics: Anticipating the Future	2017	N	Not MS
Ribolsi M., Koch G., Magni V., Di Lorenzo G., Rubino I.A., Siracusano A., Centonze D.	Abnormal brain lateralization and connectivity in schizophrenia	Reviews in the Neurosciences	2009	N	Not MS
Rico, A; Audoin, B; Franques, J; Eusebio, A; Reuter, F; Malikova, I; Cherif, AA; Pouget, J; Pelletier, J; Attarian, S	Motor evoked potentials in clinically isolated syndrome suggestive of multiple sclerosis	MULTIPLE SCLEROSIS JOURNAL	2009	Y
Riquelme I., Padrón I., Cifre I., González-Roldán A.M., Montoya P.	Differences in somatosensory processing due to dominant hemispheric motor impairment in cerebral palsy	BMC Neuroscience	2014	N	Not MS
Robinson M.J., Edwards S.E., Iyengar S., Bymaster F., Clark M., Katon W.	Depression and pain	Frontiers in Bioscience	2009	N	Not MS
Rohde, V; Mayfrank, L; Weinzierl, M; Krings, T; Gilsbach, JM	Focused high frequency repetitive transcranial magnetic stimulation for localisation of the unexposed primary motor cortex during brain tumour surgery	JOURNAL OF NEUROLOGY NEUROSURGERY AND PSYCHIATRY	2003	N	Not MS
Rokach A.	The psychological journey to and from loneliness : Development, causes, and effects of social and emotional isolation	The Psychological Journey To and From Loneliness: Development, Causes, and Effects of Social and Emotional Isolation	2019	N	Not MS
Röricht S.	Responses of single motor units in relaxed hand muscles following magnetic motor cortex stimulation in patients with multiple sclerosis	EEG-EMG Zeitschrift fur Elektroenzephalographie Elektromyographie und Verwandte Gebiete (1997) 28:3 (130-135). Date of Publication: 1997	1997	Y
Rosen Y., Lenkinski R.E.	Recent Advances in Magnetic Resonance Neurospectroscopy	Neurotherapeutics	2007	N	No TMS
Rosenblat J.D., Kurdyak P., Cosci F., Berk M., Maes M., Brunoni A.R., Li M., Rodin G., McIntyre R.S., Carvalho A.F.	Depression in the medically ill	Australian and New Zealand Journal of Psychiatry	2020	N	Not MS
Rösler K.M., Magistris M.R., Glocker F.X., Kohler A., Deuschl G., Hess C.W.	Electrophysiological characteristics of lesions in facial palsies of different etiologies. A study using electrical and magnetic stimulation techniques	Electroencephalography and Clinical Neurophysiology/ Electromyography	1995	N	Not MS
Rosler, KM; Magistris, MR	The triple stimulation technique	KLINISCHE NEUROPHYSIOLOGIE	2005	Y	Not MS
Ross B.D.	High-field MRS in clinical drug development	Expert Opinion on Drug Discovery	2013	N	Not MS
Ross C.L., Harrison B.S.	The use of magnetic field for the reduction of inflammation: A review of the history and therapeutic results	Alternative Therapies in Health and Medicine	2013	Y
Rossi S, Mancino R, Bergami A, Mori F, Castelli M, De Chiara V, Studer V, Mataluni G, Sancesario G, Parisi V, Kusayanagi H, Bernardi G, Nucci C, Bernardini S, Martino G, Furlan R, Centonze D.	Potential role of IL-13 in neuroprotection and cortical excitability regulation in multiple sclerosis	Mult Scler	2011	Y
Rossi S., Hallett M., Rossini P.M., Pascual-Leone A., Avanzini G., Bestmann S., Berardelli A., Brewer C., Canli T., Cantello R., Chen R., Classen J., Demitrack M., Di Lazzaro V., Epstein C.M., George M.S., Fregni F., Ilmoniemi R., Jalinous R., Karp B., Lefaucheur J.-P., Lisanby S., Meunier S., Miniussi C., Miranda P., Padberg F., Paulus W., Peterchev A., Porteri C., Provost M., Quartarone A., Rot…	Safety, ethical considerations, and application guidelines for the use of transcranial magnetic stimulation in clinical practice and research	Clinical Neurophysiology	2009	Y
Rossi S., Pasqualetti P., Tecchio F., Sabato A., Rossini P.M.	Modulation of corticospinal output to human hand muscles following deprivation of sensory feedback	NeuroImage	1998	N	Not MS
Rossi, S; Studer, V; Moscatelli, A; Motta, C; Coghe, G; Fenu, G; Caillier, S; Buttari, F; Mori, F; Barbieri, F; Castelli, M; De Chiara, V; Monteleone, F; Mancino, R; Bernardi, G; Baranzini, SE; Marrosu, MG; Oksenberg, JR; Centonze, D	Opposite Roles of NMDA Receptors in Relapsing and Primary Progressive Multiple Sclerosis	PLOS ONE	2013	Y
Rossini P.M., Burke D., Chen R., Cohen L.G., Daskalakis Z., Di Iorio R., Di Lazzaro V., Ferreri F., Fitzgerald P.B., George M.S., Hallett M., Lefaucheur J.P., Langguth B., Matsumoto H., Miniussi C., Nitsche M.A., Pascual-Leone A., Paulus W., Rossi S., Rothwell J.C., Siebner H.R., Ugawa Y., Walsh V., Ziemann U.	Non-invasive electrical and magnetic stimulation of the brain, spinal cord, roots and peripheral nerves: Basic principles and procedures for routine clinical and research application: An updated report from an I.F.C.N. Committee	Clinical Neurophysiology	2015	Y
Rotem A., Moses E.	Magnetic stimulation of one-dimensional neuronal cultures	Biophysical Journal	2008	N	Not MS
Rothwell J., Antal A., Burke D., Carlsen A., Georgiev D., Jahanshahi M., Sternad D., Valls-Solé J., Ziemann U.	Central nervous system physiology	Clinical Neurophysiology	2021	N	Not MS
Rudroff T., Workman C.D.	Transcranial direct current stimulation as a treatment tool for mild traumatic brain injury	Brain Sciences	2021	N	Not MS
Runge V.M., Aoki S., Bradley W.G., Jr., Chang K.-H., Essig M., Ma L., Ross J.S., Valavanis A.	Magnetic resonance imaging and computed tomography of the brain - 50 years of innovation, with a focus on the future	Investigative Radiology	2015	N	No TMS
Russo M, Naro A, Leo A, Sessa E, D'Aleo G, Bramanti P, Calabrò RS.	Evaluating Sativex® in Neuropathic Pain Management: A Clinical and Neurophysiological Assessment in Multiple Sclerosis	Pain Med	2016	Y
Russo, M; Calabro, RS; Naro, A; Sessa, E; Rifici, C; D'Aleo, G; Leo, A; De Luca, R; Quartarone, A; Bramanti, P	Sativex in the Management of Multiple Sclerosis-Related Spasticity: Role of the Corticospinal Modulation	NEURAL PLASTICITY	2015	Y
Sabel B.A., Flammer J., Merabet L.B.	Residual vision activation and the brain-eye-vascular triad: Dysregulation, plasticity and restoration in low vision and blindness-a review	Restorative Neurology and Neuroscience	2018	N	Not MS
Sabel B.A., Matzke S., Prilloff S.	Special issues in brain plasticity, repair and rehabilitation: 20 years of a publishing strategy	Restorative Neurology and Neuroscience	2010	N	Not MS
Sahota P, Prabhakar S, Lal V, Khurana D, Das CP, Singh P.	Transcranial magnetic stimulation: role in the evaluation of disability in multiple sclerosis	Neurol India	2005	Y
Sahu R., Upadhayay S., Mehan S.	Inhibition of extracellular regulated kinase (ERK)-1/2 signaling pathway in the prevention of ALS: Target inhibitors and influences on neurological dysfunctions	European Journal of Cell Biology	2021	N	Not MS
Sakrajai P., Janyacharoen T., Jensen M.P., Sawanyawisuth K., Auvichayapat N., Tunkamnerdthai O., Keeratitanont K., Auvichayapat P.	Pain reduction in myofascial pain syndrome by anodal transcranial direct current stimulation combined with standard treatment a randomized controlled study	Clinical Journal of Pain	2014	N	Not MS
Samuel M., Colchester A.	Structural and functional magnetic resonance imaging in neurodegenerative diseases	Neurodegenerative Diseases: Neurobiology, Pathogenesis and Therapeutics	2005	N	Not MS
Sánchez-Kuhn A., Pérez-Fernández C., Cánovas R., Flores P., Sánchez-Santed F.	Transcranial direct current stimulation as a motor neurorehabilitation tool: An empirical review	BioMedical Engineering Online	2017	N	Not MS
Sand T., Vingen J.V.	Visual, long-latency auditory and brainstem auditory evoked potentials in migraine: Relation to pattern size, stimulus intensity, sound and light discomfort thresholds and pre-attack state	Cephalalgia	2000	N	Not MS
Sandroff B.M.	Systematic Review on Exercise Training as a Neuroplasticity-Inducing Behavior in Multiple Sclerosis	Neurorehabilitation and Neural Repair	2020	Y
San-Juan D., Morales-Quezada L., Orozco Garduño A.J., Alonso-Vanegas M., González-Aragón M.F., López D.A.E., Vázquez Gregorio R., Anschel D.J., Fregni F.	Transcranial direct current stimulation in epilepsy	Brain Stimulation	2015	N	Not MS
Santamaría A.J., Benavides F.D., Difede D.L., Khan A., Pujol M.V., Dietrich W.D., Marttos A., Green B.A., Hare J.M., Guest J.D.	Clinical and neurophysiological changes after targeted intrathecal injections of bone marrow stem cells in a C3 tetraplegic subject	Journal of Neurotrauma	2019	N	No TMS
Santos Ferreira I., Teixeira Costa B., Lima Ramos C., Lucena P., Thibaut A., Fregni F.	Searching for the optimal tDCS target for motor rehabilitation	Journal of NeuroEngineering and Rehabilitation	2019	N	No TMS
Sasaki R., Otsuru N., Miyaguchi S., Kojima S., Watanabe H., Ohno K., Sakurai N., Kodama N., Sato D., Onishi H.	Influence of brain-derived neurotrophic factor genotype on short-latency afferent inhibition and motor cortex metabolites	Brain Sciences	2021	N	Not MS
Scangos K.W., Weiner R.D., Coffey E.C., Krystal A.D.	An electrophysiological biomarker that may predict treatment response to ECT	Journal of ECT	2019	N	Not MS
Schecklmann M., Nejati V., Poeppl T.B., Peytard J., Rupprecht R., Wetter T.C., Langguth B., Kreuzer P.M.	Bifrontal high-frequency transcranial random noise stimulation is not effective as an add-on treatment in depression	Journal of Psychiatric Research	2021	N	Not MS
Schedlowski M., Enck P., Rief W., Bingel U.	Neuro-bio-behavioral mechanisms of placebo and nocebo responses: Implications for clinical trials and clinical practice	Pharmacological Reviews	2015	N	Not MS
Schimek N., Burke-Conte Z., Abernethy J., Schimek M., Burke-Conte C., Bobola M., Stocco A., Mourad P.D.	Repeated Application of Transcranial Diagnostic Ultrasound Towards the Visual Cortex Induced Illusory Visual Percepts in Healthy Participants	Frontiers in Human Neuroscience	2020	N	Not MS
Schlaeger R, Hardmeier M, Fuhr P.	Superficial brain stimulation in multiple sclerosis	Handb Clin Neurol	2013	Y
Schmahmann J.D., Guell X., Stoodley C.J., Halko M.A.	The Theory and Neuroscience of Cerebellar Cognition	Annual Review of Neuroscience	2019	N	Not original research
Schmidt H.D., Duman R.S.	Peripheral BDNF produces antidepressant-like effects in cellular and behavioral models	Neuropsychopharmacology	2010	N	Not MS
Schmierer K.	Conduction deficits of callosal fibres in early multiple sclerosis	Journal of Neurology Neurosurgery and Psychiatry	2000	Y
Schmierer, K; Roricht, S; Niehaus, L; Meyer, BU	Impaired transcallosal inhibition: an early indicator of central conduction deficits in multiple sclerosis	9TH EUROPEAN CONGRESS OF CLINICAL NEUROPHYSIOLOGY	1998	Y
Schuckit M.A.	Drug and alcohol abuse: A clinical guide to diagnosis and treatment: Sixth edition	Drug and Alcohol Abuse: A Clinical Guide to Diagnosis and Treatment: Sixth Edition	2006	N	Not MS
Schweizer S., Satpute A.B., Atzil S., Field A.P., Hitchcock C., Black M., Barrett L.F., Dalgleish T.	The impact of affective information on working memory: A pair of meta-analytic reviews of behavioral and neuroimaging evidence	Psychological Bulletin	2019	N	Not MS
Segrave R.A., Cooper N.R., Thomson R.H., Croft R.J., Sheppard D.M., Fitzgerald P.B.	Individualized alpha activity and frontal asymmetry in major depression	Clinical EEG and Neuroscience	2011	N	Not MS
Sellebjerg F.	Methylprednisolone treatment, immune activation, and intrathecal inflammation in multiple sclerosis	Danish Medical Bulletin	2004	Y
Serafini G.	Neuroprogression as an illness trajectory in bipolar disorder: A selective review of the current literature	Brain Sciences	2021	N	Not MS
Shehata H.	Effects of high frequency repetitive transcranial magnetic stimulation on gait and balance in patients with relapsing remitting multiple sclerosis	Multiple Sclerosis Journal	2017	Y
Sheldon R., Kiff E.S., Clarke A., Harris M.L., Hamdy S.	Sacral nerve stimulation reduces corticoanal excitability in patients with faecal incontinence	British Journal of Surgery	2005	N	Not MS
Shibata K., Yamane K., Iwata M., Ohkawa S.	Evaluating the effects of spatial frequency on migraines by using pattern-reversal visual evoked potentials	Clinical Neurophysiology	2005	N	Not MS
Shimizu T.	Repetitive transcranial magnetic stimulation accuracy as a spinal cord stimulation outcome predictor in patients with neuropathic pain	Journal of Clinical Neuroscience	2018	N	Not MS
Shimoji K., Willis W.D.	Evoked spinal cord potentials: An illustrated guide to physiology, pharmacology, and recording techniques	Evoked Spinal Cord Potentials: An Illustrated Guide to Physiology, Pharmacology, and Recording Techniques	2006	N	Not MS
Shinohara Y., Yanagihara T., Abe K., Yoshimine T., Fujinaka T., Chuma T., Ochi F., Nagayama M., Ogawa A., Suzuki N., Katayama Y., Kimura A., Lui M., Eto F.	VII. Rehabilitation	Journal of Stroke and Cerebrovascular Diseases	2011	N	Not MS
Shinozaki M., Nagoshi N., Nakamura M., Okano H.	Mechanisms of stem cell therapy in spinal cord injuries	Cells	2021	N	Not MS
Shoaib Z., Kamran M.A., Mannan M.M.N., Jeong M.Y.	Methodologies on the enhanced spatial resolution of non-invasive optical brain imaging: A review	IEEE Access	2019	N	Not MS
Shobe E.R.	Independent and collaborative contributions of the cerebral hemispheres to emotional processing	Frontiers in Human Neuroscience	2014	N	Not MS
Shorvon S.	Handbook of Epilepsy Treatment, Third Edition	Handbook of Epilepsy Treatment, Third Edition	2011	N	Not MS
Shumway-Cook A., Woollacott M.H.	Motor control: Translating research into clinical practice: Fourth edition	Motor Control: Translating Research into Clinical Practice: Fourth Edition	2014	N	Not MS
Sierra M.	Depersonalization: A new look at a neglected syndrome	Depersonalization: A New Look at a Neglected Syndrome	2009	N	Not MS
Simone I.L., Tortelli R., Samarelli V., D'Errico E., Sardaro M., Difruscolo O., Calabrese R., Francesco V.D.V., Livrea P., de Tommaso M.	Laser evoked potentials in amyotrophic lateral sclerosis	Journal of the Neurological Sciences	2010	N	Not MS
Simpson M.	The Effects of modified-release fampridine on upper limb impairment in multiple sclerosis	Multiple Sclerosis	2016	Y
Simpson M.	The fampridine upper limb study: Baseline clinical and electrophysiological data	Clinical Neurophysiology	2016	Y
Simpson M., Macdonell R.	The use of transcranial magnetic stimulation in diagnosis, prognostication and treatment evaluation in multiple sclerosis	Multiple Sclerosis and Related Disorders	2015	Y
Singer H., Mink J., Gilbert D., Jankovic J.	Movement Disorders in Childhood	Movement Disorders in Childhood	2010	N	Not original research
Smith H.S.	Evaluation tools in fatigue	Handbook of Fatigue in Health and Disease	2011	N	Not original research
Snow N.J., Wadden K.P., Chaves A.R., Ploughman M.	Transcranial Magnetic Stimulation as a Potential Biomarker in Multiple Sclerosis: A Systematic Review with Recommendations for Future Research	Neural Plasticity	2019	Y
Sohn Y.H., Hallett M.	Surround inhibition in human motor system	Experimental Brain Research	2004	N	Not MS
Solís-Vivanco R., Rodríguez-Violante M., Cervantes-Arriaga A., Justo-Guillén E., Ricardo-Garcell J.	Brain oscillations reveal impaired novelty detection from early stages of Parkinson's disease	NeuroImage: Clinical	2018	N	Not MS
Sollmann N., Trepte-Freisleder F., Albers L., Jung N.H., Mall V., Meyer B., Heinen F., Krieg S.M., Landgraf M.N.	Magnetic stimulation of the upper trapezius muscles in patients with migraine – A pilot study	European Journal of Paediatric Neurology	2016	N	Not MS
Sontheimer H.	Diseases of the Nervous System	Diseases of the Nervous System	2015	N	Not MS
Sozzi S., Nardone A., Schieppati M.	Calibration of the leg muscle responses elicited by predictable perturbations of stance and the effect of vision	Frontiers in Human Neuroscience	2016	N	Not MS
Stampanoni Bassi M, Buttari F, Gilio L, De Paolis N, Fresegna D, Centonze D, Iezzi E.	Inflammation and Corticospinal Functioning in Multiple Sclerosis: A TMS Perspective	Front Neurol	2020	Y
Stampanoni Bassi M, Buttari F, Nicoletti CG, Mori F, Gilio L, Simonelli I, De Paolis N, Marfia GA, Furlan R, Finardi A, Centonze D, Iezzi E.	Interleukin-1? Alters Hebbian Synaptic Plasticity in Multiple Sclerosis	Int J Mol Sci	2020	Y
Stampanoni Bassi M, Mori F, Buttari F, Marfia GA, Sancesario A, Centonze D, Iezzi E.	Neurophysiology of synaptic functioning in multiple sclerosis	Clin Neurophysiol	2017	Y
Stampanoni Bassi M.	Age at Disease Onset Associates With Oxidative Stress, Neuroinflammation, and Impaired Synaptic Plasticity in Relapsing-Remitting Multiple Sclerosis	Frontiers in Aging Neuroscience	2021	Y
Stampanoni Bassi M.	Can pharmacological manipulation of LTP favor the effects of motor rehabilitation in multiple sclerosis?	Multiple Sclerosis Journal	2018	Y
Stamponi Bassi M., Iezzi E., Pavone L., Mandolesi G., Musella A., Gentile A., Gilio L., Centonze D., Buttari F.	Modeling resilience to damage in multiple sclerosis: Plasticity meets connectivity	International Journal of Molecular Sciences	2020	Y
Stamponi Bassi, M; Gilio, L; Buttari, F; Maffei, P; Marfia, GA; Restivo, DA; Centonze, D; Lezzi, E	Remodeling Functional Connectivity in Multiple Sclerosis: A Challenging Therapeutic Approach	FRONTIERS IN NEUROSCIENCE	2017	Y
Stasheff S.F., Barton J.J.S.	Deficits in cortical visual function	Ophthalmology Clinics of North America	2001	N	Not MS
Sternberg Z., Schaller B.	Central Noradrenergic Agonists in the Treatment of Ischemic Stroke—an Overview	Translational Stroke Research	2020	N	Not MS
Stetkarova I.	Mechanisms of spasticity and its assessment [Mechanizmy spasticity a její hodnocení]	Ceska a Slovenska Neurologie a Neurochirurgie	2013	N	Not English
Steve V.	Cortical dysfunction in progressive forms of multiple sclerosisdeveloping a biomarker of disease severity	Journal of Clinical Neuroscience	2009	Y
Stigsby, B; Bohlega, S; McLean, DR; Al-Kawi, MZ	Transcranial magnetic stimulation in Behcet's disease: a cross-sectional and longitudinal study with 44 patients comparing clinical, neuroradiological, somatosensory and brain-stem auditory evoked potential findings	CLINICAL NEUROPHYSIOLOGY	2000	N	Not MS
Stirling J., Elliott R.	Introducing neuropsychology: Second edition	Introducing Neuropsychology: Second Edition	2008	N	Not MS
Straube A., Mayer M., Eggert T., Ditterich J.	Evidence for cortical coding of saccade velocity in memory-guided saccades in patients with CADASIL	Neuro-Ophthalmology	2000	N	Not MS
Stroman P.W., Coe B.C., Munoz D.P.	Influence of attention focus on neural activity in the human spinal cord during thermal sensory stimulation	Magnetic Resonance Imaging	2011	N	Not MS
Sue C.M., Yiannikas C., Clouston P.D., Lim C.L., Graham S.	Transcranial cortical stimulation in disorders of the central motor pathways	Journal of Clinical Neuroscience	1997	N	Not original research
Sullivan B.J., Kadam S.D.	The involvement of neuronal chloride transporter deficiencies in epilepsy	Neuronal Chloride Transporters in Health and Disease	2020	N	Not MS
Sun C., Liu X., Bao C., Wei F., Gong Y., Li Y., Liu J.	Advanced non-invasive MRI of neuroplasticity in ischemic stroke: Techniques and applications	Life Sciences	2020	N	Not MS
Suppa A., Quartarone A., Siebner H., Chen R., Di Lazzaro V., Del Giudice P., Paulus W., Rothwell J.C., Ziemann U., Classen J.	The associative brain at work: Evidence from paired associative stimulation studies in humans	Clinical Neurophysiology	2017	N	Not MS
Susser E., Ritsner M.S.	Brain protection in neuropsychiatric disorders: Past, present and future challenges	Brain Protection in Schizophrenia, Mood and Cognitive Disorders	2010	N	Not MS
Swanson, CW; Proessl, F; Stephens, JA; Miravalle, AA; Fling, BW	Non-invasive brain stimulation to assess neurophysiologic underpinnings of lower limb motor impairment in multiple sclerosis	JOURNAL OF NEUROSCIENCE METHODS	2021	Y
Symons G.F., Clough M., Fielding J., O'Brien W.T., Shepherd C.E., Wright D.K., Shultz S.R.	The Neurological Consequences of Engaging in Australian Collision Sports	Journal of Neurotrauma	2020	N	Not MS
Szopa A., Soca?a K., Serefko A., Doboszewska U., Wróbel A., Poleszak E., Wla? P.	Purinergic transmission in depressive disorders	Pharmacology and Therapeutics	2021	N	Not MS
Takeuchi, N; Ikoma, K; Chuma, T; Matsuo, Y	Measurement of transcallosal inhibition in traumatic brain injury by transcranial magnetic stimulation	BRAIN INJURY	2006	N	Not MS
Tan L., Liu X., Dou H., Hou Y.	Characteristics and regulation of mesenchymal stem cell plasticity by the microenvironment — specific factors involved in the regulation of MSC plasticity	Genes and Diseases	2022	N	Not MS
Taraoglu, C; Genc, A; Idiman, E; Cakmur, R; Idiman, F	Cortical silent period and motor evoked potentials in patients with multiple sclerosis	CLINICAL NEUROLOGY AND NEUROSURGERY	2003	Y
Tarnawa I.	Exploring the role of sodium channel inhibitors in neurological and psychiatric disorders	Drugs of the Future	2012	N	No TMS
Taubert M., Villringer A., Lehmann N.	Endurance exercise as an “endogenous” neuro-enhancement strategy to facilitate motor learning	Frontiers in Human Neuroscience	2015	N	Not MS
Taylor A.G., Goehler L.E., Galper D.I., Innes K.E., Bourguignon C.	Top-Down and Bottom-Up Mechanisms in Mind-Body Medicine: Development of an Integrative Framework for Psychophysiological Research	Explore: The Journal of Science and Healing	2010	N	No TMS
Taylor M.A., Fink M.	Melancholia: The diagnosis, pathophysiology, and treatment of depressive illness	Melancholia: The Diagnosis, Pathophysiology, and Treatment of Depressive Illness	2006	N	Not MS
Taylor M.A., Vaidya N.A.	Descriptive psychopathology: The signs and symptoms of behavioral disorders	Descriptive Psychopathology: The Signs and Symptoms of Behavioral Disorders	2009	N	Not MS
Teo W.-P.	Using technology to improve cognitive function: Fact or fiction?	Nutrition for Brain Health and Cognitive Performance	2015	N	Not MS
Teo W.-P., Goodwill A.M., Enticott P.G.	New clinical neuroscience technologies for treating neurodegenerative disorders	Degenerative Disorders of the Brain	2019	N	Not MS
Terney, D; Chaieb, L; Moliadze, V; Antal, A; Paulus, W	Increasing Human Brain Excitability by Transcranial High-Frequency Random Noise Stimulation	JOURNAL OF NEUROSCIENCE	2008	N	Not MS
Terranova C., Rizzo V., Cacciola A., Chillemi G., Calamuneri A., Milardi D., Quartarone A.	Is there a future for non-invasive brain stimulation as a therapeutic tool?	Frontiers in Neurology	2019	N	Not MS
Thabit, MN; Ueki, Y; Koganemaru, S; Fawi, G; Fukuyama, H; Mima, T	Movement-Related Cortical Stimulation Can Induce Human Motor Plasticity	JOURNAL OF NEUROSCIENCE	2010	N	Not MS
Thaut M.H.	Rhythm, music, and the brain: Scientific foundations and clinical applications	Rhythm, Music, and the Brain: Scientific Foundations and Clinical Applications	2005	N	Not MS
Thompson D.M., Koppes A.N., Hardy J.G., Schmidt C.E.	Electrical stimuli in the central nervous system microenvironment	Annual Review of Biomedical Engineering	2014	N	Not MS
Tippett D.C., Godin B.R., Oishi K., Oishi K., Davis C., Gomez Y., Trupe L.A., Kim E.H., Hillis A.E.	Impaired Recognition of Emotional Faces after Stroke Involving Right Amygdala or Insula	Seminars in Speech and Language	2018	N	Not MS
Tomassini, V; Jbabdi, S; Kincses, ZT; Bosnell, R; Douaud, G; Pozzilli, C; Matthews, PM; Johansen-Berg, H	Structural and Functional Bases for Individual Differences in Motor Learning	HUMAN BRAIN MAPPING	2011	N	Not MS
Tomescu M.I., Rihs T.A., Rochas V., Hardmeier M., Britz J., Allali G., Fuhr P., Eliez S., Michel C.M.	From swing to cane: Sex differences of EEG resting-state temporal patterns during maturation and aging	Developmental Cognitive Neuroscience	2018	N	Not MS
Toschi, N; Duggento, A; Passamonti, L	Functional connectivity in amygdalar-sensory/(pre)motor networks at rest: new evidence from the Human Connectome Project	EUROPEAN JOURNAL OF NEUROSCIENCE	2017	N	Not MS
Tran K., Shi Z., Karmonik C., John B., Rajab H., Helekar S.A., Boone T., Khavari R.	Therapeutic effects of non-invasive, individualized, transcranial neuromodulation treatment for voiding dysfunction in multiple sclerosis patients: study protocol for a pilot clinical trial	Pilot and Feasibility Studies	2021	Y
Tranchant C.	What is the role of other complementary examination?	Revue Neurologique	2006	N	No TMS
Traub R., Whittington M.	Cortical Oscillations in Health and Disease	Cortical Oscillations in Health and Disease	2010	N	Not MS
Tringali S., Perrot X., Collet L., Moulin A.	Repetitive transcranial magnetic stimulation: Hearing safety considerations	Brain Stimulation	2012	N	Not MS
Truffert, A; Alisauskiene, M; Vaiciene, N; Magistris, MR	A clinical study of corticospinal and peripheral conductions to proximal lower limb muscles	CLINICAL NEUROPHYSIOLOGY	2007	N	Not MS
Truong D.Q., Bikson M.	Physics of Transcranial Direct Current Stimulation Devices and Their History	Journal of ECT	2018	N	Not MS
Tsai B.S., Sweetow R.W., Cheung S.W.	Audiometric asymmetry and tinnitus laterality	Laryngoscope	2012	N	Not MS
Tu Y., Cao J., Bi Y., Hu L.	Magnetic resonance imaging for chronic pain: diagnosis, manipulation, and biomarkers	Science China Life Sciences	2021	N	Not MS
Tungland B.	Human microbiota in health and disease: From pathogenesis to therapy	Human Microbiota in Health and Disease: From Pathogenesis to Therapy	2018	N	Not MS
Turco C.V., Arsalan S.O., Nelson A.J.	The influence of recreational substance use in tms research	Brain Sciences	2020	N	Not MS
Turco C.V., El-Sayes J., Savoie M.J., Fassett H.J., Locke M.B., Nelson A.J.	Short- and long-latency afferent inhibition; uses, mechanisms and influencing factors	Brain Stimulation	2018	N	Not MS
Turner M.R., Modo M.	Advances in the application of MRI to amyotrophic lateral sclerosis	Expert Opinion on Medical Diagnostics	2010	N	Not MS
Twomey, R; Aboodarda, SJ; Kruger, R; Culos-Reed, SN; Temesi, J; Millet, GY	Neuromuscular fatigue during exercise: Methodological considerations, etiology and potential role in chronic fatigue	NEUROPHYSIOLOGIE CLINIQUE-CLINICAL NEUROPHYSIOLOGY	2017	N	Not MS
Urban P.P.	Transcranial magnetic stimulation: Role in the evaluation of disability in multiple sclerosis - Commentary	Neurology India	2005	Y
Urban P.P., Wicht S., Hopf H.C.	Sensitivity of transcranial magnetic stimulation of cortico-bulbar vs. cortico-spinal tract involvement in Amyotrophic Lateral Sclerosis (ALS)	Journal of Neurology	2001	N	Not MS
Urbanski M.	Visualizing the blind brain: Brain imaging of visual field defects from early recovery to rehabilitation techniques	Frontiers in Integrative Neuroscience	2014	N	Not MS
Vacher P., Charlanes A., Chesnel C., Pagès A., Malot C., Le Breton F., Amarenco G., Manceau P.	Interest of transcranial stimulation in pelvic and perineal disorders [Intérêt de la stimulation transcrânienne dans les troubles pelvi-périnéaux]	Progres en Urologie	2019	N	Not English
Van Den Bossche M.J.A., Emsell L., Dols A., Vansteelandt K., De Winter F.-L., Van den Stock J., Sienaert P., Stek M.L., Bouckaert F., Vandenbulcke M.	Hippocampal volume change following ECT is mediated by rs699947 in the promotor region of VEGF	Translational Psychiatry	2019	N	No TMS
Van Deventer E.	Environmental health criteria 238: Extremely low frequency fields	Environmental Health Criteria	2007	N	No TMS
Van Soens I., Van Ham L.M.	Assessment of motor pathways by magnetic stimulation in human and veterinary medicine	Veterinary Journal	2011	N	Not original research
Váša F., Griffa A., Scariati E., Schaer M., Urben S., Eliez S., Hagmann P.	An affected core drives network integration deficits of the structural connectome in 22q11.2 deletion syndrome	NeuroImage: Clinical	2016	N	Not MS
Veauthier C., Paul F.	Multiple Sclerosis	Handbook of Sleep Disorders in Medical Conditions	2019	Y
Veintramuthu S., Gunasekaran V., Ramanathan M., Selvaraj D.	Tuberoinfundibular peptide of 39 attenuates chronic unpredictable mild stress induced HPA axis dysregulation, inflammation and oxidative damage in depressive rats	Current Bioactive Compounds	2018	N	No TMS
Villa C., Lavitrano M., Salvatore E., Combi R.	Molecular and imaging biomarkers in Alzheimer’s disease: A focus on recent insights	Journal of Personalized Medicine	2020	N	No TMS
Viseux F.J.F.	The sensory role of the sole of the foot: Review and update on clinical perspectives	Neurophysiologie Clinique	2020	N	No TMS
Vitale C., Amboni M., Erro R., Picillo M., Pellecchia M.T., Barone P., Trojano L., Santangelo G.	Parkinson’s disease management and impulse control disorders: current state and future perspectives	Expert Review of Neurotherapeutics	2019	N	Not MS
Vitorio R., Stuart S., Rochester L., Alcock L., Pantall A.	fNIRS response during walking — Artefact or cortical activity? A systematic review	Neuroscience and Biobehavioral Reviews	2017	N	No TMS
Voerman G.E., Gregori? M., Hermens H.J.	Neurophysiological methods for the assessment of spasticity: The Hoffman reflex, the tendon reflex, and the stretch reflex	Disability and Rehabilitation	2005	N	Not MS
Vo?tenkov VB, Komantsev VN, Skripchenko NV, Ivanova GP, Surovtseva AV, Klimkin AV.	[Central motor pathways in children with multiple sclerosis]	Vestn Ross Akad Med Nauk	2013	N	Not adults
Voss M.W., Vivar C., Kramer A.F., van Praag H.	Bridging animal and human models of exercise-induced brain plasticity	Trends in Cognitive Sciences	2013	N	Not MS
Vucic S.	Cortical dysfunction in multiple sclerosis-developing a biomarker of disease severity	Multiple Sclerosis	2009	Y
Vucic S., Kiernan M.C.	Transcranial Magnetic Stimulation for the Assessment of Neurodegenerative Disease	Neurotherapeutics	2017	N	Not MS
Wahl, M; Lauterbach-Soon, B; Hattingen, E; Jung, P; Singer, O; Volz, S; Klein, JC; Steinmetz, H; Ziemann, U	Human motor corpus callosum: Topography, somatotopy, and link between microstructure and function	JOURNAL OF NEUROSCIENCE	2007	N	Not MS
Walters A., Claßen J., Zettl U.K., Kunesch E.	Diagnostic relevance of evoked potentials in multiple sclerosis [Bedeutung der evozierten potenziale in der diagnostik der multiplen sklerose]	Nervenheilkunde	2002	N	Not English
Wang D., Shi L., Chu W.C.W., Burwell R.G., Cheng J.C.Y., Ahuja A.T.	Abnormal cerebral cortical thinning pattern in adolescent girls with idiopathic scoliosis	NeuroImage	2012	N	Not MS
Wang F., Cao Y., Ma L., Pei H., Rausch W.D., Li H.	Dysfunction of Cerebrovascular Endothelial Cells: Prelude to Vascular Dementia	Frontiers in Aging Neuroscience	2018	N	Not MS
Wang Q., Jie W., Liu J.-H., Yang J.-M., Gao T.-M.	An astroglial basis of major depressive disorder? An overview	GLIA	2017	N	Not MS
Wang W.-Z., Liu X., Yang Z.-Y., Wang Y.-Z., Lu H.-T.	Diffusion tensor imaging of the hippocampus reflects the severity of hippocampal injury induced by global cerebral ischemia/reperfusion injury	Neural Regeneration Research	2022	N	Not MS
Wang X., Gerken M., Dennis M., Mooney R., Kane J., Khuder S., Xie H., Bauer W., Apkarian A.V., Wall J.	Profiles of precentral and postcentral cortical mean thicknesses in individual subjects over acute and subacute time-scales	Cerebral Cortex	2010	N	Not MS
Wang Y.	Remodeling of lumbar motor circuitry remote to a thoracic spinal cord injury promotes locomotor recovery	eLife	2018	N	Not MS
Wang Y., Liu G., Hong D., Chen F., Ji X., Cao G.	White matter injury in ischemic stroke	Progress in Neurobiology	2016	N	Not MS
Weber M., Eisen A.A.	Magnetic stimulation of the central and peripheral nervous systems	Muscle and Nerve	2002	N	Not MS
Weintraub M.I.	Magnetotherapy: Historical background with a stimulating future	Critical Reviews in Physical and Rehabilitation Medicine	2004	N	Not MS
Weiss A.	The electroconvulsive therapy workbook: Clinical applications	The Electroconvulsive Therapy Workbook: Clinical Applications	2018	N	Not MS
Weiss S.A., Faber D.S.	Field effects in the CNS play functional roles	Frontiers in Neural Circuits	2010	N	Not MS
Welch K.M.A.	Research developments in the physiopathology of primary headaches	Neurological Sciences	2004	N	Not MS
Weyandt L.L.	The physiological bases of cognitive and behavioral disorders	The Physiological Bases of Cognitive and Behavioral Disorders	2005	N	Not MS
Wieraszko A.	Amplification of evoked potentials recorded from mouse hippocampal slices by very low repetition rate pulsed magnetic fields	Bioelectromagnetics	2004	N	Not MS
Wilhelm H.	Disorders of the pupil	Handbook of Clinical Neurology	2011	N	Not MS
Winstein C.J., Stein J., Arena R., Bates B., Cherney L.R., Cramer S.C., Deruyter F., Eng J.J., Fisher B., Harvey R.L., Lang C.E., MacKay-Lyons M., Ottenbacher K.J., Pugh S., Reeves M.J., Richards L.G., Stiers W., Zorowitz R.D.	Guidelines for Adult Stroke Rehabilitation and Recovery: A Guideline for Healthcare Professionals from the American Heart Association/American Stroke Association	Stroke	2016	N	Not MS
Wischnewski M., Joergensen M.L., Compen B., Schutter D.J.L.G.	Frontal Beta Transcranial Alternating Current Stimulation Improves Reversal Learning	Cerebral Cortex	2020	N	Not MS
Wolfe D.L., Hayes K.C., Hsieh J.T.C., Potter P.J.	Effects of 4-aminopyridine on motor evoked potentials in patients with spinal cord injury: A double-blinded, placebo-controlled crossover trial	Journal of Neurotrauma	2001	N	Not MS
Wolters C.H., Antonakakis M., Khan A., Piastra M.C., Vorwerk J.	Characterization of the somatosensory system	Neuromethods	2021	N	Not MS
Wong C.H.Y., Liu J., Lee T.M.C., Tao J., Wong A.W.K., Chau B.K.H., Chen L., Chan C.C.H.	Fronto-cerebellar connectivity mediating cognitive processing speed	NeuroImage	2021	N	Not MS
Woo C.-W., Chang L.J., Lindquist M.A., Wager T.D.	Building better biomarkers: Brain models in translational neuroimaging	Nature Neuroscience	2017	N	Not MS
Wu D., Zhou Y., Lv H., Liu N., Zhang P.	The initial visual performance modulates the effects of anodal transcranial direct current stimulation over the primary visual cortex on the contrast sensitivity function	Neuropsychologia	2021	N	Not MS
Wurzman R.P., Hamilton R.H.	Ethical aspects of tDCS use in neuropsychiatry and the risk of misuse	Transcranial Direct Current Stimulation in Neuropsychiatric Disorders: Clinical Principles and Management	2016	N	Not MS
Yahagi, S; Ni, Z; Takahashi, M; Takeda, Y; Tsuji, T; Kasai, T	Excitability changes of motor evoked potentials dependent on muscle properties and contraction modes	MOTOR CONTROL	2003	N	Not MS
Yamakawa T, Yoshikawa H, Arai A, Miyazaki T, Ichikawa G.	A clinical study on the magnetic stimulation of the facial nerve	Laryngoscope	1999	N	Not MS
Yao J., Li X., Zhang W., Lin X., Lyu X., Lou W., Peng W.	Analgesia induced by anodal tDCS and high-frequency tRNS over the motor cortex: Immediate and sustained effects on pain perception	Brain Stimulation	2021	N	Not MS
Young J.W., Powell S.B., Risbrough V., Marston H.M., Geyer M.A.	Using the MATRICS to guide development of a preclinical cognitive test battery for research in schizophrenia	Pharmacology and Therapeutics	2009	N	Not MS
Yu K., Niu X., He B.	Neuromodulation Management of Chronic Neuropathic Pain in the Central Nervous System	Advanced Functional Materials	2020	N	Not MS
Zang Y., Zhang Y., Lai X., Yang Y., Guo J., Gu S., Zhu Y.	Repetitive Transcranial Magnetic Stimulation for Neuropathic Pain on the Non-Motor Cortex: An Evidence Mapping of Systematic Reviews	Evidence-based Complementary and Alternative Medicine	2021	N	Not MS
Zangrandi A., D'Alonzo M., Cipriani C., Di Pino G.	Neurophysiology of slip sensation and grip reaction: Insights for hand prosthesis control of slippage	Journal of Neurophysiology	2021	N	Not MS
Zarei S., Carr K., Reiley L., Diaz K., Guerra O., Altamirano P.F., Pagani W., Lodin D., Orozco G., Chinea A.	A comprehensive review of amyotrophic lateral sclerosis	Surgical Neurology International	2015	N	Not MS
Zarubin G., Gundlach C., Nikulin V., Villringer A., Bogdan M.	Transient Amplitude Modulation of Alpha-Band Oscillations by Short-Time Intermittent Closed-Loop tACS	Frontiers in Human Neuroscience	2020	N	Not MS
Zettin M., Bondesan C., Nada G., Varini M., Dimitri D.	Transcranial Direct-Current Stimulation and Behavioral Training, a Promising Tool for a Tailor-Made Post-stroke Aphasia Rehabilitation: A Review	Frontiers in Human Neuroscience	2021	N	Not MS
Zhang F., Daducci A., He Y., Schiavi S., Seguin C., Smith R.E., Yeh C.-H., Zhao T., O'Donnell L.J.	Quantitative mapping of the brain's structural connectivity using diffusion MRI tractography: A review	NeuroImage	2022	N	No TMS
Zhang J., Tian L., Zhang L., Cheng R., Wei R., He F., Li J., Luo B., Ye X.	Relationship between white matter integrity and post-traumatic cognitive deficits: A systematic review and meta-analysis	Journal of Neurology, Neurosurgery and Psychiatry	2019	N	Not MS
Zhang L., Sun H., Zhao J., Lee J., Ee Low L., Gong L., Chen Y., Wang N., Zhu C., Lin P., Liang Z., Wei M., Ling D., Li F.	Dynamic nanoassemblies for imaging and therapy of neurological disorders	Advanced Drug Delivery Reviews	2021	N	No TMS
Zhang Y.	Low-Field Magnetic Stimulation (LFMS) decreases cuprizone-induced cognitive impairment and brain pathology in mice	European Neuropsychopharmacology	2019	N	Not humans
Zhang Y., Bi X., Adebiyi O., Wang J., Mooshekhian A., Cohen J., Wei Z., Wang F., Li X.-M.	Venlafaxine improves the cognitive impairment and depression-like behaviors in a cuprizone mouse model by alleviating demyelination and neuroinflammation in the brain	Frontiers in Pharmacology	2019	N	Not humans
Zhou J., Lo O.-Y., Lipsitz L.A., Zhang J., Fang J., Manor B.	Transcranial direct current stimulation enhances foot sole somatosensation when standing in older adults	Experimental Brain Research	2018	N	Not MS
Zhou Y.	Imaging and multiomic biomarker applications: Advances in early alzheimer’s disease	Imaging and Multiomic Biomarker Applications	2021	N	Not MS
Zhou Y.	Neuroimaging in mild traumatic brain injury	Neuroimaging in Mild Traumatic Brain Injury	2017	N	Not MS
Zhu D.-M., Yang Y., Zhang Y., Wang C., Wang Y., Zhang C., Zhao W., Zhu J.	Cerebellar-cerebral dynamic functional connectivity alterations in major depressive disorder	Journal of Affective Disorders	2020	N	Not MS
Zieli?ska-Nowak E., W?odarczyk L., Kostka J., Miller E.?.B.	New strategies for rehabilitation and pharmacological treatment of fatigue syndrome in multiple sclerosis	Journal of Clinical Medicine	2020	Y
Ziemann U., Wahl M., Hattingen E., Tumani H.	Development of biomarkers for multiple sclerosis as a neurodegenerative disorder	Progress in Neurobiology	2011	Y
Zihl J.	Rehabilitation of visual disorders after brain injury: 2nd edition	Rehabilitation of Visual Disorders After Brain Injury: 2nd Edition	2010	N	Not MS
Zipser C.M.	TEP propagation in early RRMS patients and controls; A TMS-EEG study	Klinische Neurophysiologie	2013	Y
Zis P.	Safety, Tolerability, and Nocebo Phenomena During Transcranial Magnetic Stimulation: A Systematic Review and Meta-Analysis of Placebo-Controlled Clinical Trials	Neuromodulation	2020	N	Not MS
Zortea M., Ramalho L., Alves R.L., Alves C.F.S., Braulio G., Torres I.L.S., Fregni F., Caumo W.	Transcranial Direct Current Stimulation to Improve the Dysfunction of Descending Pain Modulatory System Related to Opioids in Chronic Non-cancer Pain: An Integrative Review of Neurobiology and Meta-Analysis	Frontiers in Neuroscience	2019	N	Not MS
Zwoli?ska J., Kwolek A., G?sior M.	The effectiveness of physical factors used in the treatment of patients with Multiple Sclerosis. Literature review [Skuteczno?? czynników fizykalnych wykorzystywanych w leczeniu osób ze stwardnieniem rozsianym. Przegl?d pi?miennictwa]	Postepy Rehabilitacji	2015	N	Not English

## Sheet: Abstract Review
Authors	Title	Abstract	Journal	Year	Verdict	Rationale
Abrams B.M., Waldman H.J.	Electromyography and evoked potentials		Practical Management of Pain: Fifth Edition	2013	N	Not original research
Absalom A.R., Grundy B.L., Lee M.	Monitoring the central nervous system		Wylie and Churchill-Davidsons: A Practice of Anesthesia, Seventh Edition	2003	N	Not original research
Caramia MD, et al.	Brain Excitability Changes in the Relapsing and Remitting Phases of Multiple Sclerosis: A Study with Transcranial Magnetic Stimulation	Objective: Recent functional and imaging studies have substantially contributed to extend the concept of multiple sclerosis (MS), classically regarded as a disease limited to the myelin axonal sheath. Several findings, in fact, point to a parallel involvement of neuronal components of the central nervous system (CNS) in the course of MS. In the present study, therefore, we explored, in MS patient…	Clinical Neurophysiology	2004	Y
Amato M.P., Prestipino E., Bellinvia A.	Identifying risk factors for cognitive issues in multiple sclerosis	Introduction: Cognitive impairment (CI) in Multiple Sclerosis (MS) has progressively regained clinical and research interest and is currently recognized as a debilitating and burdensome problem for these patients. Studying risk and protecting factors that may influence the development and course of CI is currently an area of increasing interest, due to the potential for preventive strategies. Are…	Expert Review of Neurotherapeutics	2019	N	Not original research
Balloff C, Penner IK, Ma M, Georgiades I, Scala L, Troullinakis N, Graf J, Kremer D, Aktas O, Hartung HP, Meuth SG, Schnitzler A, Groiss SJ, Albrecht P.	The degree of cortical plasticity correlates with cognitive performance in patients with Multiple Sclerosis	Background Cortical reorganization and plasticity may compensate for structural damage in Multiple Sclerosis (MS). It is important to establish sensitive methods to measure these compensatory mechanisms, as they may be of prognostic value. Objective To investigate the association between the degree of cortical plasticity and cognitive performance and to compare plasticity between MS patients and …	Brain Stimul	2022	Y
Balloff C.	Synaptic plasticity is reduced in patients with rrms compared to healthy controls and associated with neuropsychological outcomes		Multiple Sclerosis Journal	2020	N	Conference
Bar-Or A., Pachner A., Menguy-Vacheron F., Kaplan J., Wiendl H.	Teriflunomide and its mechanism of action in multiple sclerosis	Treatment of multiple sclerosis (MS) is challenging: disease-modifying treatments (DMTs) must both limit unwanted immune responses associated with disease initiation and propagation (as T and B lymphocytes are critical cellular mediators in the pathophysiology of relapsing MS), and also have minimal adverse impact on normal protective immune responses. In this review, we summarize key preclinical…	Drugs	2014	N	No TMS
[No author]	Diagnostic relevance of evoked potentials in multiple sclerosis		Nervenheilkunde (2002) 21:2 (69-73). Date of Publication: 2002	2002	N	Not English
Bertoli M.	Fatigue in multiple sclerosis: Does the functional or structural damage prevail?	Fatigue in multiple sclerosis (MS) is a highly invalidating symptom, lacking efficacious drugs. This topical review aims at assessing the signs in the literature of functional versus structural damage prevalence at the origin of MS fatigue by focusing on papers that assessed the two counterparts in the same patients, paying attention that the fatigue levels do not correlate with clinical severity…	Multiple Sclerosis Journal	2020	N	Not original research
Bolbocean O.	Motor evoked potentials modification in different forms and stages of multiple sclerosis	Background: In patients with Multiple Sclerosis (MS), transcranial magnetic stimulation (TMS) has shown significant prolongation of central motor conduction time (CMCT). Abnormal CMCT may reflect sub-clinical involvement of motor pathways and correlate with clinical motor disability.The present study was undertaken to determine the diagnostic yield of TMS in MS, to assess the strength of the corr…	Romanian Journal of Neurology/ Revista Romana de Neurologie	2009	Y
Bonfiglio L., Rossi B., Sartucci F.	Prolonged intracortical delay of long-latency reflexes: Electrophysiological evidence for a cortical dysfunction in multiple sclerosis	Convincing evidence suggests that long-latency reflexes (LLRs) are capable of testing the transcortical sensorimotor reflex arch. By subtracting the sum of the latencies of N20 (afferent branch) and transcranially elicited motor evoked potentials (MEP; efferent branch) from the LLR II latency, the cortical relay time (CRT) can also be obtained, which is alleged to represent the time required for …	Brain Research Bulletin	2006	Y
Boniface SJ, Schubert M, Mills KR.	Suppression and long latency excitation of single spinal motoneurons by transcranial magnetic stimulation in health, multiple sclerosis, and stroke	Whether or not suppression at the level of the spinal motoneuron plays a role in motor deficits such as central paresis is unknown. In this study suppression in the firing of tonically active low threshold single motoneurons following low intensity transcranial magnetic stimulation is described in health and disease. Changes in firing probability in the absence of an early excitatory response wer…	Muscle Nerve	1994	N	No comparison
Bonzano L.	Hand motor performance as a new quantitative clinical endpoint in MS: Longitudinal evaluation in patients with CIS and correlation with accumulation of disability and tissue integrity at MRI		Multiple Sclerosis Journal	2016	N	Conference
Boroojerdi B., Hungs M., Mull M., Töpper R., Noth J.	Interhemispheric inhibition in patients with multiple sclerosis	Objectives: A single focal magnetic stimulus applied to the motor cortex of normal subjects can suppress ongoing voluntary electromyographic activity in ipsilateral small hand muscles. This inhibition is mediated from one motor cortex to the contralateral side via a transcallosal pathway. Methods: We have investigated transcallosal inhibition in 24 patients with definite multiple sclerosis (MS) a…	Electroencephalography and Clinical Neurophysiology - Electromyography and Motor Control	1998	Y
Cabib C., Llufriu S., Martinez-Heras E., Saiz A., Valls-Solé J.	Enhanced mirror activity in 'crossed' reaction time tasks in multiple sclerosis	Objective: Execution of unimanual voluntary motor tasks requires appropriate inhibitory control over contralateral motor output. Such inhibition should involve interhemispheric connections, which are often damaged in multiple sclerosis (MS). Methods: Twenty mildly-disabled MS patients and 13 healthy subjects performed ipsilateral and contralateral wrist-extension reactions (IR and CR, respectivel…	Clinical Neurophysiology	2016	N	No TMS
Cabib, C; Llufriu, S; Casanova-Molla, J; Saiz, A; Valls-Sole, J	Defective sensorimotor integration in preparation for reaction time tasks in patients with multiple sclerosis	Slowness of voluntary movements in patients with multiple sclerosis (MS) may be due to various factors, including attentional and cognitive deficits, delays in motor conduction time, and impairment of specific central nervous system circuits. In 13 healthy volunteers and 20 mildly disabled, relapsing-remitting MS patients, we examined simple reaction time (SRT) tasks requiring sensorimotor integr…	JOURNAL OF NEUROPHYSIOLOGY	2015	N	No TMS
Chalah, MA; Lefaucheur, JP; Creange, A; Ayache, SS	Cortical excitability and alexithymia in multiple sclerosis: a transcranial magnetic stimulation study		Multiple Sclerosis Journal	2017	N	Conference
Chalah, MA; Palm, U; Lefaucheur, JP; Creange, A; Ayache, SS	Interhermispheric inhibition predicts anxiety levels in multiple sclerosis: A corticospinal excitability study	Background: Depression and anxiety stand among the most frequent and debilitating complaints in multiple sclerosis (MS) patients. Understanding their neurophysiological correlates might improve their management. To date, no single study has addressed this issue. Method: Patients completed the Hospital Anxiety and Depression Scale (HADS). Transcranial magnetic stimulation (TMS) was performed to ob…	BRAIN RESEARCH	2018	N	No comparison
Chalah, MA; Riachi, N; Ahdab, R; Creange, A; Lefaucheur, JP; Ayache, SS	Fatigue in Multiple Sclerosis: Neural Correlates and the Role of Non-Invasive Brain Stimulation	Multiple sclerosis (MS) is a chronic progressive inflammatory disease of the central nervous system (CNS) and the major cause of non-traumatic disability in young adults. Fatigue is a frequent symptom reported by the majority of MS patients during their disease course and drastically affects their quality of life. Despite its significant prevalence and impact, the underlying pathophysiological me…	FRONTIERS IN CELLULAR NEUROSCIENCE	2015	N	Not original research
Charvet L., Shaw M., Dobbs B., Frontario A., Sherman K., Bikson M., Datta A., Krupp L., Zeinapour E., Kasschau M.	Remotely Supervised Transcranial Direct Current Stimulation Increases the Benefit of At-Home Cognitive Training in Multiple Sclerosis		Neuromodulation	2018	N	No TMS
Chaves A.R.	Asymmetry of Brain Excitability: A New Biomarker that Predicts Objective and Subjective Symptoms in Multiple Sclerosis	Objectives: Investigate whether asymmetrical corticospinal excitability exists in Multiple Sclerosis (MS) and its association with MS symptoms. Methods: Bilateral resting and active motor thresholds (RMT, AMT) were gathered using transcranial magnetic stimulation among 82 MS patients. Corticospinal excitability (CSE) asymmetry was expressed as the ratio between weaker and stronger sides' RMT and …	Behavioural Brain Research	2019	N	No comparison
Chaves AR, Kenny HM, Snow NJ, Pretty RW, Ploughman M.	Sex-specific disruption in corticospinal excitability and hemispheric (a)symmetry in multiple sclerosis	Multiple Sclerosis (MS) is a neurodegenerative disease in which pathophysiology and symptom progression presents differently between the sexes. In a cohort of people with MS (n = 110), we used transcranial magnetic stimulation (TMS) to investigate sex differences in corticospinal excitability (CSE) and sex-specific relationships between CSE and cognitive function. Although demographics and diseas…	Brain Res	2021	N	No comparison
Chaves, AR; Devasahayam, AJ; Riemenschneider, M; Pretty, RW; Ploughman, M	Walking Training Enhances Corticospinal Excitability in Progressive Multiple Sclerosis-A Pilot Study	Background: Inflammatory lesions and neurodegeneration lead to motor, cognitive, and sensory impairments in people with multiple sclerosis (MS). Accumulation of disability is at least partially due to diminished capacity for neuroplasticity within the central nervous system. Aerobic exercise is a potentially important intervention to enhance neuroplasticity since it causes upregulation of neurotr…	FRONTIERS IN NEUROLOGY	2020	Y
Chaves, AR; Kelly, LP; Moore, CS; Stefanelli, M; Ploughman, M	Prolonged cortical silent period is related to poor fitness and fatigue, but not tumor necrosis factor, in Multiple Sclerosis	Objective: Poor fitness among people with Multiple Sclerosis (MS) aggravates disease symptoms. Whether low fitness levels accompany brain functioning changes is unknown. Methods: MS patients (n = 82) completed a graded maximal exercise test, blood was drawn, and transcranial magnetic stimulation determined resting and active motor thresholds, motor evoked potential latency, and cortical silent pe…	CLINICAL NEUROPHYSIOLOGY	2019	N	No comparison
Chaves, AR; Kenny, HM; Snow, NJ; Pretty, RW; Ploughman, M	Sex-specific disruption in corticospinal excitability and hemispheric (a) symmetry in multiple sclerosis		BRAIN RESEARCH	2021	N	Not original research
Chen R.	Diagnostic utility of TMS		Clinical Neurophysiology	2014	N	Not original research
Chen R., Petrescu N.	Diagnostic and therapeutic role of magnetic stimulation in neurology		Aminoff's Electrodiagnosis in Clinical Neurology	2012	N	Not original research
Chen, R; Cros, D; Curra, A; Di Lazzaro, V; Lefaucheur, JP; Magistris, MR; Mills, K; Roesler, KM; Triggs, WJ; Ugawa, Y; Ziemann, U	The clinical diagnostic utility of transcranial magnetic stimulation: Report of an IFCN committee	The review focuses on the clinical diagnostic utility of transcranial magnetic stimulation (TMS). The central motor conduction time (CMCT) is a sensitive method to detect myelopathy and abnormalities may be detected in the absence of radiological changes. CMCT may also detect upper motor neuron involvement in amyotrophic lateral sclerosis. The diagnostic sensitivity may be increased by using the …	CLINICAL NEUROPHYSIOLOGY	2008	Y
Compston A., McDonald I., Noseworthy J., Lassmann H., Miller D., Smith K., Wekerle H., Confavreux C.	McAlpine's Multiple Sclerosis		McAlpine's Multiple Sclerosis	2006	N	Not original research
Créange A, Lefaucheur JP, Balleyguier MO, Galactéros F.	Iron depletion induced by bloodletting and followed by rhEPO administration as a therapeutic strategy in progressive multiple sclerosis: a pilot, open-label study with neurophysiological measurements	Objectives: To evaluate the concept that iron depletion (ID) induced by bloodletting and followed by recombinant human erythropoietin (rhEPO) administration could be a therapeutic strategy in progressive multiple sclerosis (PMS) and that it could be assessed by neurophysiological measurements. Patients and methods: In four patients with PMS, bloodletting was performed until ID was induced, and th…	Neurophysiol Clin	2013	Y
Crivelli D, Pedullà L, Bisio A, Rueda MDS, Brichetto G, Bove M, Balconi M.	When "Extraneous" Becomes "Mine". Neurophysiological Evidence of Sensorimotor Integration During Observation of Suboptimal Movement Patterns Performed by People with Multiple Sclerosis		Neuroscience	2018	N	Not English
Cucurachi L, Immovilli P, Granella F, Pavesi G, Cattaneo L.	Short-latency afferent inhibition predicts verbal memory performance in patients with multiple sclerosis	Background: The pathogenesis of cognitive deficits in multiple sclerosis (MS) patients is the subject of debate. A causative role of grey matter impairment has been suggested. Acetylcholinesterase inhibitors have been proposed in the treatment of cognitive impairment in MS. Short-latency afferent inhibition (SAI) is a cortical phenomenon assessed by a transcranial magnetic stimulation protocol th…	J Neurol	2008	Y
Curra, A; Modugno, N; Inghilleri, M; Manfredi, M; Hallett, M; Berardelli, A	Transcranial magnetic stimulation techniques in clinical investigation	Transcranial magnetic stimulation (TMS) is a technique that can activate cortical motor areas and the corticospinal tract without causing the subject discomfort. Since TMS was introduced, numerous applications of the technique have been developed for the evaluation of neurologic diseases. Standard TMS applications (central motor conduction time, threshold and amplitude of motor evoked potentials)…	NEUROLOGY	2002	N	Not original research
Di Lazzaro, V; Oliviero, A; Profice, P; Ferrara, L; Saturno, E; Pilato, F; Tonali, P	The diagnostic value of motor evoked potentials	Objective: To assess the diagnostic usefulness of motor evoked potentials (MEPs) and to identify the optimal method for calculating the central conduction time. The test results were evaluated in a prospective study of 1023 neurological patients. Methods: We evaluated the correlation between clinical and electrophysiological findings, the accuracy, the sensitivity, the percentage of subclinical a…	CLINICAL NEUROPHYSIOLOGY	1999	Y
Di Sapio A.	Motor evoked potentials from multiple recording sites of the lower limbs as a monitoring tool of central motor function in MS relapsing patients		Multiple Sclerosis Journal	2014	N	Conference
Gagliardo A, et al.	Motor evoked potentials in multiple sclerosis patients without walking limitation: Amplitude vs. conduction time abnormalities	We used Motor Evoked Potentials (MEPs), elicited by transcranial magnetic stimulation, for assessing a motor pathways dysfunction in a selected group of Multiple Sclerosis (MS) patients, without limitation in walking. We selected 32 Relapsing Remitting MS patients, in remission phase, with EDSS < or = 3.5 and 20 healthy individuals with similar height and age distribution. We measured the followi…	Journal of Neurology	2007	Y
Donzé C.	Update on rehabilitation in multiple sclerosis	Given that mobility impairment is a hallmark of multiple sclerosis, people with this disease are likely to benefit from rehabilitation therapy throughout the course of their illness. The review provides an update on rehabilitation focused on balance and walking impairment. Classical rehabilitation focusing on muscle rehabilitation, neurotherapeutic facilitation is effective and recommended. Other…	Presse Medicale	2015	N	Not original research
Doskas T., Vavougios G.D., Karampetsou P., Kormas C., Synadinakis E., Stavrogianni K., Sionidou P., Serdari A., Vorvolakos T., Iliopoulos I., Vadikolias ?.	Neurocognitive impairment and social cognition in multiple sclerosis	Purpose/aim of the study: The impairment of neurocognitive functions occurs in all subtypes of multiple sclerosis, even from the earliest stages of the disease. Commonly reported manifestations of cognitive impairment include deficits in attention, conceptual reasoning, processing efficiency, information processing speed, memory (episodic and working), verbal fluency (language), and executive fun…	International Journal of Neuroscience	2021	N	Not original research
Eisen A.A.	AAEM minimonograph #35: Clinical experience with transcranial magnetic stimulation	We elicited motor evoked potentials (MEPs) using transcortical magnetic stimulation in 150 control subjects aged 14 to 85 years and 275 patients with a variety of diseases. There were no significant side effects. Cortex-to-target muscle latencies measured 20.2 +/- 1.6 ms (thenar), 14.2 +/- 1.7 ms (extensor digitorum communis), 9.4 +/- 1.7 ms (biceps), and 27.2 +/- 2.9 ms (tibialis anterior). Cent…	Muscle and Nerve	1990	Y
Ellwardt E.	Network alterations underlying anxiety symptoms in early multiple sclerosis		Multiple Sclerosis Journal	2021	N	Conference
Fakolade A., Bisson E.J., Pétrin J., Lamarre J., Finlayson M.	Effect of comorbidities on outcomes of neurorehabilitation interventions in multiple sclerosis: A scoping review	Background: Interest in comorbidities has increased in the past few years, but the effect of comorbidities on outcomes of multiple sclerosis (MS) neurorehabilitation interventions is unclear. The aim of this review was to identify and summarize the existing evidence regarding the effect of comorbidities on outcomes of neurorehabilitation interventions targeting people with MS. Methods: Five datab…	International Journal of MS Care	2016	N	Not original research
Fernandez, V	The Use of Motor-Evoked Potentials in Clinical Trials in Multiple Sclerosis	Motor-evoked potentials (MEPs) can be used to assess the integrity of the descending corticospinal tract in the laboratory. Evoked potentials (EPs) have been widely used in the past for the diagnosis of multiple sclerosis (MS), but they are now becoming more useful in assessing the prognosis of the disease. Motor-evoked potentials have been included in EP scales that have demonstrated good correl…	JOURNAL OF CLINICAL NEUROPHYSIOLOGY	2021	Y
Fernandez, V; Valls-Sole, J; Relova, JL; Raguer, N; Miralles, F; Dinca, L; Taramundi, S; Costa-Frossardo, L; Ferrandiz, M; Ramio-Torrenta, L; Villoslada, P; Saiz, A; Callesef, C; Antiguedad, A; Alvarez-Cermeno, JC; Prieto, JM; Izquierdo, G; Montalban, X; Fernandez, Y	Recommendations for the clinical use of motor evoked potentials in multiple sclerosis		NEUROLOGIA	2013	N	Not English
Ferrazzano G.	Early diagnosis of secondary progressive multiple sclerosis: focus on fluid and neurophysiological biomarkers	Background and aims: Most patients with multiple sclerosis presenting with a relapsing-remitting disease course at diagnosis transition to secondary progressive multiple sclerosis (SPMS) 1-2 decades after onset. SPMS is characterized by predominant neurodegeneration and atrophy. These pathogenic hallmarks result in unsatisfactory treatment response in SPMS patients. Therefore, early diagnosis of …	Journal of Neurology	2021	Y
Fierro B, Salemi G, Brighina F, Buffa D, Conte S, La Bua V, Piazza A, Savettieri G.	A transcranial magnetic stimulation study evaluating methylprednisolone treatment in multiple sclerosis	Objective: To investigate the efficacy of two different high doses of intravenous methylprednisolone (IVMP) during Multiple Sclerosis (MS) relapses. Background: Transcranial Magnetic Stimulation (TMS) is the most sensitive neurophysiological ascertainment to quantify motor disability, to follow the recovery from an MS relapse, and to detect the response to treatment. Design and method: Twenty-fou…	Acta Neurol Scand	2002	Y
Fuhr P.	Clinical Neurophysiology in multiple sclerosis - From diagnostic tool to biomarker		Clinical Neurophysiology	2015	N	Not original research
Gianni C.	Abnormal individual finger movement control in MS: A neurophysiological and neuroimaging study		Multiple Sclerosis Journal	2018	N	Conference
Hardmeier M., Schindler C., Kuhle J., Fuhr P.	Validation of Quantitative Scores Derived From Motor Evoked Potentials in the Assessment of Primary Progressive Multiple Sclerosis: A Longitudinal Study	Objective: To evaluate the sensitivity to change of differently calculated quantitative scores from motor evoked potentials (MEP) in patients with primary progressive multiple sclerosis (PPMS). Methods: Twenty patients with PPMS had MEP to upper and lower limbs at baseline, years 1 and 2 measured in addition to clinical assessment [Expanded Disability Status Scale (EDSS), ambulation score]; a sub…	Frontiers in Neurology	2020	Y
Hardmeier, M; Fuhr, P	Multimodal Evoked Potentials as Candidate Prognostic and Response Biomarkers in Clinical Trials of Multiple Sclerosis	Evoked potentials (EPs) measure quantitatively and objectively the alterations of central signal propagation in multiple sclerosis and have long been used for diagnosis. More recently, their utility for prognosis has been demonstrated in several studies, summarizing multiple EP modalities in a single score. In particular, visual, somatosensory, and motor EPs are useful because of their sensitivit…	JOURNAL OF CLINICAL NEUROPHYSIOLOGY	2021	Y
Haug BA, Kukowski B.	Latency and duration of the muscle silent period following transcranial magnetic stimulation in multiple sclerosis, cerebral ischemia, and other upper motoneuron lesions	In muscles with sustained voluntary contraction, EMG activity is transiently inhibited after transcranial magnetic stimulation. We recorded this postexcitatory silent period (SP) at 1.5 times individual stimulus threshold level from the first dorsal interosseus muscle in 65 neurologic patients aged 11 to 80 years. When compared with 20 healthy volunteers and a subgroup of patients with peripheral…	Neurology	1994	Y
Hofstadt-van Oy U.	Clinical isolated syndromes: Sensitivity to detect clinically silent lesions with the triple stimulation technique in comparison to transcranial magnetic stimulation and visual/somatosensory evoked potentials	OBJECTIVE: To compare the sensitivity of the triplestimulation technique (TST), visual (VEP) and somatosensory (SEP) evoked potentials and transcranial magnetic stimulation (TMS) and to detect conduction failure in patients with “clinical isolated syndromes” (CIS). BACKGROUND: Patients with CIS like optic neuritis, myelitis or cerebral inflammatory disease are at high risk to develop multiple scl…	Neurology	2013	Y
Hofstadt-Van Oy U.	Motor conduction, walking ability and cognitive function in patients with clinical isolated syndromes and remitting relapsing multiple sclerosis: A one year follow-up study after initiation of a disease modifying therapy		Multiple Sclerosis Journal	2013	N	Conference
Hofstadt-van Oy U.	Motor-conduction failure in clinical isolated syndromes: Sensitivity to detect clinically silent lesions with transcranial magnetic stimulation and the triple-stimulation technique		Klinische Neurophysiologie	2011	N	Not English
Hofstadt-Van Oy U.	Triple stimulation in patients with clinical isolated syndromes. Sensitivity to detect clinically silent lesions in comparison to transcranial magnetic stimulation and visual/somatosensory evoked potentials		Journal of Neurology	2011	N	Conference
Hofstadt-van Oy, U; Keune, PM; Muenssinger, J; Hagenburger, D; Oschmann, P	Normative data and long-term test-retest reliability of the triple stimulation technique (TST) in multiple sclerosis	Objectives: Transcranial magnetic stimulation is useful for the assessment of cortico-spinal tract integrity in multiple sclerosis (MS). An advanced approach is the triple stimulation technique (TST), utilizing a combination of central and peripheral stimuli, reducing individual response variability. Although TST measures have been implemented in longitudinal studies, basic methodological data on…	CLINICAL NEUROPHYSIOLOGY	2015	Y
Höppner J.	Demyelination and axonal degeneration in corpus callosum assessed by analysis of transcallosally mediated inhibition in multiple sclerosis	Objective: Following focal transcranial magnetic cortex stimulation (fTMS), inhibition of voluntary EMG activity in the ipsilateral first dorsal interosseus (FDI) muscle was studied, in order to assess the functional integrity of the corpus callosum in patients with multiple sclerosis (MS). Methods and results: Thirty-four patients suffering from definite MS and 12 healthy, age-matched normal sub…	Clinical Neurophysiology	1999	Y
Houdayer E., Comi G., Leocani L.	The neurophysiologist perspective into MS plasticity		Frontiers in Neurology	2015	N	Not original research
Julkunen P., Kimiskidis V.K., Belardinelli P.	Bridging the gap: TMS-EEG from lab to clinic		Journal of Neuroscience Methods	2022	N	Not original research
Jung, P; Beyerle, A; Hurnpich, M; Neumann-Haefelin, T; Lanfermann, H; Ziemann, U	Ipsilateral silent period: A marker of callosal conduction abnormality in early relapsing-remitting multiple sclerosis?	Objective: The corpus callosum (CC) is commonly affected in multiple sclerosis (MS). The ipsilateral silent period (iSP) is a putative electrophysiological marker of callosal demyelination. The purpose of this study was to re-assess, under recently established optimised protocol conditions [Jung P., Ziemann U. Differences of the ipsilateral silent period in small hand muscles. Muscle Nerve in pre…	JOURNAL OF THE NEUROLOGICAL SCIENCES	2006	Y
Jung, P; Ziemann, U	Transcranial magnetic stimulation in multiple sclerosis		KLINISCHE NEUROPHYSIOLOGIE	2005	N	Not English
Kan, RLD; Xu, GXJ; Shu, KT; Lai, FHY; Kranz, G; Kranz, GS	Effects of non-invasive brain stimulation in multiple sclerosis: systematic review and meta-analysis	Objective: The objective of this meta-analysis was to summarize evidence on the therapeutic effects of non-invasive brain stimulation (NIBS) on core symptoms of multiple sclerosis (MS). Specifically, findings from studies deploying transcranial direct current stimulation (tDCS) and repetitive transcranial magnetic stimulation (rTMS) protocols were summarized in this review. Methods: We systematic…	THERAPEUTIC ADVANCES IN CHRONIC DISEASE	2022	Y
Kiylioglu N., Parlaz A.U., Akyildiz U.O., Tataroglu C.	Evoked potentials and disability in multiple sclerosis: A different perspective to a neglected method	Objective: Because evoked potentials (EP) are reflections of the functional integrity of sensory-motor systems, they are expected to reflect the abnormality in patients with disabilities and handicaps and also be in correlation with scales. This assumption was tested. Methods: Patients with multiple sclerosis (MS) and myelopathy (M) and normal controls were investigated by EP, Multiple Sclerosis …	Clinical Neurology and Neurosurgery	2015	Y
Kosa P., Ghazali D., Tanigawa M., Barbour C., Cortese I., Kelley W., Snyder B., Ohayon J., Fenton K., Lehky T., Wu T., Greenwood M., Nair G., Bielekova B.	Development of a sensitive outcome for economical drug screening for progressive multiple sclerosis treatment	Therapeutic advance in progressive multiple sclerosis (MS) has been very slow. Based on the transformative role magnetic resonance imaging (MRI) contrast-enhancing lesions had on drug development for relapsing-remitting MS, we consider the lack of sensitive outcomes to be the greatest barrier for developing new treatments for progressive MS. The purpose of this study was to compare 58 prospective…	Frontiers in Neurology	2016	N	No TMS
Lappin M.S., Lawrie F.W., Richards T.L., Kramer E.D.	Effects of a pulsed electromagnetic therapy on multiple sclerosis fatigue and quality of life: A double-blind, placebo controlled trial	Context: There is a growing literature on the biological and clinical effects of pulsed electromagnetic fields. Some studies suggest that electromagnetic therapies may be useful in the treatment of chronic illnesses. This study is a follow-up to a placebo controlled pilot study in which multiple sclerosis (MS) patients exposed to weak, extremely low frequency pulsed electromagnetic fields showed …	Alternative Therapies in Health and Medicine	2003	N	No TMS
Lascano, AM; Lalive, PH; Hardmeier, M; Fuhr, P; Seeck, M	Clinical evoked potentials in neurology: a review of techniques and indications	Evoked potentials (EPs) are a powerful and cost-effective tool for evaluating the integrity and function of the central nervous system. Although imaging techniques, such as MRI, have recently become increasingly important in the diagnosis of neurological diseases, over the past 30 years, many neurologists have continued to employ EPs in specific clinical applications. This review presents an over…	JOURNAL OF NEUROLOGY NEUROSURGERY AND PSYCHIATRY	2017	Y
Lefaucheur J.-P., Aleman A., Baeken C., Benninger D.H., Brunelin J., Di Lazzaro V., Filipovi? S.R., Grefkes C., Hasan A., Hummel F.C., Jääskeläinen S.K., Langguth B., Leocani L., Londero A., Nardone R., Nguyen J.-P., Nyffeler T., Oliveira-Maia A.J., Oliviero A., Padberg F., Palm U., Paulus W., Poulet E., Quartarone A., Rachid F., Rektorová I., Rossi S., Sahlsten H., Schecklmann M., Szekely D., Zi…	Evidence-based guidelines on the therapeutic use of repetitive transcranial magnetic stimulation (rTMS): An update (2014–2018)	A group of European experts reappraised the guidelines on the therapeutic efficacy of repetitive transcranial magnetic stimulation (rTMS) previously published in 2014 [Lefaucheur et al., Clin Neurophysiol 2014;125:2150-206]. These updated recommendations take into account all rTMS publications, including data prior to 2014, as well as currently reviewed literature until the end of 2018. Level A e…	Clinical Neurophysiology	2020	Y
Leocani L.	Clinical neurophysiology of multiple sclerosis		Handbook of Clinical Neurology	2014	N	Not original research
Leocani L., Comi G.	Electrophysiological assessment in multiple sclerosis		Multiple Sclerosis: Recovery of Function and Neurorehabilitation	2010	N	Not original research
Leocani L., Rocca M.A., Comi G.	MRI and neurophysiological measures to predict course, disability and treatment response in multiple sclerosis	Purpose of review: The expanding portfolio for multiple sclerosis treatment, together with the consensus that neurodegenerative processes occur since the early disease phases, has increased the need for paraclinical tests with prognostic value on disease evolution and treatment response. Recent findings: On the one hand, we face the development of MRI technology, from lesion detection, to global …	Current Opinion in Neurology	2016	Y
León Ruiz M, Sospedra M, Arce Arce S, Tejeiro-Martínez J, Benito-León J.	Current evidence on the potential therapeutic applications of transcranial magnetic stimulation in multiple sclerosis: A systematic review of the literature	Introduction: A growing number of studies have evaluated the effects of transcranial magnetic stimulation (TMS) for the symptomatic treatment of multiple sclerosis (MS). Methods: We performed a PubMed search for articles, recent books, and recommendations from the most relevant clinical practice guidelines and scientific societies regarding the use of TMS as symptomatic treatment in MS. Conclusio…	Neurologia (Engl Ed)	2018	Y
Magnin E.	What Are the Minimal Detectable Changes in SDMT and Verbal Fluency Tests for Assessing Changes in Cognitive Performance in Persons with Multiple Sclerosis and Non-Multiple Sclerosis Controls?	Introduction: Cognitive impairment is frequent in persons with multiple sclerosis (PwMS) and can impact on activities of daily living. The capacity to differentiate real changes from background statistical noise induced by human, instrumentational, and environmental variations inherent to the evaluation would improve cognitive assessments. Objective: To assess the short-term reproducibility of co…	European Neurology	2020	N	No TMS
Mancini A., Ghiglieri V., Parnetti L., Calabresi P., Di Filippo M.	Neuro-Immune Cross-Talk in the Striatum: From Basal Ganglia Physiology to Circuit Dysfunction	The basal ganglia network is represented by an interconnected group of subcortical nuclei traditionally thought to play a crucial role in motor learning and movement execution. During the last decades, knowledge about basal ganglia physiology significantly evolved and this network is now considered as a key regulator of important cognitive and emotional processes. Accordingly, the disruption of b…	Frontiers in Immunology	2021	N	Not original research
Manogaran P.	Assessing conductivity in the cortical-spinal pathway using motor evoked potentials in multiple sclerosis and neuromyelitis optica patients		Neurology	2013	N	Conference
Manogaran P.	Corticospinal tract integrity measured using transcranial magnetic stimulation and magnetic resonance imaging in neuromyelitis optica and multiple sclerosis	Background: Both multiple sclerosis (MS) and neuromyelitis optica (NMO) can present with transverse myelitis; however, NMO symptoms are usually more severe and may present with more extensive axonal loss. Transcranial magnetic stimulation (TMS)-based input–output recruitment curves can quantitatively assess the excitability of corticospinal tract pathways and myelin water imaging can quantify the…	Multiple Sclerosis Journal	2016	Y
Marion S.	Effects of modified-release fampridine on upper limb impairment in patients with Multiple Sclerosis	Background: Modified-release 4-aminopyridine (fampridine-MR) is used in the symptomatic treatment of walking disability in patients with multiple sclerosis (MS). Its potential for use in other MS symptoms remains unproven and its mode of action in this context is uncertain. Interest is growing in the use of upper limb outcome measures in clinical trials in patients with Multiple Sclerosis, partic…	Multiple Sclerosis and Related Disorders	2020	Y
Mathis, J; Hess, CW	Motor-evoked potentials from multiple target muscles in multiple sclerosis and cervical myelopathy	Motor-evoked potentials (MEP) from abductor digiti minimi (ADM), biceps brachii (BB) and tibialis anterior (TA) muscle were analysed in 101 patients with multiple sclerosis (MS) and in 72 patients with compressive cervical myelopathy (CM). In definite MS the results were abnormal in 82% and in probable or possible MS in 64% of patients. In CM results were abnormal in 56% when the compression site…	EUROPEAN JOURNAL OF NEUROLOGY	1996	Y
Miscio G, Guastamacchia G, Priano L, Baudo S, Mauro A.	Are the neurophysiological techniques useful for the diagnosis of diaphragmatic impairment in multiple sclerosis (MS)?	Objective: To characterize cortico-diaphragmatic pathway involvement in multiple sclerosis (MS) by means of transcranial magnetic stimulation (TMS), and verify its clinical impact. Methods: TMS from diaphragm (Dia), and abductor digiti minimi (AbdV degrees ) was performed in 26 MS patients. Phrenic nerve (PN) conduction study was also performed. Expanded disability status scale (EDSS) and fatigue…	Clin Neurophysiol	2003	Y
Mori F, Nisticò R, Mandolesi G, Piccinin S, Mango D, Kusayanagi H, Berretta N, Bergami A, Gentile A, Musella A, Nicoletti CG, Nicoletti F, Buttari F, Mercuri NB, Martino G, Furlan R, Centonze D.	Interleukin-1? promotes long-term potentiation in patients with multiple sclerosis	The immune system shapes synaptic transmission and plasticity in experimental autoimmune encephalomyelitis (EAE), the mouse model of multiple sclerosis (MS). These synaptic adaptations are believed to drive recovery of function after brain lesions, and also learning and memory deficits and excitotoxic neurodegeneration; whether inflammation influences synaptic plasticity in MS patients is less cl…	Neuromolecular Med	2014	Y
Mori F.	Cortical plasticity predicts recovery from relapse in multiple sclerosis	Background: Relapsing–remitting multiple sclerosis (RRMS) is characterized by the occurrence of clinical relapses, followed by remitting phases of a neurological deficit. Clinical remission after a relapse can be complete, with a return to baseline function that was present before, but is sometimes only partial or absent. Remyelination and repair of the neuronal damage do contribute to recovery, …	Multiple Sclerosis Journal	2014	Y
Morris G., Berk M., Puri B.K.	A Comparison of Neuroimaging Abnormalities in Multiple Sclerosis, Major Depression and Chronic Fatigue Syndrome (Myalgic Encephalomyelitis): is There a Common Cause?		Molecular Neurobiology	2018	N	No TMS
Nantes J.C.	Intracortical inhibition in multiple sclerosis: Relation to clinical subtype, motor disability, and cortical damage		Multiple Sclerosis Journal	2015	N	Conference
Nantes J.C., Proulx S., Zhong J., Holmes S.A., Narayanan S., Brown R.A., Hoge R.D., Koski L.	GABA and glutamate levels correlate with MTR and clinical disability: Insights from multiple sclerosis	Converging areas of research have implicated glutamate and γ-aminobutyric acid (GABA) as key players in neuronal signalling and other central functions. Further research is needed, however, to identify microstructural and behavioral links to regional variability in levels of these neurometabolites, particularly in the presence of demyelinating disease. Thus, we sought to investigate the extent to…	NeuroImage	2017	N	No TMS
Nantes J.C., Zhong J., Holmes S.A., Whatley B., Narayanan S., Lapierre Y., Arnold D.L., Koski L.	Intracortical inhibition abnormality during the remission phase of multiple sclerosis is related to upper limb dexterity and lesions	Objective: The impact of inhibitory cortical activity on motor impairment of people with relapsing-remitting multiple sclerosis (RRMS) has not been fully elucidated despite its relevance to neurorehabilitation. The present study assessed the extent to which transcranial magnetic stimulation (TMS)-based metrics of intracortical inhibition are related to motor disability and brain damage. Methods: …	Clinical Neurophysiology	2016	Y
Naser Moghadasi A.	Neural implant for the treatment of multiple sclerosis	The methods used to treat various neurological diseases are evolving. The facilities provided by the technology have led to creation of new treatment opportunities. Neuromodulation is one of these important methods. By definition, the neuromodulation is a change in neural activity which occurs by stimulating a specific area of nervous system. The mentioned stimulation can be electrical, magnetic,…	Med Hypotheses	2020	N	Not original research
Nasios G., Messinis L., Dardiotis E., Papathanasopoulos P.	Repetitive Transcranial Magnetic Stimulation, Cognition, and Multiple Sclerosis: An Overview	Multiple sclerosis (MS) affects cognition in the majority of patients. A major aspect of the disease is brain volume loss (BVL), present in all phases and types (relapsing and progressive) of the disease and linked to both motor and cognitive disabilities. Due to the lack of effective pharmacological treatments for cognition, cognitive rehabilitation and other nonpharmacological interventions suc…	Behavioural Neurology	2018	N	Not original research
Neva J.L., Lakhani B., Brown K.E., Wadden K.P., Mang C.S., Ledwell N.H.M., Borich M.R., Vavasour I.M., Laule C., Traboulsee A.L., MacKay A.L., Boyd L.A.	Multiple measures of corticospinal excitability are associated with clinical features of multiple sclerosis	In individuals with multiple sclerosis (MS), transcranial magnetic stimulation (TMS) may be employed to assess the integrity of corticospinal system and provides a potential surrogate biomarker of disability. The purpose of this study was to provide a comprehensive examination of the relationship between multiple measures corticospinal excitability and clinical disability in MS (expanded disabili…	Behavioural Brain Research	2016	Y
Nicoletti C.G., et al.	Treatment with dimethyl fumarate enhances cholinergic transmission in multiple sclerosis	Background: Dimethyl fumarate (DMF) exerts anti-inflammatory effects in multiple sclerosis by activating the Nrf2 antioxidant pathway, which is also stimulated by acetylcholine via alpha-7 nicotinic acetylcholine receptors. In animal models, Nrf2 potentiates cholinergic synaptic plasticity. Objective: The aim of this study was to test whether treatment with DMF modulates cholinergic pathways in r…	CNS Drugs	2019	Y
Nuwer M.R.	Evoked potentials		Handbook of Multiple Sclerosis, Fourth Edition	2006	N	Not original research
Oertel F.C., Zimmermann H.G., Brandt A.U., Paul F.	Novel uses of retinal imaging with optical coherence tomography in multiple sclerosis	Introduction: Multiple Sclerosis (MS) is the most common chronic autoimmune neuroinflammatory condition in young adults. It is often accompanied by optic neuritis (ON) and retinal neuro-axonal damage causing visual disturbances. Optical coherence tomography (OCT) is a sensitive non-invasive method for quantifying intraretinal layer volumes. Recently, OCT not only showed to be a reliable marker fo…	Expert Review of Neurotherapeutics	2019	N	No TMS
Pallix-Guyot, M; Guennoc, AM; Blasco, H; de Toffol, B; Corcia, P; Praline, J	Predictive value of motor evoked potentials in clinically isolated syndrome	Objectives: To assess the predictive role of several measures obtained by transcranial magnetic stimulation (TMS) in patients with clinically isolated syndrome (CIS) for the risk of conversion to multiple sclerosis (MS) during the first 2 years. Materials and methods: We investigated 34 patients with CIS. After 2 years of follow-up and classification into two groups according to MS diagnosis, ini…	ACTA NEUROLOGICA SCANDINAVICA	2011	Y
Pisa M.	Dexterity impairment in progressive MS is related to intracortical motor conduction slowing		Multiple Sclerosis Journal	2019	N	Conference
Pisa M.	Intracortical motor conduction is associated with hand dexterity in progressive multiple sclerosis	Background: Hand dexterity dysfunction is a key feature of disability in people with progressive multiple sclerosis (PMS). It underlies corticospinal tract (CST) and cerebellar integrity, as well as disruption of cortical networks, which are hardly assessed by standard techniques. Transcranial magnetic stimulation is a promising tool for evaluating the integrity of intracortical motor pathways. O…	Multiple Sclerosis Journal	2021	Y
Radetz A.	Dissecting task-specific plasticity capacity in patients with multiple sclerosis with transcranial magnetic stimulation		Clinical Neurophysiology	2020	N	Not original research
Radetz A.	Linking Microstructural Integrity and Motor Cortex Excitability in Multiple Sclerosis	Motor skills are frequently impaired in multiple sclerosis (MS) patients following grey and white matter damage with cortical excitability abnormalities. We applied advanced diffusion imaging with 3T magnetic resonance tomography for neurite orientation dispersion and density imaging (NODDI), as well as diffusion tensor imaging (DTI) in 50 MS patients and 49 age-matched healthy controls to quanti…	Frontiers in Immunology	2021	Y
Rico, A; Audoin, B; Franques, J; Eusebio, A; Reuter, F; Malikova, I; Cherif, AA; Pouget, J; Pelletier, J; Attarian, S	Motor evoked potentials in clinically isolated syndrome suggestive of multiple sclerosis	The aim of the present study was to determine the sensitivity and the profile of motor evoked potentials (MEP) in patients with clinically isolated syndrome (CIS) suggestive of multiple sclerosis (MS). We measured the central motor conduction time (CMCT), amplitude ratio (AR), and surface ratio (SR) in tibialis anterior and first dorsal interosseous muscles in 22 patients with CIS. In 12 patients…	Multiple Sclerosis Journal	2009	Y
Röricht S.	Responses of single motor units in relaxed hand muscles following magnetic motor cortex stimulation in patients with multiple sclerosis		EEG-EMG Zeitschrift fur Elektroenzephalographie Elektromyographie und Verwandte Gebiete (1997) 28:3 (130-135). Date of Publication: 1997	1997	N	Not English
Rosler, KM; Magistris, MR	The triple stimulation technique		KLINISCHE NEUROPHYSIOLOGIE	2005	N	Not English
Ross C.L., Harrison B.S.	The use of magnetic field for the reduction of inflammation: A review of the history and therapeutic results	Interest in magnetic field (MF) therapy has increased rapidly in recent years as research shows that this noninvasive, cost-effective modality might be safer than drugs and surgical procedures for reduction of inflammation. Inflammation is a signal-mediated response to tissue invasion by pathogens or toxins or to injury or physical stresses. The immune response plays a pivotal role in reaction to…	Alternative Therapies in Health and Medicine	2013	N	No TMS
Rossi S, Mancino R, Bergami A, Mori F, Castelli M, De Chiara V, Studer V, Mataluni G, Sancesario G, Parisi V, Kusayanagi H, Bernardi G, Nucci C, Bernardini S, Martino G, Furlan R, Centonze D.	Potential role of IL-13 in neuroprotection and cortical excitability regulation in multiple sclerosis	Background: Inflammation triggers secondary neurodegeneration in multiple sclerosis (MS). Objectives: It is unclear whether classical anti-inflammatory cytokines have the potential to interfere with synaptic transmission and neuronal survival in MS. Methods: Correlation analyses between cerebrospinal fluid (CSF) contents of anti-inflammatory cytokines and molecular, imaging, clinical, and neuroph…	Multiple Sclerosis Journal	2011	Y
Rossi S., Hallett M., Rossini P.M., Pascual-Leone A., Avanzini G., Bestmann S., Berardelli A., Brewer C., Canli T., Cantello R., Chen R., Classen J., Demitrack M., Di Lazzaro V., Epstein C.M., George M.S., Fregni F., Ilmoniemi R., Jalinous R., Karp B., Lefaucheur J.-P., Lisanby S., Meunier S., Miniussi C., Miranda P., Padberg F., Paulus W., Peterchev A., Porteri C., Provost M., Quartarone A., Rot…	Safety, ethical considerations, and application guidelines for the use of transcranial magnetic stimulation in clinical practice and research	This article is based on a consensus conference, which took place in Certosa di Pontignano, Siena (Italy) on March 7-9, 2008, intended to update the previous safety guidelines for the application of transcranial magnetic stimulation (TMS) in research and clinical settings. Over the past decade the scientific and medical community has had the opportunity to evaluate the safety record of research s…	Clinical Neurophysiology	2009	Y
Rossi, S; Studer, V; Moscatelli, A; Motta, C; Coghe, G; Fenu, G; Caillier, S; Buttari, F; Mori, F; Barbieri, F; Castelli, M; De Chiara, V; Monteleone, F; Mancino, R; Bernardi, G; Baranzini, SE; Marrosu, MG; Oksenberg, JR; Centonze, D	Opposite Roles of NMDA Receptors in Relapsing and Primary Progressive Multiple Sclerosis	Synaptic transmission and plasticity mediated by NMDA receptors (NMDARs) could modulate the severity of multiple sclerosis (MS). Here the role of NMDARs in MS was first explored in 691 subjects carrying specific allelic variants of the NR1 subunit gene or of the NR2B subunit gene of this glutamate receptor. The analysis was replicated for significant SNPs in an independent sample of 1548 MS subje…	PLoS ONE	2013	N	No TMS
Rossini P.M., Burke D., Chen R., Cohen L.G., Daskalakis Z., Di Iorio R., Di Lazzaro V., Ferreri F., Fitzgerald P.B., George M.S., Hallett M., Lefaucheur J.P., Langguth B., Matsumoto H., Miniussi C., Nitsche M.A., Pascual-Leone A., Paulus W., Rossi S., Rothwell J.C., Siebner H.R., Ugawa Y., Walsh V., Ziemann U.	Non-invasive electrical and magnetic stimulation of the brain, spinal cord, roots and peripheral nerves: Basic principles and procedures for routine clinical and research application: An updated report from an I.F.C.N. Committee	These guidelines provide an up-date of previous IFCN report on "Non-invasive electrical and magnetic stimulation of the brain, spinal cord and roots: basic principles and procedures for routine clinical application" (Rossini et al., 1994). A new Committee, composed of international experts, some of whom were in the panel of the 1994 "Report", was selected to produce a current state-of-the-art rev…	Clinical Neurophysiology	2015	Y
Russo M, Naro A, Leo A, Sessa E, D'Aleo G, Bramanti P, Calabrò RS.	Evaluating Sativex® in Neuropathic Pain Management: A Clinical and Neurophysiological Assessment in Multiple Sclerosis	Objective: The aim of our study was to better investigate the role of Sativex(®) in improving pain in multiple sclerosis (MS) patients by means of either clinical or neurophysiological assessment. Setting: Pain is a common symptom of MS, affecting up to 70% of patients. Pain treatment is often unsatisfactory, although emerging drugs (including cannabinoids) are giving encouraging results. Clinica…	Pain Med	2016	Y
Russo, M; Calabro, RS; Naro, A; Sessa, E; Rifici, C; D'Aleo, G; Leo, A; De Luca, R; Quartarone, A; Bramanti, P	Sativex in the Management of Multiple Sclerosis-Related Spasticity: Role of the Corticospinal Modulation	Sativex is an emergent treatment option for spasticity in patients affected by multiple sclerosis (MS). This oromucosal spray, acting as a partial agonist at cannabinoid receptors, may modulate the balance between excitatory and inhibitory neurotransmitters, leading to muscle relaxation that is in turn responsible for spasticity improvement. Nevertheless, since the clinical assessment may not be …	NEURAL PLASTICITY	2015	Y
Sahota P, Prabhakar S, Lal V, Khurana D, Das CP, Singh P.	Transcranial magnetic stimulation: role in the evaluation of disability in multiple sclerosis	Background: In patients with multiple sclerosis (MS), transcranial magnetic stimulation (TMS) has shown significant prolongation of central motor conduction time (CMCT). Abnormal CMCT may reflect sub-clinical involvement of motor pathways and correlate with clinical motor disability. Objective: To determine the diagnostic yield of TMS in MS and the possible correlation of TMS abnormalities with c…	Neurol India	2005	Y
Sandroff B.M.	Systematic Review on Exercise Training as a Neuroplasticity-Inducing Behavior in Multiple Sclerosis	Background. Exercise training is associated with functional improvements in persons with multiple sclerosis (MS), perhaps based on neuroplasticity. However, inferences regarding neuroplasticity require observations of exercise-related changes in the central nervous system that explain functional adaptations. This systematic review critically evaluated studies on exercise training, neuroimaging ou…	Neurorehabilitation and Neural Repair	2020	N	Not original research
Schlaeger R, Hardmeier M, Fuhr P.	Superficial brain stimulation in multiple sclerosis		Handb Clin Neurol	2013	N	Not original research
Schmierer K.	Conduction deficits of callosal fibres in early multiple sclerosis	Objective: To study the diagnostic usefulness of transcallosal inhibition (TI) elicited by transcranial magnetic stimulation (TMS) in detecting central conduction deficits in early multiple sclerosis. Corticospinally mediated excitatory responses evoked by TMS are accepted as a sensitive diagnostic tool in multiple sclerosis. Recently, TI evoked by TMS has been introduced as a new paradigm to tes…	Journal of Neurology Neurosurgery and Psychiatry	2000	Y
Schmierer, K; Roricht, S; Niehaus, L; Meyer, BU	Impaired transcallosal inhibition: an early indicator of central conduction deficits in multiple sclerosis		9TH EUROPEAN CONGRESS OF CLINICAL NEUROPHYSIOLOGY	1998	N	Conference
Sellebjerg F.	Methylprednisolone treatment, immune activation, and intrathecal inflammation in multiple sclerosis		Danish Medical Bulletin	2004	N	No TMS
Shehata H.	Effects of high frequency repetitive transcranial magnetic stimulation on gait and balance in patients with relapsing remitting multiple sclerosis		Multiple Sclerosis Journal	2017	N	Conference
Simpson M.	The Effects of modified-release fampridine on upper limb impairment in multiple sclerosis		Multiple Sclerosis Journal	2016	N	Conference
Simpson M.	The fampridine upper limb study: Baseline clinical and electrophysiological data	Aim To describe initial clinical and electrophysiological results from the Fampridine Upper Limb Study, conducted in patients with Multiple Sclerosis (MS) and upper limb impairment. Methods This randomised, double-blinded placebo controlled trial of modified-release fampridine comprises three groups: patients on drug, patients on placebo and healthy controls. Baseline assessments conducted prior …	Clinical Neurophysiology	2016	Y
Simpson M., Macdonell R.	The use of transcranial magnetic stimulation in diagnosis, prognostication and treatment evaluation in multiple sclerosis	Despite advances in brain imaging which have revolutionised the diagnosis and monitoring of patients with Multiple Sclerosis (MS), current imaging techniques have limitations, including poor correlation with clinical disability and prognosis. There is growing evidence that electrophysiological techniques may provide complementary functional information which can aid in diagnosis, prognostication …	Multiple Sclerosis and Related Disorders	2015	Y
Snow N.J., Wadden K.P., Chaves A.R., Ploughman M.	Transcranial Magnetic Stimulation as a Potential Biomarker in Multiple Sclerosis: A Systematic Review with Recommendations for Future Research	Multiple sclerosis (MS) is a demyelinating disorder of the central nervous system. Disease progression is variable and unpredictable, warranting the development of biomarkers of disease status. Transcranial magnetic stimulation (TMS) is a noninvasive method used to study the human motor system, which has shown potential in MS research. However, few reviews have summarized the use of TMS combined …	Neural Plasticity	2019	Y
Stampanoni Bassi M, Buttari F, Gilio L, De Paolis N, Fresegna D, Centonze D, Iezzi E.	Inflammation and Corticospinal Functioning in Multiple Sclerosis: A TMS Perspective	Transcranial magnetic stimulation (TMS) has been employed in multiple sclerosis (MS) to assess the integrity of the corticospinal tract and the corpus callosum and to explore some physiological properties of the motor cortex. Specific alterations of TMS measures have been strongly associated to different pathophysiological mechanisms, particularly to demyelination and neuronal loss. Moreover, TMS…	Front Neurol	2020	N	Not original research
Stampanoni Bassi M, Buttari F, Nicoletti CG, Mori F, Gilio L, Simonelli I, De Paolis N, Marfia GA, Furlan R, Finardi A, Centonze D, Iezzi E.	Interleukin-1β Alters Hebbian Synaptic Plasticity in Multiple Sclerosis	In multiple sclerosis (MS), inflammation alters synaptic transmission and plasticity, negatively influencing the disease course. In the present study, we aimed to explore the influence of the proinflammatory cytokine IL-1β on peculiar features of associative Hebbian synaptic plasticity, such as input specificity, using the paired associative stimulation (PAS). In 33 relapsing remitting-MS patient…	Int J Mol Sci	2020	Y
Stampanoni Bassi M, Mori F, Buttari F, Marfia GA, Sancesario A, Centonze D, Iezzi E.	Neurophysiology of synaptic functioning in multiple sclerosis	Multiple sclerosis (MS) is an inflammatory immune-mediate disorder of the central nervous system (CNS), primarily affecting the myelin sheath and followed by neurodegeneration. Synaptic alterations are emerging as critical determinants of early neurodegeneration in MS. Inflammation-induced alterations of synaptic transmission and plasticity have been investigated in vitro and also in human MS usi…	Clin Neurophysiol	2017	N	Not original research
Stampanoni Bassi M.	Age at Disease Onset Associates With Oxidative Stress, Neuroinflammation, and Impaired Synaptic Plasticity in Relapsing-Remitting Multiple Sclerosis	Age at onset is the main risk factor for disease progression in patients with relapsing-remitting multiple sclerosis (RR-MS). In this cross-sectional study, we explored whether older age is associated with specific disease features involved in the progression independent of relapse activity (PIRA). In 266 patients with RR-MS, the associations between age at onset, clinical characteristics, cerebr…	Frontiers in Aging Neuroscience	2021	Y
Stampanoni Bassi M.	Can pharmacological manipulation of LTP favor the effects of motor rehabilitation in multiple sclerosis?	Background: Synaptic plasticity, the basic mechanism of clinical recovery after brain lesion, can also remarkably influence the clinical course of multiple sclerosis (MS). Physical rehabilitation represents the main treatment option to promote synaptic long-term potentiation (LTP) and to enhance spontaneous recovery of neurological deficits. Objectives: To overview the role of pharmacological tre…	Multiple Sclerosis Journal	2018	N	Not original research
Stamponi Bassi M., Iezzi E., Pavone L., Mandolesi G., Musella A., Gentile A., Gilio L., Centonze D., Buttari F.	Modeling resilience to damage in multiple sclerosis: Plasticity meets connectivity	Multiple sclerosis (MS) is a chronic inflammatory disease of the central nervous system (CNS) characterized by demyelinating white matter lesions and neurodegeneration, with a variable clinical course. Brain network architecture provides efficient information processing and resilience to damage. The peculiar organization characterized by a low number of highly connected nodes (hubs) confers high …	International Journal of Molecular Sciences	2020	N	Not original research
Stamponi Bassi, M; Gilio, L; Buttari, F; Maffei, P; Marfia, GA; Restivo, DA; Centonze, D; Lezzi, E	Remodeling Functional Connectivity in Multiple Sclerosis: A Challenging Therapeutic Approach	Neurons in the central nervous system are organized in functional units interconnected to form complex networks. Acute and chronic brain damage disrupts brain connectivity producing neurological signs and/or symptoms. In several neurological diseases, particularly in Multiple Sclerosis (MS), structural imaging studies cannot always demonstrate a clear association between lesion site and clinical …	FRONTIERS IN NEUROSCIENCE	2017	N	Not original research
Vucic S.	Cortical dysfunction in progressive forms of multiple sclerosisdeveloping a biomarker of disease severity	Multiple sclerosis (MS) has been traditionally regarded as a primary demyelinating disorder of the central nervous system. Recently, pathological and radiological studies (using directed MRI sequences) have reported on the importance of grey matter atrophy in the development of long-term disability and thereby the evolution to progressive forms of MS. Pathological and radiological studies do not …	Journal of Clinical Neuroscience	2009	Y
Swanson, CW; Proessl, F; Stephens, JA; Miravalle, AA; Fling, BW	Non-invasive brain stimulation to assess neurophysiologic underpinnings of lower limb motor impairment in multiple sclerosis	Background: Multiple sclerosis (MS) is a neuroinflammatory disease resulting in axonal demyelination and an amalgamation of symptoms which commonly result in decreased quality of life due to mobility dysfunction and limited participation in meaningful activities. New method: The use of non-invasive brain stimulation (NIBS) techniques, specifically transcranial magnetic and transcranial direct cur…	JOURNAL OF NEUROSCIENCE METHODS	2021	Y
Taraoglu, C; Genc, A; Idiman, E; Cakmur, R; Idiman, F	Cortical silent period and motor evoked potentials in patients with multiple sclerosis	In order to determine the importance of central motor conduction time (CMCT) and silent period (SP) in patients with multiple sclerosis (MS), we enrolled this clinical and electrophysiological study. Additionally, we planned to compare the correlation between electrophysiological findings and clinical status. We examined 58 patients with definite MS and 31 controls. Patients were classified as re…	CLINICAL NEUROLOGY AND NEUROSURGERY	2003	Y
Tran K., Shi Z., Karmonik C., John B., Rajab H., Helekar S.A., Boone T., Khavari R.	Therapeutic effects of non-invasive, individualized, transcranial neuromodulation treatment for voiding dysfunction in multiple sclerosis patients: study protocol for a pilot clinical trial	Background: Voiding dysfunction (VD) is a common neurogenic lower urinary tract dysfunction (NLUTD) in multiple sclerosis (MS) patients. Currently, the only effective management for VD and urinary retention in MS patients is catheterization, prompting us to look for novel therapeutic options beyond the bladder, such as the brain. Transcranial rotating permanent magnet stimulator (TRPMS) is a non-…	Pilot and Feasibility Studies	2021	N	Not original research
Urban P.P.	Transcranial magnetic stimulation: Role in the evaluation of disability in multiple sclerosis - Commentary		Neurology India	2005	N	Not original research
Veauthier C., Paul F.	Multiple Sclerosis		Handbook of Sleep Disorders in Medical Conditions	2019	N	Not original research
Vucic S.	Cortical dysfunction in multiple sclerosis-developing a biomarker of disease severity		Multiple Sclerosis Journal	2009	N	Conference
Zieli?ska-Nowak E., W?odarczyk L., Kostka J., Miller E.?.B.	New strategies for rehabilitation and pharmacological treatment of fatigue syndrome in multiple sclerosis	Multiple sclerosis (MS) is the most common autoimmune disease of the central nervous system (CNS), with an inflammatory demyelinating basis and a progressive course. The course of the disease is very diverse and unpredictable. Patients face many problems on a daily basis, such as problems with vision; sensory, balance, and gait disturbances; pain; muscle weakness; spasticity; tremor; urinary and …	Journal of Clinical Medicine	2020	N	Not original research
Ziemann U., Wahl M., Hattingen E., Tumani H.	Development of biomarkers for multiple sclerosis as a neurodegenerative disorder	Multiple sclerosis (MS) is the most common neurological disorder leading to permanent disability in young adults in the developed world. While traditionally conceived as an autoimmune inflammatory disease it is becoming increasingly evident that axonal and neuronal degeneration occur, at least partly independent of inflammation, and already at the earliest stages of the disease. In addition, it i…	Progress in Neurobiology	2011	Y
Zipser C.M.	TEP propagation in early RRMS patients and controls; A TMS-EEG study		Klinische Neurophysiologie	2013	N	Not English

## Sheet: Full-text Review
Authors	Title	Abstract	Journal	Year	Verdict	Rationale	Combined EP scores	Conference	Mixed disease etiologies	No diagnostic classification	No TMS	Not English	Not MS	Not original research	Sample size < 40	Unable to find full text	TES and TMS
Canham LJW et al	Multimodal neurophysiological evaluation of primary progressive multiple sclerosis - An increasingly valid biomarker, with limits	Background: The promising utility of multi-modality evoked potential batteries to objectively measure multi-tract dysfunction has been evaluated by several groups using different methods. Objective: To independently evaluate the use of multi-modality evoked potential batteries as surrogate biomarkers for both physical and cognitive status in a cohort of Primary Progressive Multiple Sclerosis pati…	Multiple Sclerosis and Related Disorders	2015	N	Combined EP scores only	14	3	6	66	18	1	3	16	27	2	2
Eisen A.A.	AAEM minimonograph #35: Clinical experience with transcranial magnetic stimulation	We elicited motor evoked potentials (MEPs) using transcortical magnetic stimulation in 150 control subjects aged 14 to 85 years and 275 patients with a variety of diseases. There were no significant side effects. Cortex-to-target muscle latencies measured 20.2 +/- 1.6 ms (thenar), 14.2 +/- 1.7 ms (extensor digitorum communis), 9.4 +/- 1.7 ms (biceps), and 27.2 +/- 2.9 ms (tibialis anterior). Cent…	Muscle and Nerve	1990	N	Combined EP scores only
Filippi M et al	Brain magnetic resonance imaging and multimodal evoked potentials in benign and secondary progressive multiple sclerosis	Brain MRI and multimodal evoked potentials (EPs) were obtained for 13 patients with benign multiple sclerosis and 13 patients with secondary progressive multiple sclerosis, matched for age and duration of the disease, to investigate the nature of the disability in multiple sclerosis. Patients with secondary progressive multiple sclerosis had significantly greater lesion loads for five of seven pe…	Journal of Neurology, Neurosurgery, & Psychiatry	1995	N	Combined EP scores only
Fuhr P et al	Visual and motor evoked potentials in the course of multiple sclerosis	While evoked potentials are sensitive tools for diagnosing multiple sclerosis, little is known about their prognostic value and their role in determining the course of the disease. To validate the visual and motor evoked potentials (VEP and MEP) as measures for the course of multiple sclerosis, we examined prospectively 30 patients with relapsing-remitting or secondary progressive multiple sclero…	Brain	2001	N	Combined EP scores only
Giffroy X et al	Multimodal evoked potentials for functional quantification and prognosis in multiple sclerosis	Background: Functional biomarkers able to identify multiple sclerosis (MS) patients at high risk of fast disability progression are lacking. The aim of this study was to evaluate the ability of multimodal (upper and lower limbs motor, visual, lower limbs somatosensory) evoked potentials (EP) to monitor disease course and identify patients exposed to unfavourable evolution. Methods: One hundred MS…	BMC Neurology	2016	N	Combined EP scores only
Giffroy X et al		The clinical variability and complexity of multiple sclerosis (MS) challenges the individual clinical course prognostication. This study aimed to find out whether multimodal evoked potentials (EP) correlate with the motor components of multiple sclerosis functional composite (MSFCm) and predict clinically relevant motor functional deterioration. One hundred MS patients were assessed at baseline (…	Acta Neurologica Belgica	2017	N	Combined EP scores only
Invernizzi P et al	Prognostic value of multimodal evoked potentials in multiple sclerosis: the EP score	Evoked potentials (EPs) have long been used as diagnostic tools in multiple sclerosis (MS), although their importance decreased as magnetic resonance imaging (MRI) became available. However, the prognostic value of EPs in MS has not been completely established. The aim of the study was to analyze the prognostic significance of EPs in a cohort of MS cases. From the Verona University Hospital MS Cl…	Journal of Neurology	2011	N	Combined EP scores only
Iodice R et al	Multimodal evoked potentials follow up in multiple sclerosis patients under fingolimod therapy	Background: Clinical trials have shown the therapeutic effect of fingolimod in reducing disease activity in relapsing-remitting multiple sclerosis (RR-MS), but its influence on nervous conduction assessed by evoked potentials (EPs) has not been previously investigated. Methods: EP data of 20 patients examined 12months prior to initiation of fingolimod (t=-1), at treatment initiation (t=0) and 1ye…	Journal of the Neurological Sciences	2016	N	Combined EP scores only
Margaritella N et al	Exploring the predictive value of the evoked potentials score in MS within an appropriate patient population: a hint for an early identification of benign MS?	Background: The prognostic value of evoked potentials (EPs) in multiple sclerosis (MS) has not been fully established. The correlations between the Expanded Disability Status Scale (EDSS) at First Neurological Evaluation (FNE) and the duration of the disease, as well as between EDSS and EPs, have influenced the outcome of most previous studies. To overcome this confounding relations, we propose t…	BMC Neurology	2012	N	Combined EP scores only
Meuth SG et al	Natalizumab restores evoked potential abnormalities in patients with relapsing-remitting multiple sclerosis	Background and objective: The objective of this study was to examine the effects of natalizumab on functional parameters assessed by evoked potentials (visual [VEP], somatosensory [SEP] and motor evoked potentials [MEP]) in a cohort study in relapsing-remitting multiple sclerosis patients. Methods: EP data of 44 patients examined 12 months prior to natalizumab treatment, at the timepoint of treat…	Multiple Sclerosis Journal	2011	N	Combined EP scores only
Schlaeger R et al	Monitoring multiple sclerosis by multimodal evoked potentials: Numerically versus ordinally scaled scoring systems	Objective: To compare the ability of different evoked potential scores (EPS) to monitor and predict the disease course in multiple sclerosis (MS). Methods: Seventy-two patients with MS or clinically isolated syndrome were investigated by visual, motor, and somatosensory EP and expanded disability status scale (EDSS) at baseline (T0) and months 6, 12, 24, 36 (T4). EP results were rated according t…	Multiple Sclerosis Journal	2016	N	Combined EP scores only
Schlaeger R et al	Combined visual and motor evoked potentials predict multiple sclerosis disability after 20 years	Background: The development of predictors of multiple sclerosis (MS) disability is difficult due to the complex interplay of pathophysiological and adaptive processes. Objective: The purpose of this study was to investigate whether combined evoked potential (EP)-measures allow prediction of MS disability after 20 years. Methods: We examined 28 patients with clinically definite MS according to Pos…	Multiple Sclerosis Journal	2014	N	Combined EP scores only
Schlaeger R et al	Electrophysiological markers and predictors of the disease course in primary progressive multiple sclerosis	Background: Currently no valid surrogate marker exists for primary progressive multiple sclerosis (PPMS). Objective: Our aim was to prospectively investigate multimodal evoked potentials (EPs) as markers and predictors of the disease course in PPMS. Methods: Twenty-two PPMS patients were prospectively examined with visual, somatosensory and motor EPs and Expanded Disability Status Scale (EDSS) as…	Multiple Sclerosis Journal	2014	N	Combined EP scores only
Schlaeger R et al	Prediction of long-term disability in multiple sclerosis	Background: Little is known about the predictive value of neurophysiological measures for the long-term course of multiple sclerosis (MS). Objective: To prospectively investigate whether combined visual (VEP) and motor evoked potentials (MEP) allow prediction of disability over 14 years. Methods: A total of 30 patients with relapsing-remitting and secondary progressive MS were prospectively inves…	Multiple Sclerosis Journal	2012	N	Combined EP scores only
Hofstadt-van Oy U.	Clinical isolated syndromes: Sensitivity to detect clinically silent lesions with the triple stimulation technique in comparison to transcranial magnetic stimulation and visual/somatosensory evoked potentials	OBJECTIVE: To compare the sensitivity of the triplestimulation technique (TST), visual (VEP) and somatosensory (SEP) evoked potentials and transcranial magnetic stimulation (TMS) and to detect conduction failure in patients with “clinical isolated syndromes” (CIS). BACKGROUND: Patients with CIS like optic neuritis, myelitis or cerebral inflammatory disease are at high risk to develop multiple scl…	Neurology	2013	N	Conference
Simpson M.	The fampridine upper limb study: Baseline clinical and electrophysiological data	Aim To describe initial clinical and electrophysiological results from the Fampridine Upper Limb Study, conducted in patients with Multiple Sclerosis (MS) and upper limb impairment. Methods This randomised, double-blinded placebo controlled trial of modified-release fampridine comprises three groups: patients on drug, patients on placebo and healthy controls. Baseline assessments conducted prior …	Clinical Neurophysiology	2016	N	Conference
Vucic S.	Cortical dysfunction in progressive forms of multiple sclerosisdeveloping a biomarker of disease severity	Multiple sclerosis (MS) has been traditionally regarded as a primary demyelinating disorder of the central nervous system. Recently, pathological and radiological studies (using directed MRI sequences) have reported on the importance of grey matter atrophy in the development of long-term disability and thereby the evolution to progressive forms of MS. Pathological and radiological studies do not …	Journal of Clinical Neuroscience	2009	N	Conference
Caramia MD, et al.	Excitability' changes of muscular responses to magnetic brain stimulation in patients with central motor disorders		Electroencephalography and Clinical Neurophysiology	1991	N	Mixed disease etiologies
Di Lazzaro V et al	Excitability of the motor cortex to magnetic stimulation in patients with cerebellar lesions	The excitability of the motor cortex to magnetic stimulation was evaluated in seven patients with cerebellar lesions (six patients with a unilateral lesion) and in 20 control subjects. Magnetic motor threshold was defined at rest. In all but one of the patients with a hemicerebellar lesion the threshold was higher in the motor cortex contralateral to the impaired hemicerebellum and the right/left…	Journal of Neurology, Neurosurgery and Psychiatry	1994	N	Mixed disease etiologies
Haug BA, Kukowski B.	Latency and duration of the muscle silent period following transcranial magnetic stimulation in multiple sclerosis, cerebral ischemia, and other upper motoneuron lesions	In muscles with sustained voluntary contraction, EMG activity is transiently inhibited after transcranial magnetic stimulation. We recorded this postexcitatory silent period (SP) at 1.5 times individual stimulus threshold level from the first dorsal interosseus muscle in 65 neurologic patients aged 11 to 80 years. When compared with 20 healthy volunteers and a subgroup of patients with peripheral…	Neurology	1994	N	Mixed disease etiologies
Hömberg V et al	Transcranial stimulation of motor cortex in upper motor neurone syndrome: its relation to the motor deficit	The purpose of this investigation was to clarify the functional significance of the fastest cortico-motoneuronal connections in chronic upper motor neurone syndromes. Using magneto-electrical stimulation of motor cortex the intactness of cortico-motoneuronal connections was assessed in 51 patients presenting with variable degrees of impairment. There was a gross correlation between clinical impai…	Electroencephalography and Clinical Neurophysiology	1991	N	Mixed disease etiologies
Linden D & Berlit P	Magnetic motor evoked potentials (MEP) in diseases of the spinal cord	Transcranial magnetic stimulation (TMS) is a non-invasive diagnostic method particularly suited to investigation of the long motor tracts. The clinical value of this method in many cortical and subcortical diseases has been well established, but comparable studies for most spinal cord diseases have still to be made. Forty patients in whom spinal cord disease was established by clinical examinatio…	Acta Neurologica Scandinavica	1994	N	Mixed disease etiologies
Thompson PD et al	The interpretation of electromyographic responses to electrical stimulation of the motor cortex in diseases of the upper motor neurone	The complexities of interpreting results of electrical stimulation of the motor cortex in pathological states are discussed and illustrated by reference to results from a variety of patients with diseases affecting the upper motor neurone (multiple sclerosis, cervical spondylosis and myelopathy, motor neurone disease, hemiparesis due to cerebral infarction, and hereditary spastic paraplegia). The…	Journal of the Neurological Sciences	1987	N	Mixed disease etiologies
Caramia MD et al	Neurophysiological evaluation of the central nervous impulse propagation in patients with sensorimotor disturbances	Motor evoked potentials (MEPs) to transcranial stimulation (TCS) and somatosensory evoked potentials to median nerve stimulation (MN-SEPs) were examined in 74 patients affected by multiple sclerosis (MS = 49 cases), amyotrophic lateral sclerosis (ALS = 9 cases), cervical cord lesions (7 cases), Parkinson's disease (PD = 5 cases), Huntington's chorea (HC = 2 cases), Wilson's disease (WD = 1 case),…	Electroencephalography and Clinical Neurophysiology	1988	N	Mixed TMS and TES results
Rossini PM et al	Sensory (VEP, BAEP, SEP) and motor-evoked potentials, liquoral and magnetic resonance findings in multiple sclerosis	In order to define the most suitable instrumental protocol for the diagnosis of multiple sclerosis (MS), 41 patients with definite (D = 14), probable (P = 14) and suspected (S = 13) MS were examined with CSF immunology, brain MRI and multimodal evoked potentials. The central motor tracts were also tested. The following alteration rates were found: MRI = 78%, CSF = 63.6%, VEP = 70.0%, median nerve…	European Neurology	1989	N	Mixed TMS and TES results
Ayache S et al	Relapses in multiple sclerosis: effects of high-dose steroids on cortical excitability	Background and purpose High-dose steroid administration is the usual treatment of multiple sclerosis (MS) relapse, but it remains to determine whether this treatment may act by changing the excitability of cortical circuitry. Methods The functional cortical effects of high-dose steroids in 21 MS patients before and after 3 days of intravenous administration of methylprednisolone (1 g/day) for the…	European Journal of Neurology	2014	N	No diagnostic classification
Balloff C, Penner IK, Ma M, Georgiades I, Scala L, Troullinakis N, Graf J, Kremer D, Aktas O, Hartung HP, Meuth SG, Schnitzler A, Groiss SJ, Albrecht P.	The degree of cortical plasticity correlates with cognitive performance in patients with Multiple Sclerosis	Background Cortical reorganization and plasticity may compensate for structural damage in Multiple Sclerosis (MS). It is important to establish sensitive methods to measure these compensatory mechanisms, as they may be of prognostic value. Objective To investigate the association between the degree of cortical plasticity and cognitive performance and to compare plasticity between MS patients and …	Brain Stimul	2022	N	No diagnostic classification
Bolbocean O.	Motor evoked potentials modification in different forms and stages of multiple sclerosis	Background: In patients with Multiple Sclerosis (MS), transcranial magnetic stimulation (TMS) has shown significant prolongation of central motor conduction time (CMCT). Abnormal CMCT may reflect sub-clinical involvement of motor pathways and correlate with clinical motor disability.The present study was undertaken to determine the diagnostic yield of TMS in MS, to assess the strength of the corr…	Romanian Journal of Neurology/ Revista Romana de Neurologie	2009	N	No diagnostic classification
Boniface SJ et al	Responses of single spinal motoneurons to magnetic brain stimulation in healthy subjects and patients with multiple sclerosis	Magnetic stimuli delivered over the scalp can cause single motor units to discharge in intrinsic hand muscles. The discharge characteristics of 26 tonically active, low threshold single motor units in the first dorsal interosseous muscle of 13 healthy subjects and of 21 motor units in 9 patients with multiple sclerosis (MS) were studied. Up to 500 transcranial magnetic stimuli were delivered at t…	Brain	1991	N	No diagnostic classification
Bridoux et al	Impaired sleep-associated modulation of post-exercise corticomotor depression in multiple sclerosis	Objective: To compare the beneficial effect of nap versus rest on the recovery of motor evoked potentials (MEPs) after a fatiguing exercise performed in patients with multiple sclerosis (MS) and healthy controls. Methods: In 12 MS patients and 12 healthy controls, MEPs were recorded from the adductor pollicis muscle before, 10 and 60 min (T0, T10, and T60) after an effort of thumb adduction at 25…	Journal of the Neurological Sciences	2015	N	No diagnostic classification
Centonze D et al	Repetitive transcranial magnetic stimulation of the motor cortex ameliorates spasticity in multiple sclerosis	Objective: To investigate whether repetitive transcranial magnetic stimulation (rTMS) can modify spasticity. Methods: We used high-frequency (5 Hz) and low-frequency (1 Hz) rTMS protocols in 19 remitting patients with relapsing-remitting multiple sclerosis and lower limb spasticity. Results: A single session of 1 Hz rTMS over the leg primary motor cortex increased H/M amplitude ratio of the soleu…	Neurology	2007	N	No diagnostic classification
Chaves, AR; Devasahayam, AJ; Riemenschneider, M; Pretty, RW; Ploughman, M	Walking Training Enhances Corticospinal Excitability in Progressive Multiple Sclerosis-A Pilot Study	Background: Inflammatory lesions and neurodegeneration lead to motor, cognitive, and sensory impairments in people with multiple sclerosis (MS). Accumulation of disability is at least partially due to diminished capacity for neuroplasticity within the central nervous system. Aerobic exercise is a potentially important intervention to enhance neuroplasticity since it causes upregulation of neurotr…	FRONTIERS IN NEUROLOGY	2020	N	No diagnostic classification
Codeca et al	Differential patterns of interhemispheric functional disconnection in mild and advanced multiple sclerosis	Background: Patients with multiple sclerosis may present altered patterns of connectivity between the two brain hemispheres. To date, only transcallosal connectivity between the two primary motor cortices (M1) has been investigated functionally in patients with multiple sclerosis. Objectives: The aim of this study was to investigate whether connectivity between the dorsal premotor cortex and the …	Multiple Sclerosis Journal	2010	N	No diagnostic classification
Conte et al	Attention-related changes in short-term cortical plasticity help to explain fatigue in multiple sclerosis	Background: In multiple sclerosis (MS), pathophysiology of fatigue is only partially known. Objective: The aim of this study was to investigate whether the attention-induced modulation on shortand long-term cortical plasticity mechanisms in primary motor area (M1) is abnormal in patients with MS-related fatigue. Methods: All participants underwent 5-Hz repetitive transcranial magnetic stimulation…	Multiple Sclerosis Journal	2016	N	No diagnostic classification
Conte et al	Intracortical excitability in patients with relapsing–remitting and secondary progressive multiple sclerosis	We designed this study to investigate possible correlations between variables measuring primary motor cortex excitability detected by single and paired-pulse transcranial magnetic stimulation (TMS) and the severity of clinical manifestations in patients with multiple sclerosis (MS). Thirty patients with MS in remission, 16 with relapsing–remitting (RR), 14 with secondary progressive disease (SP) …	Journal of Neurology	2009	N	No diagnostic classification
Créange A, Lefaucheur JP, Balleyguier MO, Galactéros F.	Iron depletion induced by bloodletting and followed by rhEPO administration as a therapeutic strategy in progressive multiple sclerosis: a pilot, open-label study with neurophysiological measurements	Objectives: To evaluate the concept that iron depletion (ID) induced by bloodletting and followed by recombinant human erythropoietin (rhEPO) administration could be a therapeutic strategy in progressive multiple sclerosis (PMS) and that it could be assessed by neurophysiological measurements. Patients and methods: In four patients with PMS, bloodletting was performed until ID was induced, and th…	Neurophysiol Clin	2013	N	No diagnostic classification
Elshehaby FGA, et al.	Brain Excitability Changes in the Relapsing and Remitting Phases of Multiple Sclerosis: A Study with Transcranial Magnetic Stimulation	Background: Multiple sclerosis (MS) is the most common disabling neurological disease in young adults characterized by recurrent relapses and/or progression. Multiple sclerosis was the first neurological disease in which transcranial magnetic stimulation (TMS) was used. Objective: The aim of this study is to assess the relationship between the level of cerebral excitability and clinical phase of …	Egyptian Journal of Neurology, Psychiatry, and Neurosurgery	2010	N	No diagnostic classification
Fujihara K & Miyoshi T	The effects of 4-aminopyridine on motor evoked potentials in multiple sclerosis	In order to study the effects of 4-aminopyridine (4-AP) on impulse conduction in multiple sclerosis (MS), we studied motor-evoked potentials (MEPs) in the upper (U/E) and lower extremities (L/E) of six MS patients with stable spastic paraparesis before and after intravenous administration of 4-AP. As a result, we found a significant increase in mean amplitudes in U/E and L/E (P = 0.008) and a sig…	Journal of the Neurological Sciences	1998	N	No diagnostic classification
Hardmeier M., Schindler C., Kuhle J., Fuhr P.	Validation of Quantitative Scores Derived From Motor Evoked Potentials in the Assessment of Primary Progressive Multiple Sclerosis: A Longitudinal Study	Objective: To evaluate the sensitivity to change of differently calculated quantitative scores from motor evoked potentials (MEP) in patients with primary progressive multiple sclerosis (PPMS). Methods: Twenty patients with PPMS had MEP to upper and lower limbs at baseline, years 1 and 2 measured in addition to clinical assessment [Expanded Disability Status Scale (EDSS), ambulation score]; a sub…	Frontiers in Neurology	2020	N	No diagnostic classification
Hulst H et al	rTMS affects working memory performance, brain activation and functional connectivity in patients with multiple sclerosis	Objective: To investigate the effects of high-frequency repetitive transcranial magnetic stimulation (rTMS) of the right dorsolateral prefrontal cortex (DLPFC) on working memory performance, while measuring task-related brain activation and task-related brain connectivity in patients with multiple sclerosis (MS). Methods: 17 patients with MS and 11 healthy controls (HCs) underwent 3 experimental …	Journal of Neurology, Neurosurgery, & Psychiatry	2017	N	No diagnostic classification
Humm AM et al	Quantification of central motor conduction deficits in multiple sclerosis patients before and after treatment of acute exacerbation by methylprednisolone	Objective To compare the effects of intravenous methylprednisolone (IVMP) in patients with relapsing‐remitting (RR‐MS), secondary progressive (SP‐MS), and primary progressive multiple sclerosis (PP‐MS). Methods Clinical and neurophysiological follow up was undertaken in 24 RR‐MS, eight SP‐MS, and nine PP‐MS patients receiving Solu‐Medrol 500 mg/d over five days for exacerbations involving the mot…	Journal of Neurology, Neurosurgery, & Psychiatry	2006	N	No diagnostic classification
Humm AM et al	Central motor conduction differs between acute relapsing-remitting and chronic progressive multiple sclerosis	Objective: To characterize central motor conduction in relation to the clinical deficits and to the disease duration in 90 patients with acute relapsing-remitting MS (RR-MS) and in 51 patients with chronic primary or secondary progressive MS (P-MS). Methods: The triple stimulation technique (TST) was used to quantify the central motor conduction failure (expressed by the TST amplitude ratio) and …	Clinical Neurophysiology	2003	N	No diagnostic classification
Kallmann BA, et al	Early abnormalities of evoked potentials and future disability in patients with multiple sclerosis	Evoked potentials (EP) have a role in making the diagnosis of multiple sclerosis (MS) but their implication for predicting the future disease course in MS is under debate. EP data of 94 MS patients examined at first presentation, and after five and ten years were retrospectively analysed. Patients were divided into two groups in relation to the prior duration of disease at the time point of first…	Multiple Sclerosis Journal	2006	N	No diagnostic classification
Kandler RH et al	The role of magnetic stimulation as a quantifier of motor disability in patients with multiple sclerosis	Magnetic stimulation was used to measure motor conduction time (MCT) between head and neck in a prospective longitudinal study of patients with multiple sclerosis (MS) and normal subjects. MCT measurements showed a high degree of reproducibility in normal subjects and patients with stable MS. In patients with definite MS, there was significant positive correlation between MCT and motor disability…	Journal of the Neurological Sciences	1991	N	No diagnostic classification
Kidd D, et al	Central motor conduction time in progressive multiple sclerosis. Correlations with MRI and disease activity	The purpose of this study was to relate abnormalities of motor conduction time to the presence of spinal cord MRI lesions in progressive multiple sclerosis and to investigate the relationship between changes in motor conduction over time and clinical and MRI changes. Central motor conduction time (CMCT), serial MRI of the brain and spinal cord, and clinical evaluations were carried out in 20 pati…	Brain	1998	N	No diagnostic classification
Korzhova J et al	High frequency repetitive transcranial magnetic stimulation and intermittent theta-burst stimulation for spasticity management in secondary progressive multiple sclerosis	Background and purpose: The spasticity phenomenon is a significant factor in the development of disability. Repetitive transcranial magnetic stimulation (rTMS) is a promising treatment method for this disorder. Our aim was to compare the effects of two protocols of rTMS – the high-frequency (HF) rTMS (20 Hz) and the intermittent theta-burst stimulation (iTBS) – on the level of spasticity and conc…	European Journal of Neurology	2018	N	No diagnostic classification
Landi D et al	Oral fingolimod reduces glutamate-mediated intracortical excitability in relapsing-remitting multiple sclerosis	Objective Fingolimod is an effective disease modifying therapy for multiple sclerosis (MS). Beyond its main action on peripheral lymphocytes, several noteworthy side effects have been demonstrated in vitro, among which modulation of neural excitability. Our aim was to explore cortical excitability in vivo in patients treated with fingolimod 0.5 mg/day. Methods Paired-pulse TMS was applied on the …	Clinical Neurophysiology	2015	N	No diagnostic classification
Lenzi et al	Effect of Corpus Callosum Damage on Ipsilateral Motor Activation in Patients with Multiple Sclerosis: A Functional and Anatomical Study	Abstract: Functional MRI (fMRI) studies have shown increased activation of ipsilateral motor areas during hand movement in patients with multiple sclerosis (MS). We hypothesized that these changes could be due to disruption of transcallosal inhibitory pathways. We studied 18 patients with relapsingremitting MS. Conventional T1- and T2-weighted images were acquired and lesion load (LL) measured. D…	Human Brain Mapping	2007	N	No diagnostic classification
Liepert J, et al	Central fatigue assessed by transcranial magnetic stimulation	Central fatigue is a subjective phenomenon which can be examined using transcranial magnetic stimulation (TMS). To assess central fatigue, we compared TMS and peripheral electrical stimulations in patients with central nervous system (CNS) lesions and controls before and after an exhaustive task. The recovery times of motor evoked potential (MEP) amplitudes were significantly prolonged in the pat…	Muscle and Nerve	1996	N	No diagnostic classification
Liepert J, et al	Motor cortex excitability and fatigue in multiple sclerosis: a transcranial magnetic stimulation study	We investigated electrophysiological correlates of fatigue in patients with multiple sclerosis (MS). Transcranial magnetic stimulation (TMS) was used to explore motor excitability in three groups of subjects: MS patients with fatigue (MS-F), MS patients without fatigue (MS-NF) and healthy control subjects. All participants had to perform a fatiguing hand-grip exercise. TMS was performed prior to …	Multiple Sclerosis Journal	2005	N	No diagnostic classification
Llufriu et al	Influence of Corpus Callosum Damage on Cognition and Physical Disability in Multiple Sclerosis: A Multimodal Study	Background: Corpus callosum (CC) is a common target for multiple sclerosis (MS) pathology. We investigated the influence of CC damage on physical disability and cognitive dysfunction using a multimodal approach. Methods: Twenty-one relapsing-remitting MS patients and 13 healthy controls underwent structural MRI and diffusion tensor of the CC (fractional anisotropy; mean diffusivity, MD; radial di…	PLoS ONE	2012	N	No diagnostic classification
Mainero C et al	Enhanced brain motor activity in patients with MS after a single dose of 3,4-diaminopyridine	Background: 3,4-diaminopyridine (3,4-DAP), a potassium (K+) channel blocker, improves fatigue and motor function in multiple sclerosis (MS). Although it was thought to do so by restoring conduction to demyelinated axons, recent experimental data show that aminopyridines administered at clinical doses potentiate synaptic transmission. Objective: To investigate motor cerebral activity with fMRI and…	Neurology	2004	N	No diagnostic classification
Manogaran P.	Corticospinal tract integrity measured using transcranial magnetic stimulation and magnetic resonance imaging in neuromyelitis optica and multiple sclerosis	Background: Both multiple sclerosis (MS) and neuromyelitis optica (NMO) can present with transverse myelitis; however, NMO symptoms are usually more severe and may present with more extensive axonal loss. Transcranial magnetic stimulation (TMS)-based input–output recruitment curves can quantitatively assess the excitability of corticospinal tract pathways and myelin water imaging can quantify the…	Multiple Sclerosis Journal	2016	N	No diagnostic classification
Manova MG et al	Clinico-electrophysiological correlates in patients with relapsing-remitting multiple sclerosis		Folia Medica	2001	N	No diagnostic classification
Morgante et al	Is central fatigue in multiple sclerosis a disorder of movement preparation?	We tested the hypothesis that fatigue in MS is related to a dysfunction in cortical areas involved in movement preparation. Thirty-three patients with clinically definite MS (16 with fatigue MS-F, 17 without fatigue MSNF) and a relapsing-remitting course, matched for disease severity and duration, disability scores and level of depression were enrolled. They underwent a combined assessment with m…	Journal of Neurology	2011	N	No diagnostic classification
Mori F et al	Short interval intracortical facilitation correlates with the degree of disability in multiple sclerosis	Background: The Expanded Disability Status Scale (EDSS) is the most widely used measure of disability in MS, however because of its limitations surrogate markers of clinical disability progression are of high interest. Transcranial magnetic stimulation (TMS) measures of demyelination and cortical excitability correlate with disability levels in MS. Objective: Aim of this study was testing whether…	Brain Stimulation	2013	N	No diagnostic classification
Mori F et al	Effects of intermittent theta burst stimulation on spasticity in patients with multiple sclerosis	Background and purpose: Spasticity is a common disorder and a major cause of longterm disability in patients with multiple sclerosis (MS). Our aim was to evaluate whether a recently developed repetitive transcranial magnetic stimulation protocol, the intermittent theta burst stimulation (iTBS) is effective in modulating lower limb spasticity in MS patients. Methods: Twenty MS patients were pseudo…	European Journal of Neurology	2010	N	No diagnostic classification
Mori F, Nisticò R, Mandolesi G, Piccinin S, Mango D, Kusayanagi H, Berretta N, Bergami A, Gentile A, Musella A, Nicoletti CG, Nicoletti F, Buttari F, Mercuri NB, Martino G, Furlan R, Centonze D.	Interleukin-beta promotes long-term potentiation in patients with multiple sclerosis	The immune system shapes synaptic transmission and plasticity in experimental autoimmune encephalomyelitis (EAE), the mouse model of multiple sclerosis (MS). These synaptic adaptations are believed to drive recovery of function after brain lesions, and also learning and memory deficits and excitotoxic neurodegeneration; whether inflammation influences synaptic plasticity in MS patients is less cl…	Neuromolecular Med	2014	N	No diagnostic classification
Mori F.	Cortical plasticity predicts recovery from relapse in multiple sclerosis	Background: Relapsing–remitting multiple sclerosis (RRMS) is characterized by the occurrence of clinical relapses, followed by remitting phases of a neurological deficit. Clinical remission after a relapse can be complete, with a return to baseline function that was present before, but is sometimes only partial or absent. Remyelination and repair of the neuronal damage do contribute to recovery, …	Multiple Sclerosis Journal	2014	N	No diagnostic classification
Nantes et al	Cortical Damage and Disability in Multiple Sclerosis: Relation to Intracortical Inhibition and Facilitation	shed light on pathophysiological and adaptive neural processes related to the clinical severity of neurological conditions such as multiple sclerosis (MS). Objective: Among people with relapsing-remitting and progressive forms of MS, we assessed the extent to which transcranial magnetic stimulation (TMS)-based biomarkers of excitatory and inhibitory cortical activity are related to cortical damag…	Brain Stimulation	2016	N	No diagnostic classification
Nantes J.C., Zhong J., Holmes S.A., Whatley B., Narayanan S., Lapierre Y., Arnold D.L., Koski L.	Intracortical inhibition abnormality during the remission phase of multiple sclerosis is related to upper limb dexterity and lesions	Objective: The impact of inhibitory cortical activity on motor impairment of people with relapsing-remitting multiple sclerosis (RRMS) has not been fully elucidated despite its relevance to neurorehabilitation. The present study assessed the extent to which transcranial magnetic stimulation (TMS)-based metrics of intracortical inhibition are related to motor disability and brain damage. Methods: …	Clinical Neurophysiology	2016	N	No diagnostic classification
Neva J.L., Lakhani B., Brown K.E., Wadden K.P., Mang C.S., Ledwell N.H.M., Borich M.R., Vavasour I.M., Laule C., Traboulsee A.L., MacKay A.L., Boyd L.A.	Multiple measures of corticospinal excitability are associated with clinical features of multiple sclerosis	In individuals with multiple sclerosis (MS), transcranial magnetic stimulation (TMS) may be employed to assess the integrity of corticospinal system and provides a potential surrogate biomarker of disability. The purpose of this study was to provide a comprehensive examination of the relationship between multiple measures corticospinal excitability and clinical disability in MS (expanded disabili…	Behavioural Brain Research	2016	N	No diagnostic classification
Nicoletti C.G., et al.	Treatment with dimethyl fumarate enhances cholinergic transmission in multiple sclerosis	Background: Dimethyl fumarate (DMF) exerts anti-inflammatory effects in multiple sclerosis by activating the Nrf2 antioxidant pathway, which is also stimulated by acetylcholine via alpha-7 nicotinic acetylcholine receptors. In animal models, Nrf2 potentiates cholinergic synaptic plasticity. Objective: The aim of this study was to test whether treatment with DMF modulates cholinergic pathways in r…	CNS Drugs	2019	N	No diagnostic classification
Nielsen JF	Improvement of amplitude variability of motor evoked potentials in multiple sclerosis patients and in healthy subjects	Variability of the amplitude of motor evoked potentials was studied in 33 multiple sclerosis (MS) patients and 21 healthy subjects. Normal probability plots revealed skewness of the distribution of amplitudes obtained from the abductor pollicis brevis (APB) muscle during muscle relaxation, muscle contraction, and by paired magnetic stimulation. Natural logarithmic transformation of amplitude data…	Electroencephalography and Clinical Neurophysiology	1996	N	No diagnostic classification
O'Connor et al.	Evoked potential abnormality scores are a useful measure of disease burden in relapsing-remitting multiple sclerosis	Fifty patients with relapsing-remitting multiple sclerosis were examined and studied with serial evoked potential and magnetic resonance imaging (MRI) measurements as part of a clinical trial. An evoked potential abnormality score (EPAS) for each testing session was calculated consisting of the total number of abnormal tests. The EPAS correlated well with Expanded Disability Status Scale (EDSS) a…	Annals of Neurology	1998	N	No diagnostic classification
Perretti et al	Post-exercise facilitation and depression of motor evoked potentials to transcranial magnetic stimulation: a study in multiple sclerosis	Objective: To evaluate motor cortex excitability changes by transcranial magnetic stimulation (TMS) following repetitive muscle contractions in patients with multiple sclerosis (MS); to state whether a typical pattern of post-exercise motor evoked potentials (MEPs) is related to clinical fatigue in MS. Methods: In 41 patients with definite MS (32 with fatigue and 9 without fatigue according to Fa…	Clinical Neurophysiology	2004	N	No diagnostic classification
Petajan & White	Motor-evoked potentials in response to fatiguing grip exercise in multiple sclerosis patients	Objective: This study examined central and peripheral effects of fatiguing exercise (3 min maximal grip) in healthy controls (n  10) and multiple sclerosis (MS) subjects with weakness, MS-W (n  16) and normal motor function, MS-NM (n  16) in the studied extremity. Method: Transcranial magnetic stimulation (TMS) was used to assess resting and facilitated motor-evoked potentials (MEPs) of abduct…	Clinical Neurophysiology	2000	N	No diagnostic classification
Radetz A.	Linking Microstructural Integrity and Motor Cortex Excitability in Multiple Sclerosis	Motor skills are frequently impaired in multiple sclerosis (MS) patients following grey and white matter damage with cortical excitability abnormalities. We applied advanced diffusion imaging with 3T magnetic resonance tomography for neurite orientation dispersion and density imaging (NODDI), as well as diffusion tensor imaging (DTI) in 50 MS patients and 49 age-matched healthy controls to quanti…	Frontiers in Immunology	2021	N	No diagnostic classification
Rossi S et al	Interleukin-1β causes synaptic hyperexcitability in multiple sclerosis	Objective: The frequency of inflammatory episodes in the early stages of multiple sclerosis (MS) has been correlated with late neurodegeneration, but the mechanism by which inflammation gives rise to delayed neuronal damage is unknown. Increased activity of the neurotransmitter glutamate is thought to play a role in the inflammation-driven neurodegenerative process of MS, and therefore we tested …	Acta Neurologica Scandinavica	2012	N	No diagnostic classification
Rossi S, Mancino R, Bergami A, Mori F, Castelli M, De Chiara V, Studer V, Mataluni G, Sancesario G, Parisi V, Kusayanagi H, Bernardi G, Nucci C, Bernardini S, Martino G, Furlan R, Centonze D.	Potential role of IL-13 in neuroprotection and cortical excitability regulation in multiple sclerosis	Background: Inflammation triggers secondary neurodegeneration in multiple sclerosis (MS). Objectives: It is unclear whether classical anti-inflammatory cytokines have the potential to interfere with synaptic transmission and neuronal survival in MS. Methods: Correlation analyses between cerebrospinal fluid (CSF) contents of anti-inflammatory cytokines and molecular, imaging, clinical, and neuroph…	Multiple Sclerosis Journal	2011	N	No diagnostic classification
Russo M, Naro A, Leo A, Sessa E, D'Aleo G, Bramanti P, Calabrò RS.	Evaluating Sativex® in Neuropathic Pain Management: A Clinical and Neurophysiological Assessment in Multiple Sclerosis	Objective: The aim of our study was to better investigate the role of Sativex(®) in improving pain in multiple sclerosis (MS) patients by means of either clinical or neurophysiological assessment. Setting: Pain is a common symptom of MS, affecting up to 70% of patients. Pain treatment is often unsatisfactory, although emerging drugs (including cannabinoids) are giving encouraging results. Clinica…	Pain Med	2016	N	No diagnostic classification
Russo, M; Calabro, RS; Naro, A; Sessa, E; Rifici, C; D'Aleo, G; Leo, A; De Luca, R; Quartarone, A; Bramanti, P	Sativex in the Management of Multiple Sclerosis-Related Spasticity: Role of the Corticospinal Modulation	Sativex is an emergent treatment option for spasticity in patients affected by multiple sclerosis (MS). This oromucosal spray, acting as a partial agonist at cannabinoid receptors, may modulate the balance between excitatory and inhibitory neurotransmitters, leading to muscle relaxation that is in turn responsible for spasticity improvement. Nevertheless, since the clinical assessment may not be …	NEURAL PLASTICITY	2015	N	No diagnostic classification
Sandroni et al	Fatigue' in Patients With Multiple Sclerosis Motor Pathway Conduction and Event-Related Potentials	Ten patients with a definite diagnosis of multiple sclerosis and complaints of "fatigue" were studied using (1) reaction times and event-related potentials accompanying the performance of auditory memory tasks (target detection, verbal short-term memory) and (2) motor conduction velocities of the pyramidal tract elicited by cerebral and cervical magnetic stimulation. Patients were studied when "r…	Archives of Neurology	1992	N	No diagnostic classification
Santarnecchi et al	Neurophysiological Correlates of Central Fatigue in Healthy Subjects and Multiple Sclerosis Patients before and after Treatment with Amantadine	In ten healthy subjects and in ten patients suffering from Multiple Sclerosis (MS), we investigated the cortical functional changes induced by a standard fatiguing repetitive tapping task.The Cortical Silent Period (CSP), an intracortical,mainly GABAB-mediated inhibitory phenomenon, was recorded by two different hand muscles, one acting as prime mover of the fatiguing index-thumb tapping task (Fi…	Neural Plasticity	2015	N	No diagnostic classification
Scheidegger et al	Corticospinal output during muscular fatigue differs in multiple sclerosis patients compared to healthy controls	Background: In multiple sclerosis (MS), fatigue is a common and often disabling symptom. It has multiple causes with central motor fatigue playing an important role. Objective: The objective of this study was to analyse the central motor conduction changes in relation to muscle contraction force during muscle fatigue and recovery in MS patients compared to healthy controls. Methods: A total of 23…	Multiple Sclerosis Journal	2012	N	No diagnostic classification
Schlaeger R et al	Prediction of MS disability by multimodal evoked potentials: investigation during relapse or in the relapse-free interval?	Objective: Little is known about optimal timing of multimodal evoked potential (EP)-investigations regarding prediction of MS disability. The aim of this study was to investigate whether timing of EP-investigations during a relapse or in the relapse-free interval influences prediction of MS disability. Methods: Two groups of MS patients with similar age and gender distributions received visual, m…	Clinical Neurophysiology	2014	N	No diagnostic classification
Schubert M, et al.	Walking and fatigue in multiple sclerosis: the role of the corticospinal system	Transcranial magnetic stimulation was used to study motor evoked potentials (MEPs) of leg muscles in controls and patients with multiple sclerosis (MS) before and after walking. In controls, MEP areas were significantly reduced after walking. A similar or greater reduction was seen in most patients, although there was a wide range of values. The M waves were unchanged. We conclude that walking in…	Muscle and Nerve	1998	N	No diagnostic classification
Sheean GL et al	An open-labelled clinical and electrophysiological study of 3,4 diaminopyridine in the treatment of fatigue in multiple sclerosis	We studied the electrophysiological parameters of motor performance in eight patients with multiple sclerosis and troublesome fatigue, before and after treatment with 3,4-diaminopyridine. Symptomatic fatigue was evaluated by the Krupp Fatigue Severity Score and motor performance of adductor pollicis by transcranial magnetic stimulation, rapid voluntary movements and a fatiguing exercise test of a…	Brain	1998	N	No diagnostic classification
Simo M et al	Predictive role of evoked potential examinations in patients with clinically isolated optic neuritis in light of the revised McDonald criteria	To analyse the sensitivity and role of somatosensory and motor evoked potentials (EP) in patients with a first episode of clinically isolated optic neuritis (ON) in predicting the development and course of multiple sclerosis (MS), 27 patients with ON underwent EP and magnetic resonance imaging (MRI) examinations at presentation. Follow-up MRI scans were also performed (mean: 20, range: 4–48 month…	Multiple Sclerosis Journal	2008	N	No diagnostic classification
Simpson M	Effects of modified-release fampridine on upper limb impairment in patients with Multiple Sclerosis	Background: Modified-release 4-aminopyridine (fampridine-MR) is used in the symptomatic treatment of walking disability in patients with multiple sclerosis (MS). Its potential for use in other MS symptoms remains unproven and its mode of action in this context is uncertain. Interest is growing in the use of upper limb outcome measures in clinical trials in patients with Multiple Sclerosis, partic…	Multiple Sclerosis and Related Disorders	2020	N	No diagnostic classification
Stampanoni Bassi M, Buttari F, Nicoletti CG, Mori F, Gilio L, Simonelli I, De Paolis N, Marfia GA, Furlan R, Finardi A, Centonze D, Iezzi E.	Interleukin-1β Alters Hebbian Synaptic Plasticity in Multiple Sclerosis	In multiple sclerosis (MS), inflammation alters synaptic transmission and plasticity, negatively influencing the disease course. In the present study, we aimed to explore the influence of the proinflammatory cytokine IL-1β on peculiar features of associative Hebbian synaptic plasticity, such as input specificity, using the paired associative stimulation (PAS). In 33 relapsing remitting-MS patient…	Int J Mol Sci	2020	N	No diagnostic classification
Stampanoni Bassi M.	Age at Disease Onset Associates With Oxidative Stress, Neuroinflammation, and Impaired Synaptic Plasticity in Relapsing-Remitting Multiple Sclerosis	Age at onset is the main risk factor for disease progression in patients with relapsing-remitting multiple sclerosis (RR-MS). In this cross-sectional study, we explored whether older age is associated with specific disease features involved in the progression independent of relapse activity (PIRA). In 266 patients with RR-MS, the associations between age at onset, clinical characteristics, cerebr…	Frontiers in Aging Neuroscience	2021	N	No diagnostic classification
Tecchio F et al	Brain Plasticity Effects of Neuromodulation Against Multiple Sclerosis Fatigue	Rationale: We recently reported on the efficacy of a personalized transcranial direct current stimulation (tDCS) treatment in reducing multiple sclerosis (MS) fatigue. The result supports the notion that interventions targeted at modifying abnormal excitability within the sensorimotor network could represent valid non-pharmacological treatments. Objective: The present work aimed at assessing whet…	Frontiers in Neurology	2015	N	No diagnostic classification
Thickbroom GW et al	Enhanced corticomotor excitability with dynamic fatiguing exercise of the lower limb in multiple sclerosis	Objective: To determine if task performance and fatigability during rapid repetitive exercise of the lower limb differ in a group of MS subjects compared to a control group, and what central changes accompany the development of fatigue and the period of recovery. Methods: Transcranial magnetic stimulation (TMS) was used to compare motor evoked potential (MEP) responses between 10 clinically defin…	Journal of Neurology	2008	N	No diagnostic classification
Vucic et al	Cortical dysfunction underlies disability in multiple sclerosis	Background: Gray matter atrophy has been implicated in the development of secondary progressive multiple sclerosis (SPMS). Cortical function may be assessed by transcranial magnetic stimulation (TMS). Determining whether cortical dysfunction was a feature of SPMS could be of pathophysiological significance. Objectives: Consequently, novel paired-pulse threshold tracking TMS techniques were used t…	Multiple Sclerosis Journal	2012	N	No diagnostic classification
White & Petajan	Physiological measures of therapeutic response to interferon beta-1a treatment in remitting-relapsing MS	Objective: This pilot study was designed to determine the effects of interferon beta-1a (IFNB) therapy (Avonexw) on cortically evoked motor potentials (MEPs) during resting and fatigued states in individuals with multiple sclerosis (MS). Methods: Eight women with relapsing–remitting MS (mean age 36) and mean Expanded Disability Status Scale (EDSS) score of 3.1 were evaluated before and after 3, 6…	Clinical Neurophysiology	2004	N	No diagnostic classification
White et al	Effect of passive whole body heating on central conduction and cortical excitability in multiple sclerosis patients and healthy controls	Heat stress is associated with increased fatigue perception and decrements in function for individuals with multiple sclerosis (MS). Similarly, healthy individuals experience decrements in exercise performance during hyperthermia. Alterations in central nervous system (CNS) function during hyperthermia include reduced voluntary activation of muscle and increased effort perception. The purpose of …	Journal of Applied Physiology	2013	N	No diagnostic classification
Zeller et al	Excitability decreasing central motor plasticity is retained in multiple sclerosis patients	Background: Compensation of brain injury in multiple sclerosis (MS) may in part work through mechanisms involving neuronal plasticity on local and interregional scales. Mechanisms limiting excessive neuronal activity may have special significance for retention and (re-)acquisition of lost motor skills in brain injury. However, previous neurophysiological studies of plasticity in MS have investiga…	BMC Neurology	2012	N	No diagnostic classification
Zeller et al	Functional role of ipsilateral motor areas in multiple sclerosis	Background: In patients with multiple sclerosis (MS), motor tasks are associated with increased activation of ipsilateral motor cortical areas. We examined the role of two ipsilateral motor areas during performance of a simple motor task in MS-patients in relation to their motor impairment and CNS injury. Methods: Single pulses of transcranial magnetic stimulation (TMS) were used to interfere tra…	Journal of Neurology, Neurosurgery and Psychiatry	2011	N	No diagnostic classification
Zeller et al	Rapid-onset central motor plasticity in multiple sclerosis	Objective: To study rapid-onset central motor plasticity, and its relationship to motor impairment and CNS injury in patients with multiple sclerosis (MS). Methods: In this cross-sectional observational study, motor plasticity was examined neurophysiologically and behaviorally in 22 patients with moderately severe (median Expanded Disability Status Scale score 2.5 [0–6]) stable MS and matched hea…	Neurology	2010	N	No diagnostic classification
Zipser C et al	Cortical Excitability and Interhemispheric Connectivity in Early Relapsing–Remitting Multiple Sclerosis Studied With TMS-EEG	Evoked potentials (EPs) are well established in clinical practice for diagnosis and prognosis in multiple sclerosis (MS). However, their value is limited to the assessment of their respective functional systems. Here, we used transcranial magnetic stimulation (TMS) coupled with electroencephalography (TMS-EEG) to investigate cortical excitability and spatiotemporal dynamics of TMS-evoked neural a…	Frontiers in Neuroscience	2018	N	No diagnostic classification
Di Lazzaro, V; Oliviero, A; Profice, P; Ferrara, L; Saturno, E; Pilato, F; Tonali, P	The diagnostic value of motor evoked potentials	Objective: To assess the diagnostic usefulness of motor evoked potentials (MEPs) and to identify the optimal method for calculating the central conduction time. The test results were evaluated in a prospective study of 1023 neurological patients. Methods: We evaluated the correlation between clinical and electrophysiological findings, the accuracy, the sensitivity, the percentage of subclinical a…	CLINICAL NEUROPHYSIOLOGY	1999	N	No MS diagnostic criteria
Meyer B-U et al	First diagnostic applications of transcranial inhibition in diseases affecting callosal neurones (multiple sclerosis, hydrocephalus, Huntington disease)		Electroencephalography and Clinical Neurophysiology	1999	N	No MS diagnostic criteria
Berardelli A et al	Stimulation of motor tracts in multiple sclerosis	Stimulation of motor tracts in multiple sclerosis	Journal of Neurology, Neurosurgery and Psychiatry	1988	N	No TMS
Boutiere C et al	Improvement of spasticity following intermittent theta burst stimulation in multiple sclerosis is associated with modulation of resting-state functional connectivity of the primary motor cortices	Background: Intermittent theta burst stimulation (iTBS) of the primary motor cortex improves transiently lower limbs spasticity in multiple sclerosis (MS). However, the cerebral mechanisms underlying this effect have never been investigated. Objective: To assess whether modulation of spasticity induced by iTBS is underlined by functional reorganization of the primary motor cortices. Methods: A to…	Multiple Sclerosis Journal	2017	N	No TMS
Comi G et al	Correlation between multimodal evoked potentials and magnetic resonance imaging in multiple sclerosis	Sixty multiple sclerosis (MS) patients (33 definite, 13 probale and 14 suspected were investigated by computed tomography (CT), magnetic resonance imaging (MRI), multimodality evoked potentials (EPs) and cerebrospinal fluid (CSF) electrophoresis. MRI abnormalities were found in 50 cases, while at least one abnormal evoked potential was detected in each of 52 cases. Brain-stem auditory evoked pote…	Journal of neurology	1989	N	No TMS
Compston D et al	A double-blind controlled trial of high dose methylprednisolone in patients with multiple sclerosis: 2. Laboratory results.	Laboratory measurements were compared in paired samples from 50 patients included in a double-blind placebo controlled trial of methylprednisolone in the treatment of multiple sclerosis. Cerebrospinal fluid total cell count, IgG and C9 indices, and percentage of peripheral blood OKT8 positive cells were abnormal at entry and returned closer to the normal range after active than placebo treatment,…	Journal of Neurology, Neurosurgery, & Psychiatry	1987	N	No TMS
Farlow MR et al	Multiple sclerosis: Magnetic resonance imaging, evoked potentials, and spinal fluid electrophoresis	Article abstract-Magnetic resonance images (MRI), evoked responses (ER), and CSF findings were compared in 39 patients with possible, probable, or definite MS. MRI disclosed multiple lesions (72%) more often than ERs (55%) in the total group of patients	Neurology	1986	N	No TMS
Filippini G et al	Sensitivities and predictive values of paraclinical tests for diagnosing multiple sclerosis	The sensitivities and predictive values of visual, somatosensory, and brain auditory evoked potentials (EPs), cerebrospinal fluid oligoclonal banding (CSF-OB) and magnetic resonance imaging (MRI) were evaluated for the early diagnosis of clinically definite multiple sclerosis (CDMS). Paraclinical evidence of asymptomatic lesions allows a diagnosis of CDMS. Eightytwo patients in whom MS was suspec…	Journal of Neurology	1994	N	No TMS
Gaede G et al	Safety and preliminary efficacy of deep transcranial magnetic stimulation in MS-related fatigue	Objective: To conduct a randomized, sham-controlled phase I/IIa study to evaluate the safety and preliminary efficacy of deep brain H-coil repetitive transcranial magnetic stimulation (rTMS) over the prefrontal cortex (PFC) and the primary motor cortex (MC) in patients with MS with fatigue or depression (NCT01106365). Methods: Thirty-three patients with MS were recruited to undergo 18 consecutive…	Neurology	2018	N	No TMS
Giesser BS et al	Trimodal evoked potentials compared with magnetic resonance imaging in the diagnosis of multiple sclerosis	Twenty-three patients with the clinical diagnosis of possible multiple sclerosis (MS) were tested with magnetic resonance imaging (MRI) and trimodal evoked potentials. Fourteen patients showed abnormalities on both MRI scans and at least one evoked potential modality (65%). Four patients had normal MRI scans but at least one abnormality on evoked potential testing (17%). One patient had normal tr…	Archives of Neurology	1987	N	No TMS
Goodman A et al	Sustained-release oral fampridine in multiple sclerosis: a randomised, double-blind, controlled trial	Background Clinical studies suggested that fampridine (4-aminopyridine) improves motor function in people with multiple sclerosis. This phase III study assessed efficacy and safety of oral, sustained-release fampridine in people with ambulatory deficits due to multiple sclerosis. Methods We undertook a randomised, multicentre, double-blind, controlled phase III trial. We randomly assigned 301 pat…	Lancet	2009	N	No TMS
Iragui V et al	Serial Recordings of Multimodality Evoked Potentials in Multiple Sclerosis: A Four Year Follow-up Study	ABSTRACT: Pattern reversal visual, brain-stem auditory, and short latency median nerve somatosensory evoked potentials (EPs) were evaluated in a prospective study over 4 years in 20 patients with clinically definite sclerosis (MS). Standardized neurological examinations were done at regular intervals and correlated with EP findings. The highest incidence of EP abnormalities occurred in the visual…	Canadian Journal of Neurological Sciences	1986	N	No TMS
La Mantia L et al	Serial evoked potentials in multiple sclerosis bouts. Relation to steroid treatment	Serial recordings of multimodal sensory (visual, acoustic and somatosensory) evoked potentials were made in 19 relapsing-remitting Multiple Sclerosis patients enrolled in a clinical trial designed to evaluate the efficacy of dexamethasone versus high- and low-dose methylprednisolone in acute multiple sclerosis bouts. Electrophysiological and clinical evaluations were performed at the onset of the…	Italian Journal of Neurological Sciences	1994	N	No TMS
Lee KH et al	Magnetic resonance imaging of the head in the diagnosis of multiple sclerosis: A prospective 2-year follow-up with comparison of clinical evaluation, evoked potentials, oligoclonal banding, and CT		Neurology	1991	N	No TMS
Lee M et al	The motor cortex shows adaptive functional changes to brain injury from multiple sclerosis	Although multiple sclerosis (MS) is an inflammatory demyelinating disease, there can be substantial axonal injury and loss. We therefore hypothesized that adaptive cortical changes may contribute to limiting functional impairment, particularly in the early stages of the disease. To test our hypothesis, we used functional magnetic resonance imaging (MRI) to characterize the localization and volume…	Annals of Neurology	2000	N	No TMS
Pantano P et al	Contribution of corticospinal tract damage to cortical motor reorganization after a single clinical attack of multiple sclerosis	The objectives of this study were to assess whether cortical motor reorganization in the early phase of multiple sclerosis (MS) is correlated with the clinical presentation and with specific damage to the corticospinal tract. Twenty patients with clinically isolated syndrome (CIS) and serial MR findings indicative of MS were selected. In 10 patients the CIS was hemiparesis (group H), and in 10 pa…	NeuroImage	2002	N	No TMS
Paty DW et al	MRI in the diagnosis of MS: A prospective study with comparison of clinical evaluation, evoked potentials,oligoclonal banding, and CT	compared the diagnostic capabilities of MRI to CT, evoked potentials (EP), and CSF oligoclonal banding analysis in aprospective evaluation of 200 patients with suspected multiple sclerosis (MS). MRI was the best method for demonstrating dissemination in space. An abnormal appropriate EP in monosymptomatic disease was usually supported by MRI and CSF anaylsis as being predictive of MS as a clinica…	Neurology	1988	N	No TMS
San AU et al	The Effect of Repetitive Transcranial Magnetic Stimulation on Spasticity in Patients with Multiple Sclerosis	Background and purpose: This randomized controlled study examined the effect of repetitive transcranial magnetic stimulation (rTMS) on spasticity in patients with multiple sclerosis (MS). Methods: This study included 16 patients with a history of MS and spasticity in the adductor hip muscles according to the Modified Ashworth Scale (MAS). The participants were randomized into the active group (n=…	Journal of Clinical Neurology	2019	N	No TMS
Smith T et al	Evoked potentials in multiple sclerosis before and after high-dose methylprednisolone infusion		European Neurology	1986	N	No TMS
Tramontano M et al	Cerebellar Intermittent Theta-Burst Stimulation Combined with Vestibular Rehabilitation Improves Gait and Balance in Patients with Multiple Sclerosis	Difficulties in gait and balance disorders are among the most common mobility limitations in multiple sclerosis (MS), mainly due to a damage of cerebellar circuits. Moreover, the cerebellum plays a critical role in promoting new motor tasks, which is an essential function for neurorehabilitation. In this study, we investigated the effects of cerebellar intermittent theta burst stimulation (c-iTBS…	Cerebellum	2020	N	No TMS
León Ruiz M, Sospedra M, Arce Arce S, Tejeiro-Martínez J, Benito-León J.	Current evidence on the potential therapeutic applications of transcranial magnetic stimulation in multiple sclerosis: A systematic review of the literature	Introduction: A growing number of studies have evaluated the effects of transcranial magnetic stimulation (TMS) for the symptomatic treatment of multiple sclerosis (MS). Methods: We performed a PubMed search for articles, recent books, and recommendations from the most relevant clinical practice guidelines and scientific societies regarding the use of TMS as symptomatic treatment in MS. Conclusio…	Neurologia (Engl Ed)	2018	N	Not English
Claus D et al	Corticospinal conduction studied with magnetic double stimulation in the intact human	A group of 8 healthy normal subjects (24–36 years old, mean age 29 years) were investigated. Transcranial magnetic double stimulation of the motor cortex was carried out at different interstimulus intervals. With both stimuli suprathreshold, an attenuation of the test response was found at interstimulus intervals of less than 200 msec (target relaxed or contracted). The manifestation of this atte…	Journal of the Neurological Sciences	1992	N	Not MS
Misra UK et al	A clinical, MRI and neurophysiological study of acute transverse myelitis	There is paucity of studies correlating the MRI and evoked potential changes in acute transverse myelitis (ATM). We studied ten patients with ATM (age range 14-57 years; 8 men, 2 women) who were subjected to clinical, MRI and neurophysiological evaluation. The latter included median and tibial somatosensory evoked potentials (SEP), motor evoked potentials (MEP) to upper and lower limbs and concen…	Journal of the Neurological Sciences	1996	N	Not MS
Zentner J & Meyer B	Diagnostic significance of MEP elicited by electrical and magnetoelectric stimulation in acute/subacute supratentorial lesions	Motor evoked potentials (MEP) elicited by transcranial electrical and magnetoelectric stimulation were examined prospectively in a total of 122 patients with supratentorial tumorous and nontumorous lesions in an acute/subacute neurosurgical setting. All patients had a hemiparesis contralateral to the lesion. It was the aim of our study to define the diagnostic significance of MEP with respect to …	Electromyography and Clinical Neurophysiology	1998	N	Not MS
Fernandez, V	The Use of Motor-Evoked Potentials in Clinical Trials in Multiple Sclerosis	Motor-evoked potentials (MEPs) can be used to assess the integrity of the descending corticospinal tract in the laboratory. Evoked potentials (EPs) have been widely used in the past for the diagnosis of multiple sclerosis (MS), but they are now becoming more useful in assessing the prognosis of the disease. Motor-evoked potentials have been included in EP scales that have demonstrated good correl…	JOURNAL OF CLINICAL NEUROPHYSIOLOGY	2021	N	Not original research
Ferrazzano G.	Early diagnosis of secondary progressive multiple sclerosis: focus on fluid and neurophysiological biomarkers	Background and aims: Most patients with multiple sclerosis presenting with a relapsing-remitting disease course at diagnosis transition to secondary progressive multiple sclerosis (SPMS) 1-2 decades after onset. SPMS is characterized by predominant neurodegeneration and atrophy. These pathogenic hallmarks result in unsatisfactory treatment response in SPMS patients. Therefore, early diagnosis of …	Journal of Neurology	2021	N	Not original research
Hardmeier, M; Fuhr, P	Multimodal Evoked Potentials as Candidate Prognostic and Response Biomarkers in Clinical Trials of Multiple Sclerosis	Evoked potentials (EPs) measure quantitatively and objectively the alterations of central signal propagation in multiple sclerosis and have long been used for diagnosis. More recently, their utility for prognosis has been demonstrated in several studies, summarizing multiple EP modalities in a single score. In particular, visual, somatosensory, and motor EPs are useful because of their sensitivit…	JOURNAL OF CLINICAL NEUROPHYSIOLOGY	2021	N	Not original research
Kalkers NF et al	Motor evoked potential: a reliable and objective measure to document the functional consequences of multiple sclerosis	Objective: In an attempt to analyze whether MEP can serve as a valid measure for evaluating neurological dysfunction in multiple sclerosis (MS), we related MEP to clinical and MRI measures. Methods: Transcranial magnetic stimulation was applied in 52 MS patients to determine the central motor conduction time (CMCT) to the extremities. We calculated Z-scores for each CMCT (Zcmct) corrected for hei…	Clinical Neurophysiology	2007	N	Not original research
Chen, R; Cros, D; Curra, A; Di Lazzaro, V; Lefaucheur, JP; Magistris, MR; Mills, K; Roesler, KM; Triggs, WJ; Ugawa, Y; Ziemann, U	The clinical diagnostic utility of transcranial magnetic stimulation: Report of an IFCN committee	The review focuses on the clinical diagnostic utility of transcranial magnetic stimulation (TMS). The central motor conduction time (CMCT) is a sensitive method to detect myelopathy and abnormalities may be detected in the absence of radiological changes. CMCT may also detect upper motor neuron involvement in amyotrophic lateral sclerosis. The diagnostic sensitivity may be increased by using the …	CLINICAL NEUROPHYSIOLOGY	2008	R	Not original research
Groppa S, et al.	A practical guide to diagnostic transcranial magnetic stimulation: Report of an IFCN committee	Transcranial magnetic stimulation (TMS) is an established neurophysiological tool to examine the integrity of the fast-conducting corticomotor pathways in a wide range of diseases associated with motor dysfunction. This includes but is not limited to patients with multiple sclerosis, amyotrophic lateral sclerosis, stroke, movement disorders, disorders affecting the spinal cord, facial and other c…	Clinical Neurophysiology	2012	R	Not original research
Kan, RLD; Xu, GXJ; Shu, KT; Lai, FHY; Kranz, G; Kranz, GS	Effects of non-invasive brain stimulation in multiple sclerosis: systematic review and meta-analysis	Objective: The objective of this meta-analysis was to summarize evidence on the therapeutic effects of non-invasive brain stimulation (NIBS) on core symptoms of multiple sclerosis (MS). Specifically, findings from studies deploying transcranial direct current stimulation (tDCS) and repetitive transcranial magnetic stimulation (rTMS) protocols were summarized in this review. Methods: We systematic…	THERAPEUTIC ADVANCES IN CHRONIC DISEASE	2022	R	Not original research
Lascano, AM; Lalive, PH; Hardmeier, M; Fuhr, P; Seeck, M	Clinical evoked potentials in neurology: a review of techniques and indications	Evoked potentials (EPs) are a powerful and cost-effective tool for evaluating the integrity and function of the central nervous system. Although imaging techniques, such as MRI, have recently become increasingly important in the diagnosis of neurological diseases, over the past 30 years, many neurologists have continued to employ EPs in specific clinical applications. This review presents an over…	JOURNAL OF NEUROLOGY NEUROSURGERY AND PSYCHIATRY	2017	R	Not original research
Lefaucheur J.-P., Aleman A., Baeken C., Benninger D.H., Brunelin J., Di Lazzaro V., Filipovi? S.R., Grefkes C., Hasan A., Hummel F.C., Jääskeläinen S.K., Langguth B., Leocani L., Londero A., Nardone R., Nguyen J.-P., Nyffeler T., Oliveira-Maia A.J., Oliviero A., Padberg F., Palm U., Paulus W., Poulet E., Quartarone A., Rachid F., Rektorová I., Rossi S., Sahlsten H., Schecklmann M., Szekely D., Zi…	Evidence-based guidelines on the therapeutic use of repetitive transcranial magnetic stimulation (rTMS): An update (2014–2018)	A group of European experts reappraised the guidelines on the therapeutic efficacy of repetitive transcranial magnetic stimulation (rTMS) previously published in 2014 [Lefaucheur et al., Clin Neurophysiol 2014;125:2150-206]. These updated recommendations take into account all rTMS publications, including data prior to 2014, as well as currently reviewed literature until the end of 2018. Level A e…	Clinical Neurophysiology	2020	R	Not original research
Leocani L., Rocca M.A., Comi G.	MRI and neurophysiological measures to predict course, disability and treatment response in multiple sclerosis	Purpose of review: The expanding portfolio for multiple sclerosis treatment, together with the consensus that neurodegenerative processes occur since the early disease phases, has increased the need for paraclinical tests with prognostic value on disease evolution and treatment response. Recent findings: On the one hand, we face the development of MRI technology, from lesion detection, to global …	Current Opinion in Neurology	2016	R	Not original research
Rossi S, et al.	Safety and recommendations for TMS use in healthy subjects and patient populations, with updates on training, ethical and regulatory issues: Expert Guidelines	This article is based on a consensus conference, promoted and supported by the International Federation of Clinical Neurophysiology (IFCN), which took place in Siena (Italy) in October 2018. The meeting intended to update the ten-year-old safety guidelines for the application of transcranial magnetic stimulation (TMS) in research and clinical settings (Rossi et al., 2009). Therefore, only emergin…	Clinical Neurophysiology	2021	R	Not original research
Rossini P.M., Burke D., Chen R., Cohen L.G., Daskalakis Z., Di Iorio R., Di Lazzaro V., Ferreri F., Fitzgerald P.B., George M.S., Hallett M., Lefaucheur J.P., Langguth B., Matsumoto H., Miniussi C., Nitsche M.A., Pascual-Leone A., Paulus W., Rossi S., Rothwell J.C., Siebner H.R., Ugawa Y., Walsh V., Ziemann U.	Non-invasive electrical and magnetic stimulation of the brain, spinal cord, roots and peripheral nerves: Basic principles and procedures for routine clinical and research application: An updated report from an I.F.C.N. Committee	These guidelines provide an up-date of previous IFCN report on "Non-invasive electrical and magnetic stimulation of the brain, spinal cord and roots: basic principles and procedures for routine clinical application" (Rossini et al., 1994). A new Committee, composed of international experts, some of whom were in the panel of the 1994 "Report", was selected to produce a current state-of-the-art rev…	Clinical Neurophysiology	2015	R	Not original research
Simpson M., Macdonell R.	The use of transcranial magnetic stimulation in diagnosis, prognostication and treatment evaluation in multiple sclerosis	Despite advances in brain imaging which have revolutionised the diagnosis and monitoring of patients with Multiple Sclerosis (MS), current imaging techniques have limitations, including poor correlation with clinical disability and prognosis. There is growing evidence that electrophysiological techniques may provide complementary functional information which can aid in diagnosis, prognostication …	Multiple Sclerosis and Related Disorders	2015	R	Not original research
Snow N.J., Wadden K.P., Chaves A.R., Ploughman M.	Transcranial Magnetic Stimulation as a Potential Biomarker in Multiple Sclerosis: A Systematic Review with Recommendations for Future Research	Multiple sclerosis (MS) is a demyelinating disorder of the central nervous system. Disease progression is variable and unpredictable, warranting the development of biomarkers of disease status. Transcranial magnetic stimulation (TMS) is a noninvasive method used to study the human motor system, which has shown potential in MS research. However, few reviews have summarized the use of TMS combined …	Neural Plasticity	2019	R	Not original research
Swanson, CW; Proessl, F; Stephens, JA; Miravalle, AA; Fling, BW	Non-invasive brain stimulation to assess neurophysiologic underpinnings of lower limb motor impairment in multiple sclerosis	Background: Multiple sclerosis (MS) is a neuroinflammatory disease resulting in axonal demyelination and an amalgamation of symptoms which commonly result in decreased quality of life due to mobility dysfunction and limited participation in meaningful activities. New method: The use of non-invasive brain stimulation (NIBS) techniques, specifically transcranial magnetic and transcranial direct cur…	JOURNAL OF NEUROSCIENCE METHODS	2021	R	Not original research
Ziemann U., Wahl M., Hattingen E., Tumani H.	Development of biomarkers for multiple sclerosis as a neurodegenerative disorder	Multiple sclerosis (MS) is the most common neurological disorder leading to permanent disability in young adults in the developed world. While traditionally conceived as an autoimmune inflammatory disease it is becoming increasingly evident that axonal and neuronal degeneration occur, at least partly independent of inflammation, and already at the earliest stages of the disease. In addition, it i…	Progress in Neurobiology	2011	R	Not original research
Andersson T et al	A comparison of motor evoked potentials and somatosensory evoked potentials in patients with multiple sclerosis and potentially related conditions	Central motor conduction (CMC) and central sensory conduction (CSC) studied by means of magnetic cortical stimulation and recording of somatosensory evoked potentials, were examined and compared in 87 patients with multiple sclerosis or potentially related conditions. In all groups of patients (either grouped by diagnosis, clinical symptomatology or disease duration) there were more aberrations i…	Electromyography and Clinical Neurophysiology	1995	N	Sample size < 40
Bonfiglio L., Rossi B., Sartucci F.	Prolonged intracortical delay of long-latency reflexes: Electrophysiological evidence for a cortical dysfunction in multiple sclerosis	Convincing evidence suggests that long-latency reflexes (LLRs) are capable of testing the transcortical sensorimotor reflex arch. By subtracting the sum of the latencies of N20 (afferent branch) and transcranially elicited motor evoked potentials (MEP; efferent branch) from the LLR II latency, the cortical relay time (CRT) can also be obtained, which is alleged to represent the time required for …	Brain Research Bulletin	2006	N	Sample size < 40
Boroojerdi B., Hungs M., Mull M., Töpper R., Noth J.	Interhemispheric inhibition in patients with multiple sclerosis	Objectives: A single focal magnetic stimulus applied to the motor cortex of normal subjects can suppress ongoing voluntary electromyographic activity in ipsilateral small hand muscles. This inhibition is mediated from one motor cortex to the contralateral side via a transcallosal pathway. Methods: We have investigated transcallosal inhibition in 24 patients with definite multiple sclerosis (MS) a…	Electroencephalography and Clinical Neurophysiology - Electromyography and Motor Control	1998	N	Sample size < 40
Britton TC et al	Variability of cortically evoked motor responses in multiple sclerosis	The calculated central motor conduction time (CMCT), onset latency variability (expressed as the mean consecutive difference; MCD) and amplitude (expressed as percentage of maximum peripheral M wave size) of electromyographic (EMG) responses in the first dorsal interosseous (FDI) muscle following magnetic motor cortex stimulation were investigated in 20 normal subjects and 21 patients with multip…	Electroencephalography and Clinical Neurophysiology	1991	N	Sample size < 40
Bühler R et al	The triple stimulation technique to study central motor conduction to the lower limbs	Objective: To quantify the percentage of motor units of a foot muscle that can be activated by transcranial magnetic stimulation (TMS) in normal subjects and patients. Methods: We adapted the recently described triple stimulation technique (TST) for recordings from abductor hallucis (AH). Conventional motor evoked potentials (MEPs) of this muscle are usually small and variable in shape, because o…	Clinical Neurophysiology	2001	N	Sample size < 40
Colombo B et al	MRI and motor evoked potential findings in nondisabled multiple sclerosis patients with and without symptoms of fatique	Fatique is a common symptom of multiple sclerosis (MS) even in the early phases of the disease, when neurological disability is usually still not present. To investigate the pathophysiology of fatigue we compared neurophysiological (motor evoked potentials of the four limbs, MEPs) and brain magnetic resonance imaging (MRI) findings in two groups of nondisabled MS patients, those with (n=15) and t…	Journal of Neurology	2000	N	Sample size < 40
Cucurachi L, Immovilli P, Granella F, Pavesi G, Cattaneo L.	Short-latency afferent inhibition predicts verbal memory performance in patients with multiple sclerosis	Background: The pathogenesis of cognitive deficits in multiple sclerosis (MS) patients is the subject of debate. A causative role of grey matter impairment has been suggested. Acetylcholinesterase inhibitors have been proposed in the treatment of cognitive impairment in MS. Short-latency afferent inhibition (SAI) is a cortical phenomenon assessed by a transcranial magnetic stimulation protocol th…	J Neurol	2008	N	Sample size < 40
Di Sapio A et al	A new neurophysiological approach to assess central motor conduction damage to proximal and distal muscles of lower limbs	Objective: To develop a neurophysiological method to explore central motor pathways to proximal and distal muscles of lower limbs. Methods: MEPs to transcranial magnetic stimulation using the double cone coil were bilaterally and simultaneously recorded from vastus medialis, tibialis anterior and flexor hallucis brevis. Voluntary facilitation was controlled using a predefined sequence of movement…	Clinical Neurophysiology	2014	N	Sample size < 40
Feuillet L et al	Prospective clinical and electrophysiological follow-up on a multiple sclerosis population treated with interferon beta-1 a: a pilot study	Objective: To analyse transcranial magnetic stimulation (TMS) variables in a prospective six-month follow-up pilot study on patients suffering from relapsing-remitting multiple sclerosis (RRMS), satisfying inclusion criteria for interferon (IFN) beta-1a treatment. Background: So far, no predictive factors are available as to the course of RRMS treated with IFN beta-1 a. Design/methods: Fifteen RR…	Multiple Sclerosis Journal	2007	N	Sample size < 40
Fierro B, Salemi G, Brighina F, Buffa D, Conte S, La Bua V, Piazza A, Savettieri G.	A transcranial magnetic stimulation study evaluating methylprednisolone treatment in multiple sclerosis	Objective: To investigate the efficacy of two different high doses of intravenous methylprednisolone (IVMP) during Multiple Sclerosis (MS) relapses. Background: Transcranial Magnetic Stimulation (TMS) is the most sensitive neurophysiological ascertainment to quantify motor disability, to follow the recovery from an MS relapse, and to detect the response to treatment. Design and method: Twenty-fou…	Acta Neurol Scand	2002	N	Sample size < 40
Firmin et al	The latency distribution of motor evoked potentials in patients with multiple sclerosis	Objective: To compare the individual latency distributions of motor evoked potentials (MEP) in patients with multiple sclerosis (MS) to the previously reported results in healthy subjects (Firmin et al., 2011). Methods: We applied the previously reported method to measure the distribution of MEP latencies to 16 patients with MS. The method is based on transcranial magnetic stimulation and consist…	Clinical Neurophysiology	2012	N	Sample size < 40
Gagliardo A, et al.	Motor evoked potentials in multiple sclerosis patients without walking limitation: Amplitude vs. conduction time abnormalities	We used Motor Evoked Potentials (MEPs), elicited by transcranial magnetic stimulation, for assessing a motor pathways dysfunction in a selected group of Multiple Sclerosis (MS) patients, without limitation in walking. We selected 32 Relapsing Remitting MS patients, in remission phase, with EDSS < or = 3.5 and 20 healthy individuals with similar height and age distribution. We measured the followi…	Journal of Neurology	2007	N	Sample size < 40
Hess et al	Measurement of central motor conduction by magnetic brain stimulation		Lancet	1986	N	Sample size < 40
Ho et al	Changes in motor evoked potentials to short-interval paired transcranial magnetic stimuli in multiple sclerosis	and in 8 healthy controls to test the hypothesis that the circuits responsible for the generation and transmission of I-waves are abnormal in the former group Methods: A ®gure-of-8 coil discharging through a Magstim 200/Bistim con®guration delivered identical stimuli at an intensity 10% above the motor threshold of the relaxed ®rst dorsal interosseous muscle. The interstimulus intervals (ISIs) us…	Clinical Neurophysiology	1999	N	Sample size < 40
Hofstadt-van Oy, U; Keune, PM; Muenssinger, J; Hagenburger, D; Oschmann, P	Normative data and long-term test-retest reliability of the triple stimulation technique (TST) in multiple sclerosis	Objectives: Transcranial magnetic stimulation is useful for the assessment of cortico-spinal tract integrity in multiple sclerosis (MS). An advanced approach is the triple stimulation technique (TST), utilizing a combination of central and peripheral stimuli, reducing individual response variability. Although TST measures have been implemented in longitudinal studies, basic methodological data on…	CLINICAL NEUROPHYSIOLOGY	2015	N	Sample size < 40
Höppner J.	Demyelination and axonal degeneration in corpus callosum assessed by analysis of transcallosally mediated inhibition in multiple sclerosis	Objective: Following focal transcranial magnetic cortex stimulation (fTMS), inhibition of voluntary EMG activity in the ipsilateral first dorsal interosseus (FDI) muscle was studied, in order to assess the functional integrity of the corpus callosum in patients with multiple sclerosis (MS). Methods and results: Thirty-four patients suffering from definite MS and 12 healthy, age-matched normal sub…	Clinical Neurophysiology	1999	N	Sample size < 40
Ingram DA et al	Central motor conduction in multiple sclerosis: evaluation of abnormalities revealed by transcutaneous magnetic stimulation of the brain.	Magnetic stimulation of the brain and spinal column was used to assess conduction in the descending central motor pathways controlling arm and leg muscles of 20 patients with multiple sclerosis, and 10 normal subjects. The multiple sclerosis patients had relapsing and remitting disease but all were ambulant and in stable clinical remission. Increased central motor conduction times (CMCTs), up to …	Journal of Neurology, Neurosurgery, & Psychiatry	1988	N	Sample size < 40
Jones SM, et al	Lower extremity motor evoked potentials in multiple sclerosis	Transcranial magnetic stimulation was performed on 25 patients with definite multiple sclerosis. Motor evoked potentials were recorded from the anterior tibial muscle. Central motor conduction time was calculated using the equation (F + M-1)/2 by stimulation of the common peroneal nerve. Motor evoked potentials were capable of detecting subclinical pyramidal tract lesions in multiple sclerosis. I…	Archives of Neurology	1991	N	Sample size < 40
Jorgensen LM et al	MEP recruitment curves in multiple sclerosis and hereditary spastic paraplegia	Objective: Axons remodel at multiple levels after a single inflammatory lesion in the spinal cord, which can contribute to recovery. The primary aim of this study was to investigate whether the MEP response as function of the excitatory strength, here called recruitment curves, may be used in discriminating demyelination from compensated axonal loss. Multiple sclerosis (MS) represents both demyel…	Journal of the Neurological Sciences	2005	N	Sample size < 40
Jung P et al	Multimodal evoked potentials measure and predict disability progression in early relapsing-remitting multiple sclerosis		Multiple Sclerosis Journal	2008	N	Sample size < 40
Kiylioglu N., Parlaz A.U., Akyildiz U.O., Tataroglu C.	Evoked potentials and disability in multiple sclerosis: A different perspective to a neglected method	Objective: Because evoked potentials (EP) are reflections of the functional integrity of sensory-motor systems, they are expected to reflect the abnormality in patients with disabilities and handicaps and also be in correlation with scales. This assumption was tested. Methods: Patients with multiple sclerosis (MS) and myelopathy (M) and normal controls were investigated by EP, Multiple Sclerosis …	Clinical Neurology and Neurosurgery	2015	N	Sample size < 40
Kukowski B	Duration, configuration and amplitue of the motor response evoked by magnetic brain stimulation in patients with multiple sclerosis		Electroencephalography and Clinical Neurophysiology	1993	N	Sample size < 40
Michels R et al	Long-latency reflexes, somatosensory evoked potentials and transcranial magnetic stimulation: relation of the three methods in multiple sclerosis		Electroencephalography and Clinical Neurophysiology	1993	N	Sample size < 40
Miscio G, Guastamacchia G, Priano L, Baudo S, Mauro A.	Are the neurophysiological techniques useful for the diagnosis of diaphragmatic impairment in multiple sclerosis (MS)?	Objective: To characterize cortico-diaphragmatic pathway involvement in multiple sclerosis (MS) by means of transcranial magnetic stimulation (TMS), and verify its clinical impact. Methods: TMS from diaphragm (Dia), and abductor digiti minimi (AbdV degrees ) was performed in 26 MS patients. Phrenic nerve (PN) conduction study was also performed. Expanded disability status scale (EDSS) and fatigue…	Clin Neurophysiol	2003	N	Sample size < 40
Nielsen JF	Frequency-dependent conduction delay of motor-evoked potentials in multiple sclerosis	Paired transcranial magnetic stimulation was applied in 33 multiple sclerosis (MS) patients and in 21 healthy controls. A major abnormality was found in latency of the second motor-evoked potential in MS patients. At interstimulus intervals of 75, 100, and 150 ms the central motor conduction time (CMCT) was significantly prolonged in MS patients to 139%, 150%, and 125% of the CMCT of a single mag…	Muscle and Nerve	1998	N	Sample size < 40
Pallix-Guyot, M; Guennoc, AM; Blasco, H; de Toffol, B; Corcia, P; Praline, J	Predictive value of motor evoked potentials in clinically isolated syndrome	Objectives: To assess the predictive role of several measures obtained by transcranial magnetic stimulation (TMS) in patients with clinically isolated syndrome (CIS) for the risk of conversion to multiple sclerosis (MS) during the first 2 years. Materials and methods: We investigated 34 patients with CIS. After 2 years of follow-up and classification into two groups according to MS diagnosis, ini…	ACTA NEUROLOGICA SCANDINAVICA	2011	N	Sample size < 40
Pisa M.	Intracortical motor conduction is associated with hand dexterity in progressive multiple sclerosis	Background: Hand dexterity dysfunction is a key feature of disability in people with progressive multiple sclerosis (PMS). It underlies corticospinal tract (CST) and cerebellar integrity, as well as disruption of cortical networks, which are hardly assessed by standard techniques. Transcranial magnetic stimulation is a promising tool for evaluating the integrity of intracortical motor pathways. O…	Multiple Sclerosis Journal	2021	N	Sample size < 40
Ravnborg et al.	Standardization of facilitation of compound muscle action potentials evoked by magnetic stimulation of the cortex		Electroencephalography and Clinical Neurophysiology	1991	N	Sample size < 40
Rico, A; Audoin, B; Franques, J; Eusebio, A; Reuter, F; Malikova, I; Cherif, AA; Pouget, J; Pelletier, J; Attarian, S	Motor evoked potentials in clinically isolated syndrome suggestive of multiple sclerosis	The aim of the present study was to determine the sensitivity and the profile of motor evoked potentials (MEP) in patients with clinically isolated syndrome (CIS) suggestive of multiple sclerosis (MS). We measured the central motor conduction time (CMCT), amplitude ratio (AR), and surface ratio (SR) in tibialis anterior and first dorsal interosseous muscles in 22 patients with CIS. In 12 patients…	Multiple Sclerosis Journal	2009	N	Sample size < 40
Sahota P, Prabhakar S, Lal V, Khurana D, Das CP, Singh P.	Transcranial magnetic stimulation: role in the evaluation of disability in multiple sclerosis	Background: In patients with multiple sclerosis (MS), transcranial magnetic stimulation (TMS) has shown significant prolongation of central motor conduction time (CMCT). Abnormal CMCT may reflect sub-clinical involvement of motor pathways and correlate with clinical motor disability. Objective: To determine the diagnostic yield of TMS in MS and the possible correlation of TMS abnormalities with c…	Neurol India	2005	N	Sample size < 40
Salle JY, et al.	Improvement in motor evoked potentials and clinical course post-steroid therapy in multiple sclerosis	Motor evoked potentials (MEP) were recorded in 23 patients with definite relapsing multiple sclerosis before and after treatment with a short course of high dose of methylprednisolone. MEP were performed together with clinical examination just before treatment, and 6 and 60 days later. The following results were observed: (1) a statistically significant relationship between the corticospinal defi…	Journal of the Neurological Sciences	1992	N	Sample size < 40
Sheean GL et al	An electrophysiological study of the mechanism of fatigue in multiple sclerosis	Fatigue is a common and disabling symptom in multiple sclerosis but is poorly understood. We investigated 'physiological' fatigue in 21 patients with multiple sclerosis who complained of disabling fatigue by measuring the decline in strength during a 45 s maximal contraction of the adductor pollicis muscle. The results were compared with those from a control group of 19 healthy subjects. The stre…	Brain	1997	N	Sample size < 40
Smith SJ et al	F responses and central motor conduction in multiple sclerosis	Two electrophysiological investigations were used to study 18 patients with multiple sclerosis--F wave characteristics including amplitude, persistence and frequency, which can provide a measure of motoneurone excitability, and magnetic stimulation of the cortex, which enables measurement of conduction along central motor pathways. There was an increase in the mean amplitude and persistence of th…	Electroencephalography and Clinical Neurology	1989	N	Sample size < 40
Sue CM et al	Transcranial cortical stimulation in disorders of the central motor pathways		Journal of Clinical Neuroscience	1997	N	Sample size < 40
Tataroglu et al	Cortical Relay Time for Long Latency Reflexes in Patients with Definite Multiple Sclerosis	Background: Long latency reflexes (LLR) include afferent sensory, efferent motor and central transcortical pathways. It is supposed that the cortical relay time (CRT) reflects the conduction of central transcortical loop of LLR. Recently, evidence related to the cortical involvement in multiple sclerosis (MS) has been reported in some studies. Our aim was to investigate the CRT alterations in pat…	Canadian Journal of Neurological Sciences	2004	N	Sample size < 40
Thickbroom GW et al	Corticomotor organisation and motor function in multiple sclerosis		Journal of Neurology	2005	N	Sample size < 40
Uozumi T et al	Motor potentials evoked by magnetic stimulation of the motor cortex in normal subjects and patients with motor disorders	Motor evoked potentials (MEPs) elicited by magnetic coil stimulation of motor cortex were studied at rest and during maximum voluntary muscle contraction in 20 normal subjects and 42 patients with motor disorders. MEP parameters employed in this study included: onset latency, amplitude, MEP/M wave amplitude ratio and background EMG/MEP area ratio. Maximum voluntary contraction increased the ampli…	Electroencephalography and Clinical Neurophysiology	1991	N	Sample size < 40
van der Kamp W, et al.	Correlation of phasic muscle strength and corticomotoneuron conduction time in multiple sclerosis	Central motor conduction times for the adductor pollicis muscle, the twitch force of that muscle to scalp magnetic motor cortex stimulation, and the maximum force of phasic voluntary contraction of the same muscle were measured in 15 patients with multiple sclerosis. Two tests of manual dexterity of the same hand also were studied: the Purdue pegboard test, and the maximal frequency of a scissors…	Annals of Neurology	1991	N	Sample size < 40
Wahl et al	Motor Callosal Disconnection in Early Relapsing-Remitting Multiple Sclerosis	In relapsing-remitting multiple sclerosis (RRMS) the corpus callosum (CC) is often and early affected by macroscopic lesions when investigated by conventional MRI. We sought to determine to which extent microstructural and effective disconnection of the CC are already present in RRMS patients at the earliest stages of the disease prior to evidence of macroscopic CC lesion. We compared 16 very ear…	Human Brain Mapping	2011	N	Sample size < 40
Barker AT et al	Magnetic stimulation of the human brain and peripheral nervous system: an introduction and the results of an initial clinical evaluation	This report describes a novel method of stimulating the motor cortex and deep peripheral nerves in humans. The technique, developed in the Department of Medical Physics of Sheffield University, uses a large pulse of magnetic field to induce currents within the body and is painless. The basic principles of magnetic stimulation are described, and the technique is compared with conventional electric…	Neurosurgery	1987	N	Unable to find full text
Mathis, J; Hess, CW	Motor-evoked potentials from multiple target muscles in multiple sclerosis and cervical myelopathy	Motor-evoked potentials (MEP) from abductor digiti minimi (ADM), biceps brachii (BB) and tibialis anterior (TA) muscle were analysed in 101 patients with multiple sclerosis (MS) and in 72 patients with compressive cervical myelopathy (CM). In definite MS the results were abnormal in 82% and in probable or possible MS in 64% of patients. In CM results were abnormal in 56% when the compression site…	EUROPEAN JOURNAL OF NEUROLOGY	1996	N	Unable to find full text
Beer S et al	Diagnostic value of paraclinical tests in multiple sclerosis: relative sensitivities and specificities for reclassification according to the Poser committee criteria	The yield of paraclinical tests was evaluated in a prospective study of 189 consecutive patients referred for suspected multiple sclerosis (142 patients with multiple sclerosis, 47 non-multiple sclerosis patients on discharge). Patients were first classified according to the Poser criteria by the clinical findings. Subsequently, the results of paraclinical tests (cranial MRI, visually evoked pote…	Journal of Neurology, Neurosurgery, & Psychiatry	1995	Y
Caramia MD, et al.	Brain Excitability Changes in the Relapsing and Remitting Phases of Multiple Sclerosis: A Study with Transcranial Magnetic Stimulation	Objective: Recent functional and imaging studies have substantially contributed to extend the concept of multiple sclerosis (MS), classically regarded as a disease limited to the myelin axonal sheath. Several findings, in fact, point to a parallel involvement of neuronal components of the central nervous system (CNS) in the course of MS. In the present study, therefore, we explored, in MS patient…	Clinical Neurophysiology	2004	Y
Cruz-Martinez A et al	Disability in multiple sclerosis. The role of transcranial magnetic stimulation.		Electroencephalography and Clinical Neurophysiology	2000	Y
Facchetti D et al	Motor evoked potentials and disability in secondary progressive multiple sclerosis	Background: To investigate the mechanisms underlying disability in multiple sclerosis (MS), 40 patients with the relapsing-remitting form of the disease and 13 patients with secondary progressive MS underwent multimodal evoked potential (EP), motor evoked potential (MEP), and spinal motor conduction time evaluation. Clinical disability was evaluated by the expanded disability status scale (EDSS) …	Canadian Journal of Neurological Sciences	1997	Y
Hess CW et al	Magnetic brain stimulation: central motor conduction studies in multiple sclerosis	Central motor conduction (CMC) was evaluated in 32 normal subjects and 83 patients with multiple sclerosis, and the findings were correlated with clinical signs and evoked potential data. CMC time was obtained from the latency difference in responses from the abductor muscle of the little finger to magnetic stimulation of the motor cortex and electrical stimulation at the C-7/T-1 interspace. Mean…	Annals of Neurology	1987	Y
Jung, P; Beyerle, A; Hurnpich, M; Neumann-Haefelin, T; Lanfermann, H; Ziemann, U	Ipsilateral silent period: A marker of callosal conduction abnormality in early relapsing-remitting multiple sclerosis?	Objective: The corpus callosum (CC) is commonly affected in multiple sclerosis (MS). The ipsilateral silent period (iSP) is a putative electrophysiological marker of callosal demyelination. The purpose of this study was to re-assess, under recently established optimised protocol conditions [Jung P., Ziemann U. Differences of the ipsilateral silent period in small hand muscles. Muscle Nerve in pre…	JOURNAL OF THE NEUROLOGICAL SCIENCES	2006	Y
Kale et al	Electrophysiological and clinical correlates of corpus callosum atrophy in patients with multiple sclerosis	Multiple sclerosis (MS) is an idiopathic inflammatory demyelinating disorder of the central nervous system (CNS) characterized by demyelination and axonal degeneration. Corpus callosum (CC) is commonly involved during the disease process leading to atrophy (93%). Currently, there are no established markers of disease progression and the interplay of processes leading to brain atrophy in MS remain…	Neurological Research	2010	Y
Kale N et al	Correlation between disability and transcranial magnetic stimulation abnormalities in patients with multiple sclerosis	Multiple sclerosis (MS) is an idiopathic inflammatory demyelinating disorder of the central nervous system. Clinical evaluation, MRI, cerebrospinal fluid testing and evoked potentials (EP) are among the available methods utilized for disease diagnosis and monitoring. To date, no surrogate markers have been established to assess disease evolution and progression. The aim of this study is to assess…	Journal of Clinical Neuroscience	2009	Y
Kandler RH, et al	The role of magnetic stimulation in the diagnosis of multiple sclerosis	Magnetic stimulation was used to measure motor conduction time (MCT) between head and neck, and head and lumbar region, as well as amplitude of the motor evoked potential (MEP) in normal subjects and patients with multiple sclerosis (MS). Patients with definite MS had significantly longer MCTs and smaller amplitude MEPs than normal subjects when recording from arm and leg muscles. In a comparison…	Journal of the Neurological Sciences	1991	Y
Leocani L, et al	Multimodal evoked potentials to assess the evolution of multiple sclerosis: A longitudinal study	Background Evoked potentials are used in the functional assessment of sensory and motor pathways. Their usefulness in monitoring the evolution of multiple sclerosis has not been fully clarified. Objective The aim of this longitudinal study was to examine the usefulness of multimodal evoked potential in predicting paraclinical outcomes of disease severity and as a prognostic marker in multiple scl…	Journal of Neurology, Neurosurgery, & Psychiatry	2006	Y
Magistris MR et al	A clinical study of motor evoked potentials using a triple stimulation technique	Amplitudes of motor evoked potentials (MEPs) are usually much smaller than those of motor responses to maximal peripheral nerve stimulation, and show marked variation between normal subjects and from one stimulus to another. Consequently, amplitude measurements have low sensitivity to detect central motor conduction failures due to the broad range of normal values. Since these characteristics are…	Brain	1999	Y
Mayr N, et al.	The sensitivity of transcranial cortical magnetic stimulation in detecting pyramidal tract lesions in clinically definite multiple sclerosis	We determined central motor conduction time (CMCT) (motor cortex to root C-8 and motor cortex to root S-1) as well as the amplitude of the compound muscle action potentials in the hypothenar and the abductor hallucis muscles on both sides in 44 patients with definite MS. We compared the values with standards obtained from 86 healthy controls and correlated them with the degree of clinical deficit…	Neurology	1991	Y
Pisa M et al	Upper limb motor evoked potentials as outcome measure in progressive multiple sclerosis		Clinical Neurophysiology	2020	Y
Ravnborg et al.	The diagnostic reliability of magnetically evoked motor potentials in multiple sclerosis	In a prospective study, we evaluated the technique of magnetically evoked motor potentials (MEP) in the diagnosis of multiple sclerosis (MS). We consecutively included 68 patients with symptoms or signs compatible with a demyelinative CNS affection. We subjected all patients to CSF analysis, MRI studies of the brain and brainstem, visual evoked potentials (VEP), brainstem auditory evoked potentia…	Neurology	1992	Y
Schmierer K, et al.	Correlates of disability in multiple sclerosis detected by transcranial magnetic stimulation	Objective: To study the usefulness of corticospinally mediated excitatory responses and transcallosal inhibition (TI) elicited by transcranial magnetic stimulation (TMS) as a surrogate marker of disability in patients with different courses of MS. Methods: Focal TMS of the motor cortex was performed in 118 patients with MS (96 with relapsing-remitting, 19 with primary progressive, and three with …	Neurology	2002	Y
Schmierer K.	Conduction deficits of callosal fibres in early multiple sclerosis	Objective: To study the diagnostic usefulness of transcallosal inhibition (TI) elicited by transcranial magnetic stimulation (TMS) in detecting central conduction deficits in early multiple sclerosis. Corticospinally mediated excitatory responses evoked by TMS are accepted as a sensitive diagnostic tool in multiple sclerosis. Recently, TI evoked by TMS has been introduced as a new paradigm to tes…	Journal of Neurology Neurosurgery and Psychiatry	2000	Y
Tataroglu, C; Genc, A; Idiman, E; Cakmur, R; Idiman, F	Cortical silent period and motor evoked potentials in patients with multiple sclerosis	In order to determine the importance of central motor conduction time (CMCT) and silent period (SP) in patients with multiple sclerosis (MS), we enrolled this clinical and electrophysiological study. Additionally, we planned to compare the correlation between electrophysiological findings and clinical status. We examined 58 patients with definite MS and 31 controls. Patients were classified as re…	CLINICAL NEUROLOGY AND NEUROSURGERY	2003	Y
