# Supplementary material for: Transcranial magnetic stimulation enhances the specificity of multiple sclerosis diagnostic criteria: a critical narrative review
Source: PeerJ. 2024 Mar 29;12:e17155. doi: 10.7717/peerj.17155 (PMC10984191; doi:10.7717/peerj.17155)
Supplement: Supplemental Information 3 [file peerj-12-17155-s003.xlsx]

## Sheet: DataExtraction
Citation	Inclusion criteria	Exclusion criteria	Funding source	Prospective study	Consecutive patients	Patients followed longitudinally	Number of MS participants	Diagnostic criteria	MS type	Number of female MS participants	Age of MS participants (years)	Handedness of MS participants	EDSS	Disease duration (years)	MRI lesion location	Other neurologic disorders studied	Control group	Number of controls	Number of female controls	Age of controls (years)	Controls age-matched	Controls sex-matched	Handedness of controls	CNS active drugs	Corticosteroids	Disease-modifying therapy	Other medications	Other drugs (e.g., caffeine, alcohol, tobacco, recreational drugs)	Neurologic / psychiatric comorbidities	Other medical comorbidities	TMS measures	Method for TMS measures	Method for determining motor threshold	History of specific repetitive motor activity	Target muscle	Target hemisphere	Position/ contact of EMG electrodes	Amount of relaxation / contraction of target muscles	Prior motor activity of the muscle to be tested	Level of relaxation of muscles other than those being tested	Type of stimulator (e.g., brand)	Pulse shape (e.g., monophasic/ biphasic)	Coil type	Coil orientation	Direction of induced current in the brain	Coil location and stability (with/without neuronavigation)	Determination of hotspot	Stimulation intensity	Attention during testing
Beer et al. 1995	Suspected MS, Admitted to inpatient neurology department	History of cardiac pacemaker, epilepsy, intracranial neurosurgery, increased intracranial pressure, or established diagnosis of MS or other neurologic disorder, Age < 16 years	Swiss National Science Foundation [Grant No 3.852-1.86]	Y	Y	N	142	Poser 1983	NR	80	37 (16-66)	NR	NR	2.9 (0-25)	Periventricular, Infratentorial (frequencies not specified)	Functional neurologic symptoms, Cerebraovascular disease, Non-inflammatory myelopathy, Other CNS inflammatory diseases, Other neurologic disorders	Other neurological diagnoses	47	27	41 (19-67)	NR	NR	NR	NR	NR	NR	NR	NR	Participants with history of established neurologic diagnosis, seizures, intracranial neurosurgery, or increased intracranial pressure excluded	Participants with history of cardiac pacemaker excluded	CMCT	NR	Resting	NR	Abductor digiti minimi Biceps brachii, Tiabilis anterior	Bilateral	Bipolar surface EMG	Relaxed	Background EMG recorded	NR	Custom	Monophasic	9 cm circular	Tagential to scalp	Clockwise, Anticlockwise	Centred over hotspot and marked using pen	Minimal stimulation intensity during scalp mapping with 2 cm steps in sagittal and coronal planes	Stimulator intensity above RMT to elicit reproducible EMG responses	NR
Caramia et al. 2004	Established diagnosis of definite MS, Active or inactive RMS, EDSS 0-3, History of ≥ 2 documented relapses	NR	NR	Y	N	Y	79	McDonald 2001	47 inactive RMS, 32 active RMS	39 inactive RMS, 27 active RMS	Inactive RMS 37.8 (20-55), Active RMS 35.1 (18-52)	7 L sided weakness, 16 R sided weakness, 2 bilateral weakness, 54 normal bilateral strength	Inactive RMS 1 (0-2), Active RMS 2 (1-3)	Inactive RMS 4.5 (1-15), Active RMS 4.1 (1-11)	Centrum semoivale, subcortical white matter (frequencies not specified)	NA	Healthy controls	20	12	36.2 (18-52)	Y	NR	NR	N	N	N	N	N	NR	NR	CMCT	F-wave latency	Resting	NR	Opponens pollicis brevis	More clinically affected side	Bipolar surface EMG (belly-tendon montage)	40% maximal contraction	Background EMG recorded, Auditory feedback provided	NR	Magstim 200	Monophasic	9.5 cm figure-of-eight	Tangential to scalp with handle posterolateral 45o to midsagittal line	NR	Centred over hotspot	NR	105% RMT	Focused on auditory EMG feedback
Cruz-Martínez et al. 2000	Established diagnosis of definite MS	History of cardiac pacemaker, epilepsy, or intracranial neurosurgery	NR	Y	Y	Y	50	Poser 1983	NR	31	31.9 (15-58)	NR	NR	4.2 (0-15)	98% motor pathways: subcortical white matter, internal capsule, mesencephalon, pons, 88% internal capsule, 86% sensory pathways (regions/tracts not specified), 67% cervical spinal cord, 62% cerebellum, 44% brainstem, 40% optic radiations	NA	Healthy controls	38	23	32.7 (14-56)	Y	NR	NR	NR	NR	NR	NR	NR	Participants with hisroty of epilepsy or intracranial neurosurgery excluded	Participants with history of cardiac pacemaker excluded	RMT, MEP. CMCT	RMT (NA), MEP (amplitude), CMCT (F-wave latency)	Resting	NR	Opponens pollicis brevis, Tibialis anterior	Bilateral	Bipolar surface EMG	Slight contraction	NR	NR	Magstim 200	Monophasic	Circular	Tangential to scalp	Clockwise, Anticlockwise	Centred over vertex or just anterior to vertex	NR	130% RMT	NR
Facchetti et al. 1997	Established diagnosis of definite MS, Outpatients at neurology clinic	History of PPMS, probable MS, or possible MS	NR	N	Y	N	53	Poser 1983	40 RMS, 13 SPMS	30 RMS, 10 SPMS	RMS 36 ± 10, SPMS 40 ± 7.4	NR	RMS 2 ± 1, SPMS 5 ± 1	RMS 8.1 ± 7.5, SPMS 11.8 ± 5.8	Subcortical white matter (frequencies not specified)	NA	Healthy controls	20	10	30.1 ± 5.5	NR	NR	NR	NR	NR	NR	NR	NR	NR	NR	CMCT	Nerve root latency	Resting	NR	Abductor digiti minimi, Tibialis anterior	Bilateral	Bipolar surface EMG	Slight contraction	NR	NR	Cadwell MS10	Monophasic	NR	NR	NR	NR	NR	130% RMT	NR
Hess et al. 1987	Patients with diagnosis of definite, probable, or possible MS, Referred to laboratory for neurophysiological investigation or admitted to inpatient neurology department	History of epilepsy, intracranial neurosurgery, or cardiac pacemaker	UK Multiple Sclerosis Society, Roche Research Foundation, Rotary Foundation	N	Y	N	83	Poser 1983	NR	NR	41.4 (18-68)	NR	NR	8.3 (0-33)	NR	NA	Healthy controls	32	5	36.8 (21-78)	NR	NR	NR	NR	NR	NR	NR	NR	Participants with history of epilepsy or intracranial neurosurgery excluded	Participants with history of cardiac pacemaker excluded	MEP, CMCT	MEP (amplitude), CMCT (nerve root latency)	Active	NR	Abductor digiti minimi	Bilateral	Bipolar surface EMG (belly-tendon montage)	5-10% maximal contraction	Background EMG recorded	NR	Custom	Monophasic	9 cm circular	Tangential to scalp	Clockwise, Anticlockwise	Centred over vertex	NR	Stimulator intensity above AMT to elicit reproducible EMG responses	NR
Jung et al. 2006	Established diagnosis of definite or possible MS, Inactive disease for ≥ 6 weeks, EDSS ≤ 4	NR	Biogen Idec.	N	N	N	49	McDonald 2001	49 inactive RMS	27	35.2 (23-54)	NR	1.5 (0-4)	1 ± 1.5	79% corpus callosum, 0 pontine lesions, Supratentorial, brainstem (midbrain/medulla), cerebellum (frequencies not specified)	NA	Healthy controls	20	7	29 (18-44)	NR	NR	NR	NR	N	Interferon Beta, Glatieramer Acetate	NR	NR	NR	NR	CMCT, iSP, TCT	CMCT (nerve root latency), iSP (latency, duration, depth), TCT (iSP latency minus MEP latency)	Resting	NR	Abductor pollicis brevis, Tibialis anterior	Bilateral	Bipolar surface EMG (belly-tendon montage)	Maximal contraction	Background EMG recorded, Auditory feedback provided	NR	Magstim 200	Monophasic	9 cm figure-of-eight	Tangential to scalp with handle backwards and 0°, 22.5°, or 45° to midsagittal line to produce longest iSP	NR	Centred over hotspot	Coil location that produced consistently largest MEP	80% MSO	Focused on auditory EMG feedback
Kale et al. 2009	Established diagnosis of definite MS, Inactive disease, Outpatients at neurology clinic	History of epilepsy, head trauma, intracranial neurosurgery, or cardiac pacemaker or other metallic implant, Active disease in last ≤ 8 weeks	NR	N	Y	N	131	Poser 1983	73 inactive RMS, 43 inactive SPMS, 15 inactive PPMS	111	36 ± 8	NR	66 participants 0-2, 33 participants 2-4, 32 participants > 4	NR	NA	NA	Healthy controls	53	35	39 ± 9.5	NR	NR	NR	NR	N	NR	NR	NR	Participants with history of epilepsy, head trauma, intracranial neurosurgery excluded	Participants with history of cardiac pacemaker or other metallic implant excluded	MEP, CMCT	MEP (amplitude, latency), CMCT (nerve root latency)	Resting	NR	Abductor pollicis brevis	Bilateral	Bipolar surface EMG	Relaxed	Background EMG recorded	NR	Magstim 200	Monophasic	Circular	Tangential to scalp	Clockwise, Anticlockwise	Centred over hotspot	Optimal scalp position for eliciting MEPs was searched for	NR	NR
Kale et al. 2010	Established diagnosis of definite MS, Inactive RMS or SPMS Outpatients at neurology clinic	History of epilepsy, head trauma, intracranial neurosurgery, or cardiac pacemaker or other metallic implant, Active disease or steroid use in last ≤ 8 weeks	NR	N	N	N	79	McDonald 2001	60 inactive RMS, 19 inactive SPMS	51	35.3 ± 7.6	NR	41 participants 0-2, 19 participants 2-4, 19 participants > 4	32 participants < 5, 31 participants 5-10, 16 participants > 10	39% corpus callosum atrophy, Lesions not reported	NA	Healthy controls	50	31	35.4 ± 10.4	Y	Y	NR	NR	N	NR	NR	NR	Participants with history of epilepsy, head trauma, intracranial neurosurgery excluded	Participants with history of cardiac pacemaker or other metallic implant excluded	MEP, CMCT	MEP (area, latency), CMCT (nerve root latency)	Resting	NR	Abductor pollicis brevis	Bilateral	Bipolar surface EMG	Relaxed	Background EMG recorded	NR	Magstim 200	Monophasic	Circular	Tangential to scalp	Clockwise, Anticlockwise	Centred over hotspot	Optimal scalp position for eliciting MEPs was searched for	NR	NR
Kandler et al. 1991	Established diagnosis of definite, probable, possible, or suspected MS	History of epilepsy, intracranial neurosurgery, or cardiac pacemaker	NR	N	Y	N	162	McDonald & Halliday 1977	NR	112	38 (16-75)	NR	NR	NR	NA	NA	Healthy controls	30	12	38 (22-74)	NR	NR	NR	NR	NR	NR	NR	NR	Participants with history of epilepsy or intracranial neurosurgery excluded	Participants with history of cardiac pacemaker excluded	MEP, CMCT	MEP (amplitude), CMCT (nerve root latency)	NR	NR	Abductor digiti minimi, Abductor hallucis	Bilateral	Bipolar surface EMG	Relaxed	Background EMG recorded, Auditory feedback provided	NR	Magstim 200	Monophasic	Circular	Tangential to scalp	Clockwise, Anticlockwise	Centred over vertex or slightly anterior to vertex	NR	90-100% MSO	Focused on auditory EMG feedback
Leocani et al. 2006	Established diagnosis of clinically definite MS, Inactive disease, Outpatients at neurology clinic, Complete neurologic exam and evoked potentials < 3 weeks apart	Active disease in last 2 months	Italian National Ministry of Health [Grant No 96/J/T44]	Y	Y	Y	84	Poser 1983	43 inactive RMS, 28 inactive SPMS, 13 inactive PPMS	28 inactive RMS, 18 inactive SPMS, 5 inactive PPMS	Inactive RMS 33.7 ± 9.4, Inactive SPMS 41 ± 9.5, Inactive PPMS 43.8 ± 6.9	NR	Inactive RMS 3 (1-6), Inactive SPMS 5 (2.5-8), Inactive PPMS 5.5 (2-6.5)	Inactive RMS 7.1 ± 5.9, Inactive SPMS 9.4 ± 7.1, Inactive PPMS 4.5 ± 5.5	NA	NA	Healthy controls	NR	NR	NR	NR	NR	NR	NR	N	NR	NR	NR	NR	NR	CMCT	Nerve root latency	NR	NR	Abductor pollicis brevis, Abductor hallucis	Bilateral	NR	20% maximal contraction	NR	NR	Cadwell MS10	Monophasic	12 cm circular	Tangential to scalp	Clockwise, Anticlockwise	Centred over vertex	NR	NR	NR
Magistris et al. 1999	Established diagnosis of definite, probable, or suspected MS, Referred to laboratory for neurophysiological investigation	NR	Swiss National Science Foundation [Grant No 31–43454.95]	Y	Y	N	116	Poser 1983	NR	NR	39 (17-76)	NR	NR	NR	NA	Cerebrovascular disorders, Neurodegenerative disorders, Amyotropic lateral sclerosis, Myelopathy, Peripheral nerve disorders, Functional neurologic symptoms, Other neurologic disorders, Non-neurologic disorders	Other neurological diagnoses	155	NR	51 (17-90)	NR	NR	NR	NR	NR	NR	NR	NR	NR	NR	CMCT, TST	CMCT (F-wave latency), TST (amplitude or area ratio)	Active	NR	Abductor digiti minimi	Bilateral	Bipolar surface EMG (belly-tendon montage)	Slight contraction	Background EMG recorded, Auditory feedback provided	NR	Magstim 200	Monophasic	9 cm circular	Tangential to scalp	Clockwise, Anticlockwise	Centred over vertex or slightly lateral	Coil location that produced lowest motor threshold was searched for	NR	Focused on auditory EMG feedback
Mayr et al. 1991	Established diagnosis of definite MS	NR	NR	N	N	N	44	Poser 1983	NR	31	37.8	NR	NR	7.9	NR	NA	Healthy controls	86	49	38.2 (17-72)	NR	NR	NR	NR	NR	NR	NR	NR	NR	NR	MEP, CMCT	MEP (amplitude), CMCT (F-wave latency)	Resting	NR	Opponens pollicis brevis, Abductor hallucis	Bilateral	Bipolar surface EMG	Slight contraction	Background EMG recorded, Auditory feedback provided	NR	Magstim 200	Monophasic	8.5 cm circular	Tangential to scalp	Clockwise, Anticlockwise	Centred over vertex or 1-2 cm anterior to vertex	NR	120% RMT	Focused on auditory EMG feedback
Pisa et al. 2020	Established diagnosis of definite MS, PrMS diagnosed ≥ 12 months before study, Admitted to inpatient neurorehabilitation department, Referred for neuromodulation and neurorehabilitation, Inactive disease for ≥ 6 months, EDSS 4-6.5, Pyramidal functional systems score ≥ 3, cerebellar score ≤ 2, and cerebral score < 2	History of comorbidity affecting ambulation, recent botulinum toxin treatment, epilepsy, intracranial neurosurgery, head trauma, stroke, pregnancy, metallic implant, or cardiac pacemaker	Fondazione Italiana Sclerosi Multipla [Grant No FISM2012/R/9]	N	Y	N	50	Revised McDonald 2010	32 inactive SPMS, 18 inactive PPMS	27	49.4 ± 7.5	9 unilateral weakness, 11 bilateral weakness, 17 normal strength bilaterally, 13 not tested	5.8 ± 0.7	≥ 1	NR	NA	Healthy controls	10	NR	NR	Y	Y	NR	NR	N	NR	Participants with recent botulinum toxin treatment excluded	NR	Participants with history of epilepsy, head trauma or intracranial neurosurgery, stroke, upper limb sensory dysfunction, or cerebellar dysfunction excluded	Participants with history of comorbidity affecting ambulation, pregnancy, metallic implant, or cardiac pacemaker excluded	MEP	Latency	Resting	NR	First dorsal interosseus, Tibialis anterior	Dominant side	Bipolar surface EMG (belly-tendon montage)	Relaxed	NR	NR	Magstim 200	Monophasic	7 cm figure-of-eight	Tangential to scalp	NR	Centred over hotspot, Marked on swimcap with pen	NR	120% RMT, 100% MSO	NR
Ravnborg et al. 1992	CIS, Admitted to inpatient neurology department	History of established neurologic diagnosis	Danish Multiple Sclerosis Society, Fondsborsvekselerer Henry Hansen Og Hustru, Carla Hansen, Fodt Westergaards Legat, Lykfeldts Legat, Foundation for Experimental Research in Neurology	Y	Y	N	68	Poser 1983	40 diagnosed as MS, 28 diagnosed as no MS	38	40 (18-63)	NR	NR	1 (0-20)	Corticospinal tract, periventricular, subcortical white matter, cerebellum (frequencies not reported)	NA	Healthy controls	50	25	18-60	NR	NR	NR	NR	NR	NR	NR	NR	Participants with history of established neurologic diagnosis excluded	NR	MEP, CMCT	MEP (amplitude), CMCT (nerve root latency)	Active	NR	Biceps brachii, Flexor carpi radialis, First dorsal interosseus, Tibialis anterior, Abductor hallucis	Bilateral	Bipolar surface EMG (belly-tendon montage)	10 and 15% maximal root-mean-square EMG	Background EMG recorded, Visual feedback provided	NR	Dantec	Monophasic	14 cm circular	Tangential to scalp with handle oriented in sagittal plane	Clockwise, Anticlockwise	Centred 1 cm anterior to vertex	NR	120% AMT	Focused on visual EMG feedback
Schmierer et al. 2000	Established diagnosis of definite MS	NR	Charité Forschungsförderung [Grant No 97–209]	N	N	N	50	Poser 1983	50 RMS	32	33 (16-52)	NR	2 (0-4.5)	2.4 (1-6)	Middle corpus callosum (88%), Posterior corpus callosum and/or pericallosal white matter (69%), Anterior corpus callosum (56%)	NA	Healthy controls	25	14	31.8 (23-46)	NR	NR	NR	NR	NR	NR	NR	NR	NR	NR	MEP, CMCT, iSP, TCT	MEP (amplitude), CMCT (nerve root latency), iSP (latency, duration), TCT (iSP minus MEP latency)	Active	NR	First dorsal interosseus, Tibialis anterior	Bilateral	Biopolar surface EMG	Maximal contraction	Background EMG recorded	NR	Magstim 200	Monophasic	8.5 cm figure-of-eight	Tangential to scalp, with handle anterior-posterior	Posterior-anterior	Centred over hotspot	Individually determined point from which maximal EMG responses could be obtained; on average, 6 cm lateral and 1 cm anterior to vertex	80% MSO	NR
Schmierer et al. 2002	Established diagnosis of definite MS, No active disease for ≥ 3 months	NR	NR	Y	N	Y	118	Poser 1983	96 inactive RMS, 19 inactive PPMS, 3 inactive SPMS	76	37 (16-65)	NR	2.9 (0-6.5)	4.9 (1-21)	NA	NA	Healthy controls	35	18	36 (20-62)	Y	Y	NR	NR	N	NR	NR	NR	NR	NR	RMT, CMCT, iSP, TCT	RMT (relative frequency), CMCT (nerve root latency), iSP (latency, duration), TCT (iSP minus MEP latency)	Resting	NR	First dorsal interosseus, Tibialis anterior	Bilateral	Biopolar surface EMG	Maximal contraction	Background EMG recorded	NR	Magstim 200	Monophasic	8.5 cm figure-of-eight	Tangential to scalp, with handle anterior-posterior	Posterior-anterior	Centred over hotspot	Individually determined point from which maximal EMG responses could be obtained	80% MSO	NR
Tataroglu et al. 2003	Established diagnosis of definite MS, Inactive disease, Outpatients at neurology clinic	History of other neurologic or systemic disease	NR	N	Y	N	50	McDonald 2001	37 RMS, 21 PrMS,	38	RMS 28.6 (17-49), PrMS 42.2 (26-56)	NR	RMS 1.7 ± 1.2, PrMS 4.5 ± 1.9	6.7 (1-22)	Periventricular white matter and/or corpus callosum (82%), Brainstem and periventricular white matter (12%), Brainstem and cervical spinal cord (7%)	NA	Healthy controls	31	18	33.4 (22-49)	NR	NR	NR	NR	N	NR	NR	NR	Participants with history of other neurologic disease excluded	Participants with history of other systemic disease excluded	MEP, CMCT, CSP	MEP (amplitude, latency) CMCT (nerve root latency), CSP (duration or latency)	Resting	NR	First dorsal interosseus, Tibialis anterior	Bilateral	NR	50% maximal contraction	Background EMG recorded, Visual feedback provided	NR	Magstim 200	Monophasic	9 cm circular	Tangential to scalp	Clockwise, Anticlockwise	Centred over vertex or 2-3 cm anterior to vertex	NR	150% RMT	Focused on visual EMG feedback
[truncated: 22 more columns]
